# Supplementary material for: Direct Catalytic Enantio- and Diastereoselective Ketone Aldol Reactions of Isocyanoacetates
Source: PubMed Central journal article supplement (PMC4678506; doi:10.1002/anie.201411852), 2015-03-03
Supplement: anie0054-4895-sd1.pdf [file anie0054-4895-sd1.pdf]

Supporting Information

**Direct Catalytic Enantio- and Diastereoselective Ketone Aldol Reactions of Isocyanoacetates\*\***

*Raquel de la Campa, Irene Ortín, and Darren J. Dixon\**

anie\_201411852\_sm\_miscellaneous\_information.pdf

# Table of Contents

|          |                                                            |          |
|----------|------------------------------------------------------------|----------|
| <b>1</b> | <b>General Experimental</b>                                |          |
| 1.1      | Solvents and Reagents                                      | 4        |
| 1.2      | Chromatography                                             | 4        |
| 1.3      | Melting points                                             | 4        |
| 1.4      | Mass spectra                                               | 4        |
| 1.5      | Infrared spectra                                           | 4        |
| 1.6      | NMR spectra                                                | 4        |
| 1.7      | Determination of enantiomeric excess                       | 4        |
| 1.8      | Optical rotations                                          | 5        |
| <b>2</b> | <b>Synthesis and Characterization details</b>              | <b>5</b> |
| 2.1      | Synthesis of starting materials                            | 5        |
| 2.1.1    | Synthesis and characterization of ligand <b>1a</b>         | 5        |
| 2.1.2    | Synthesis and characterization of ligand <b>1b</b>         | 6        |
| 2.2      | General procedure for the synthesis of oxazolines <b>4</b> | 7        |
| 2.2.1    | Compound <b>4a</b>                                         | 7        |
| 2.2.2    | Compound <b>4b</b>                                         | 8        |
| 2.2.3    | Compound <b>4c</b>                                         | 8        |
| 2.2.4    | Compound <b>4d</b>                                         | 8        |
| 2.2.5    | Compound <b>4e</b>                                         | 9        |
| 2.2.6    | Compound <b>4f</b>                                         | 9        |
| 2.2.7    | Compound <b>4g</b>                                         | 9        |
| 2.2.8    | Compound <b>4h</b>                                         | 10       |
| 2.2.9    | Compound <b>4i</b>                                         | 10       |
| 2.2.10   | Compound <b>4j</b>                                         | 10       |
| 2.2.11   | Compound <b>4k</b>                                         | 11       |
| 2.2.12   | Compound <b>4l</b>                                         | 11       |
| 2.2.13   | Compound <b>4m</b>                                         | 11       |
| 2.2.14   | Compound <b>4n</b>                                         | 12       |
| 2.2.15   | Compound <b>4o</b>                                         | 12       |
| 2.2.16   | Compound <b>4p</b>                                         | 12       |
| 2.2.17   | Compound <b>4q</b>                                         | 13       |
| 2.2.18   | Compound <b>4r</b>                                         | 13       |
| 2.2.19   | Compound <b>4s</b>                                         | 13       |
| 2.2.20   | Compound <b>4t</b>                                         | 13       |
| 2.2.21   | Compound <b>4u</b>                                         | 14       |
| 2.2.22   | Compound <b>4v</b>                                         | 14       |
| 2.3      | General procedure for the synthesis of racemic oxazolines  | 15       |

|      |                                                                                                           |    |
|------|-----------------------------------------------------------------------------------------------------------|----|
| 2.4  | Synthesis and characterization of compounds <b>5</b>                                                      | 15 |
| 2.5  | Synthesis and characterization of compound <b>6</b>                                                       | 16 |
| 2.6  | Synthesis and characterization of compound <b>7</b>                                                       | 16 |
| 2.7  | Synthesis and characterization of compound <b>8</b>                                                       | 17 |
| 3.   | <sup>1</sup> H-NMR and <sup>13</sup> C-NMR spectra of pre-catalysts                                       | 18 |
| 3.1  | <sup>1</sup> H-NMR and <sup>13</sup> C-NMR spectra of compound <b>1a</b>                                  | 18 |
| 3.2  | <sup>1</sup> H-NMR and <sup>13</sup> C-NMR spectra of compound <b>1b</b>                                  | 20 |
| 4.   | <sup>1</sup> H-NMR and <sup>13</sup> C-NMR and HPLC traces of oxazolines and derivatives                  | 21 |
| 4.1  | <sup>1</sup> H-NMR and <sup>13</sup> C-NMR spectra and HPLC traces of compound <b>4a</b>                  | 21 |
| 4.2  | <sup>1</sup> H-NMR and <sup>13</sup> C-NMR spectra and HPLC traces of compound <b>4b</b>                  | 23 |
| 4.3  | <sup>1</sup> H-NMR and <sup>13</sup> C-NMR spectra and HPLC traces of compound <b>4c</b>                  | 25 |
| 4.4  | <sup>1</sup> H-NMR and <sup>13</sup> C-NMR spectra and HPLC traces of compound <b>4d</b>                  | 27 |
| 4.5  | <sup>1</sup> H-NMR and <sup>13</sup> C-NMR spectra and HPLC traces of compound <b>4e</b>                  | 29 |
| 4.6  | <sup>1</sup> H-NMR and <sup>13</sup> C-NMR spectra and HPLC traces of compound <b>4f</b>                  | 31 |
| 4.7  | <sup>1</sup> H-NMR and <sup>13</sup> C-NMR spectra and HPLC traces of compound <b>4g</b>                  | 33 |
| 4.8  | <sup>1</sup> H-NMR and <sup>13</sup> C-NMR spectra and HPLC traces of compound <b>4h</b>                  | 35 |
| 4.9  | <sup>1</sup> H-NMR and <sup>13</sup> C-NMR spectra and HPLC traces of compound <b>4i</b>                  | 37 |
| 4.10 | <sup>1</sup> H-NMR and <sup>13</sup> C-NMR spectra and HPLC traces of compound <b>4j</b>                  | 39 |
| 4.11 | <sup>1</sup> H-NMR and <sup>13</sup> C-NMR spectra and HPLC traces of compound <b>4k</b>                  | 41 |
| 4.12 | <sup>1</sup> H-NMR and <sup>13</sup> C-NMR spectra and HPLC traces of compound <b>4l</b>                  | 43 |
| 4.13 | <sup>1</sup> H-NMR and <sup>13</sup> C-NMR spectra and HPLC traces of compound <b>4m</b>                  | 45 |
| 4.14 | <sup>1</sup> H-NMR and <sup>13</sup> C-NMR spectra and HPLC traces of compound <b>4n</b>                  | 47 |
| 4.15 | <sup>1</sup> H-NMR and <sup>13</sup> C-NMR spectra and HPLC traces of compound <b>4o</b>                  | 49 |
| 4.16 | <sup>1</sup> H-NMR and <sup>13</sup> C-NMR spectra and HPLC traces of compound <b>4p</b>                  | 52 |
| 4.17 | <sup>1</sup> H-NMR and <sup>13</sup> C-NMR spectra and HPLC traces of compound <b>4q</b>                  | 54 |
| 4.18 | <sup>1</sup> H-NMR and <sup>13</sup> C-NMR spectra and HPLC traces of compound <b>4r</b>                  | 56 |
| 4.19 | <sup>1</sup> H-NMR and <sup>13</sup> C-NMR spectra and HPLC traces of compound <b>4s</b>                  | 58 |
| 4.20 | <sup>1</sup> H-NMR and <sup>13</sup> C-NMR spectra and HPLC traces of compound <b>4t</b>                  | 60 |
| 4.21 | <sup>1</sup> H-NMR and <sup>13</sup> C-NMR spectra and HPLC traces of compound <b>4u</b>                  | 62 |
| 4.22 | <sup>1</sup> H-NMR and <sup>13</sup> C-NMR spectra and HPLC traces of compound <b>4v</b>                  | 64 |
| 4.23 | <sup>1</sup> H-NMR and <sup>13</sup> C-NMR spectra and HPLC traces of compound <b>5a</b>                  | 66 |
| 4.24 | <sup>1</sup> H-NMR and <sup>13</sup> C-NMR spectra and HPLC traces of compound <b>5b</b>                  | 68 |
| 4.25 | <sup>1</sup> H-NMR and <sup>13</sup> C-NMR spectra and HPLC traces of compound <b>6</b>                   | 70 |
| 4.26 | <sup>1</sup> H-NMR and <sup>13</sup> C-NMR spectra of compound <b>7</b>                                   | 72 |
| 4.27 | <sup>1</sup> H-NMR and <sup>13</sup> C-NMR spectra and HPLC traces of compound <b>8</b>                   | 73 |
| 5.   | X-Ray data of compound <b>8</b>                                                                           | 75 |
| 6.   | <sup>1</sup> H-NMR and <sup>13</sup> C-NMR spectra and HPLC traces of <b>4x</b> , <b>4y</b> and <b>4z</b> | 75 |

# 1 General Experimental

## 1.1 Solvents and Reagents

All reagents bought from commercial suppliers were used as sold. Organic solvents were evaporated under reduced pressure using a Büchi rotary evaporator. Syringes and needles were oven dried at 90 °C. Anhydrous dichloromethane and tetrahydrofuran were dried by filtration through activated alumina (powder  $\approx$  159 mesh, pore size 58 Å, basic, Sigma aldrich) columns.

## 1.2 Chromatography

Reactions were monitored by thin layer chromatography (TLC) using Merck silica gel 60 F254 plates and visualized by fluorescence quenching under UV light. In addition, TLC plates were stained with a dipping solution of vanillin (15 g vanillin + 250 mL ethanol + 2.5 mL conc. H<sub>2</sub>SO<sub>4</sub>). Chromatographic purification was performed on VWR 60 silica gel 40-60  $\mu$ m using HPLC grade solvents that were used as supplied.

## 1.3 Melting points

Melting points were obtained on a Leica Galen III Hot-stage melting points apparatus and microscope and are uncorrected.

## 1.4 Mass spectra

High-resolution mass spectra (HRMS) were recorded on Bruker Daltonics MicroTOF mass spectrometer. High-resolution mass spectra (EI) were recorded on a Bruker FT-ICR Apex III mass spectrometer.

## 1.5 Infrared spectra

Infrared spectra were recorded on a Bruker Tensor 27 FT-IR spectrometer as a thin film. Only selected maximum absorbances are reported.

## 1.6 NMR spectra

NMR spectra were recorded using a Bruker Avance 200 MHz or 400 MHz spectrometer, chemical shifts ( $\delta$ ) are quoted per million referenced to the residual solvent peak. The multiplicity of each signal is designated using the following abbreviation: s, singlet; d, doublet; t, triplet; q, quartet; m, multiplet. Coupling constants ( $J$ ) are reported in Hertz (HZ).

## 1.7 Determination of enantiomeric excess

Enantiomeric excess were determined using analytical high performance liquid chromatography (HPLC) performed on an Agilent Technologies 1200 Series or 1260 Infinity Series systems (column and solvent conditions are given with the compound).

## 1.8 Optical rotations

Optical rotations were recorded using Perkin-Elmer 241 polarimeter; specific rotation (SR) ( $[\alpha]_D$ ) are reported in  $10^{-1} \text{ deg.cm}^2.\text{g}^{-1}$ ; concentrations ( $c$ ), are quoted in  $\text{g}/100\text{mL}$ ;  $D$  refers to the D-line of sodium (589 nm); temperatures ( $T$ ) are given in degree Celsius ( $^{\circ}\text{C}$ ).

## 2 Synthesis and Characterization details

### 2.1 Starting Materials

Compounds **2a**<sup>1</sup>, **3r**<sup>2</sup>, **3s**<sup>3</sup> and pre-catalyst **1c**<sup>4</sup> were prepared according to literature procedures. Compounds **2b**, **2c** were acquired commercially.

#### 2.1.1 Synthesis and characterization of 2-(diphenylphosphino)-*N*-((*S*)-((1*S*,2*S*,4*S*,5*R*)-5-ethylquinuclidin-2-yl)(6-methoxyquinolin-4-yl)methyl)benzamide **1a**

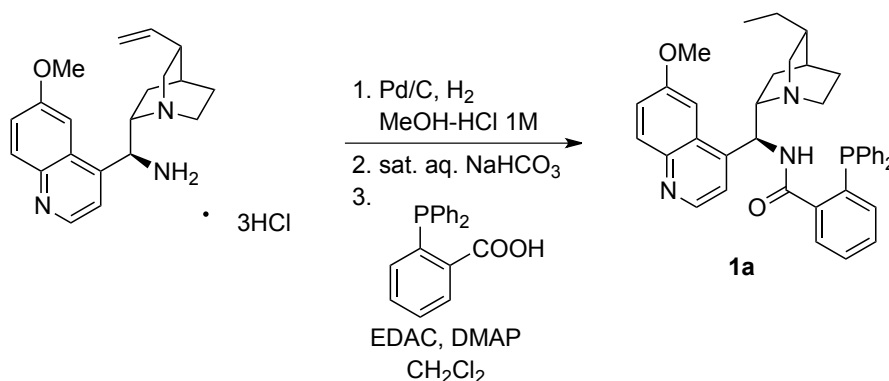

9-amino-9-deoxyepiquinine triple hydrochloride salt (6.2 g, 14.5 mmol, 1.0 equiv) was dissolved in 75 mL of a mixture of 2:1 MeOH/HCl<sub>aq</sub> 1M and 10% Pd/C (939 mg) was added. The reaction mixture was stirred under hydrogen atmosphere for 12 h at room temperature and then filtered through Celite washing with water and MeOH. The filtrate was concentrated under reduced pressure and neutralized with sat. NaHCO<sub>3</sub>. The resultant solution was extracted several times with CH<sub>2</sub>Cl<sub>2</sub>. The combined CH<sub>2</sub>Cl<sub>2</sub> extracts were dried over Na<sub>2</sub>SO<sub>4</sub> and concentrated under reduced pressure to yield a colourless oil (3.5 g of the reduced free amine, 10.5 mmol) which was dissolved in 300 mL of dry CH<sub>2</sub>Cl<sub>2</sub>. 2-(diphenylphosphino)benzoic acid (3.88g, 12.7 mmol, 1.2 equiv), 4-dimethylaminopyridine (155 mg, 1.2 mmol, 0.12 equiv) were added. The mixture was cooled to 0  $^{\circ}\text{C}$ , *N*-(3-Dimethylaminopropyl)-*N*-ethylcarbodiimide hydrochloride (2.2 g, 11.6 mmol, 1.1 equiv) was added and the ice bath was removed and the resultant solution was stirred at room temperature for 12 h. CH<sub>2</sub>Cl<sub>2</sub> was then removed under reduced pressure and the residue was dissolved in EtOAc

<sup>1</sup> N. Elders, Rob F. Schmitz, Frans J. J. de Kanter, Eelco Ruijter, Marinus B. Groen, and Romano V. A. Orru, *J. Org. Chem.* **2007**, *72*, 6135-6142.

<sup>2</sup> A. Cuetos, F. R. Bisogno, I. Lavandera, V. Gotor, *Chem. Commun* **2013**, *49*, 2625-2627.

<sup>3</sup> P. N. D. Singh, S. Muthukrishnan, R. S. Murthy, R. F. Klima, S. M. Mendel, M. Hawk, N. Yarbrough, A. D. Gudmundsdottir *Tetrahedron Lett.* **2003**, *44*, 9169-9171.

<sup>4</sup> F. Sladojevich, A. Trabocchi, A. Guarna, D. J. Dixon, *J. Am. Chem. Soc.* **2011**, *133*, 1710-1713.

and washed with water, 10% NaHCO<sub>3</sub>, brine and dried over Na<sub>2</sub>SO<sub>4</sub>. The organic phase was concentrated under reduced pressure and purified by flash column chromatography (EtOAc/MeOH 9:1). Impure fractions were purified by flash column chromatography (EtOAc/Et<sub>3</sub>N 99:1 to 95:5) to yield 3.24 g (50%) of **1a**. [ $\alpha$ ]<sub>D</sub><sup>20</sup>: -15.5 (c 0.4, CHCl<sub>3</sub>); M.p.: 104-105 °C; <sup>1</sup>H-NMR (CDCl<sub>3</sub>, 500 MHz):  $\delta$  8.70 (1H, d, *J* = 5.0 Hz), 8.05 (1H, d, *J* = 10.0 Hz), 7.69-7.73 (m, 2H), 7.40-7.43 (m, 2H), 7.28-7.35 (m, 8H), 7.17-7.24 (m, 4H), 6.94-6.97 (m, 1H), 5.46 (br s, 1H), 4.02 (s, 3H), 3.12-3.174 (m, 2H), 3.01 (br s, 1H), 2.61-2.67 (m, 1H), 2.29-2.31 (m, 1H), 1.60-1.65 (m, 1H), 1.34-1.55 (m, 4H), 1.20-1.33 (m, 3H), 0.92-0.94 (m, 1H), 0.85 (t, *J* = 5.0 Hz, 3H); <sup>13</sup>C-NMR (CDCl<sub>3</sub>, 125 MHz, P-C coupling not removed):  $\delta$  12.0, 14.2, 15.3, 21.1, 25.2, 25.9, 27.4, 28.5, 37.2, 41.1, 55.7, 57.6, 60.4, 65.9, 102.3, 121.6, 128.4, 128.5, 128.6, 128.7, 128.8, 130.2, 131.6, 133.5, 133.6, 133.7, 133.8, 134.3, 135.5, 136.9, 137.0, 137.3, 137.4, 141.4, 141.6, 144.7, 157.7, 168.9; <sup>31</sup>P-NMR (CDCl<sub>3</sub>, 162 MHz):  $\delta$  -10.4; IR:  $\nu_{\text{max}}$ /cm<sup>-1</sup> 2930, 1646, 1509, 1240, 746; HRMS (ESI, MeOH) calcd C<sub>39</sub>H<sub>41</sub>N<sub>3</sub>O<sub>2</sub>P (M+H<sup>+</sup>) 614.2931, found 614.2925

### 2.1.2 Synthesis and characterization of 2-(diphenylphosphino)-*N*-((1*R*)-((2*S*,5*R*)-5-ethylquinuclidin-2-yl)(6-methoxyquinolin-4-yl)methyl)benzamide **1b**

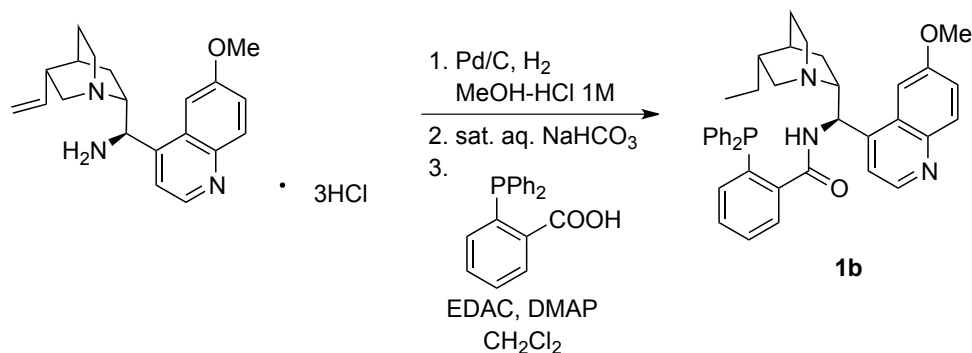

9-amino-9-deoxyepiquinidine triple hydrochloride salt (3.00 g, 6.93 mmol, 1 equiv) was dissolved in a 2:1 mixture MeOH/ 1M HCl (45 mL) and 10% (w/w) Pd/C (369 mg, 0.346 mmol, 0.05 equiv) was added. The reaction mixture was stirred under hydrogen atmosphere (balloon) at room temperature for 7 h, then filtered through Celite washing with MeOH. Evaporation of the filtrate gave a yellow solid, which was taken up with 0.5 M KOH (80 mL) and extracted with a 3:1 mixture of CHCl<sub>3</sub>/*i*-PrOH (8 times). The combined organic layers were dried over Na<sub>2</sub>SO<sub>4</sub>, filtered and evaporated to afford a thick orange oil (2.17g of the reduced free amine, 6.65 mmol, 96%). The crude was dissolved in dry CH<sub>2</sub>Cl<sub>2</sub> (150 mL) and 2-(diphenylphosphino)benzoic acid (2.20 g, 6.98 mmol, 1.05 equiv) and 4-dimethylaminopyridine (81.0 mg, 0.665 mmol, 0.1 equiv) were added in sequence. After cooling the solution to 0 °C, *N*-(3-Dimethylaminopropyl)-*N*-ethylcarbodiimide hydrochloride (1.37 g, 6.98 mmol, 1.05 equiv) was added. The reaction mixture was stirred at room temperature for 13 h, then the solvent was evaporated. The residual orange foam was taken up in EtOAc and washed with water, 10% NaHCO<sub>3</sub>, brine. The organic phase was dried over Na<sub>2</sub>SO<sub>4</sub> and evaporated. The crude was purified by flash column chromatography (first column: EtOAc to EtOAc/MeOH 9:1; second column EtOAc/Et<sub>3</sub>N 99:1 to 95:5) to yield 2.04 g (50%) of **1b** as a fluffy white solid. [ $\alpha$ ]<sub>D</sub><sup>20</sup>: +89.8 (c 0.500, CHCl<sub>3</sub>); M.p.: 103-105 °C; <sup>1</sup>H-NMR (CDCl<sub>3</sub>, 500 MHz):  $\delta$  8.59 (1H, d, *J* = 5.0 Hz), 7.99 (1H, d, *J* = 9.0 Hz), 7.65 (1H, br s), 7.61 (1H, d, *J* = 2.5 Hz), 7.47-7.33

(3H, m), 7.30-7.26 (8 H, m), 7.21 (2H, dt,  $J = 7.5, 1.5$  Hz), 7.17 (2H, t,  $J = 7.5$  Hz), 6.91 (1H, m), 5.30 (1H, br s), 3.97 (3H, s), 2.90-2.65 (4H, m), 2.50 (1H, m), 1.76 (1H, br s), 1.51 (1H, br s), 1.45-1.35 (5H, m), 1.22 (1H, m), 0.92 (1H, m), 0.88 (3H, t,  $J = 7.0$  Hz);  $^{13}\text{C-NMR}$  ( $\text{CDCl}_3$ , 125 MHz, P-C coupling not removed):  $\delta$  169.1, 157.2, 147.3, 144.8, 141.6, 141.4, 137.6, 137.5, 137.2, 137.1, 135.8, 135.7, 134.4, 134.1, 133.9, 133.8, 133.7, 131.8, 130.3, 128.9, 128.9, 128.7, 128.7, 128.6, 128.6, 121.9, 101.8, 55.6, 49.3, 37.6, 27.6, 26.2, 25.8, 25.2, 12.2;  $^{31}\text{P-NMR}$  ( $\text{CDCl}_3$ , 162 MHz):  $\delta$  -10.4; IR:  $\nu_{\text{max}}/\text{cm}^{-1}$  2933, 1621, 1433, 1227, 1151, 744.; HRMS (ESI, MeOH) calcd  $\text{C}_{39}\text{H}_{41}\text{N}_3\text{O}_2\text{P}$  ( $\text{M}+\text{H}^+$ ) 614.2931, found 614.2940

## 2.2 General procedure for the preparation of oxazolines 4

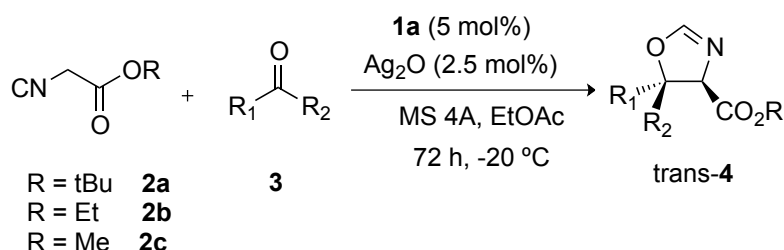

Pre-catalyst **1a** (11.8 mg, 0.017 mmol) and  $\text{Ag}_2\text{O}$  (2.1 mg, 0.008 mmol) were dissolved in 2.0 mL of EtOAc in presence of powdered 4A MS and the ketone **3** (0.386 mmol, 1.1 equiv) was added. The heterogeneous mixture was cooled at -20 °C in a fridge and stirred for 30 min. After that, the isocyanate **2** (0.351 mmol, 1.0 equiv) previously dissolved in 2.0 mL of EtOAc and cooled at -20 °C, was added. The reaction mixture was stirred at the same temperature for 72 h (time needed to the total consumption of the isocyanacetate, according with the TLC). The reaction mixture was then quickly filtered through a short pad of celite (in a glass pipette) and eluted with EtOAc. The filtrate was concentrated under reduced pressure and purified by flash column chromatography on silica gel using mixtures of petroleum ether/ethyl acetate (9/1→3/1→1/1) to yield oxazolines **4** as pure compounds.

### 2.2.1 Synthesis and characterization of (4*S*,5*S*)-*tert*-butyl 5-methyl-5-phenyl-4,5-dihydrooxazole-4-carboxylate **4a**.

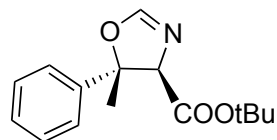

The general procedure was followed. The desired product was obtained as a colorless oil in 84% yield (77 mg, trans:cis=94:6; data for the trans diastereoisomer). The er was determined by HPLC using a Chiralpack AD-H [hexane/iso-propanol 90:10,  $\lambda$  220, 1 mL/min]  $t$  (minor) = 6.95 min.,  $t$  (major) = 7.58 min (94:6).  $[\alpha]_{\text{D}}^{20} = -72.6$  ( $c$  1.00,  $\text{CHCl}_3$ );  $^1\text{H NMR}$  (400 MHz,  $\text{C}_6\text{D}_6$ )  $\delta$  1.31 (s, 9H), 1.62 (s, 3H), 4.81 (d,  $J = 2.0$  Hz, 1H), 6.64 (d,  $J = 2.0$  Hz, 1H), 7.02-7.08 (m, 1H), 7.13-7.17 (m, 2H), 7.42-7.48 (m, 2H);  $^{13}\text{C NMR}$  (100 MHz,  $\text{C}_6\text{D}_6$ )  $\delta$  24.7 ( $\text{CH}_3$ ), 27.5 (3x $\text{CH}_3$ ), 78.5 (CH), 81.3 (C), 87.3 (C), 124.1 (2xCH), 127.5 (CH), 128.6 (2xCH), 146.1 (C), 154.8 (C), 168.3 (C); IR  $\nu_{\text{max}}/\text{cm}^{-1}$  1742, 1633, 1369, 1150, 700; HRMS (ES) calcd  $\text{C}_{15}\text{H}_{20}\text{NO}_3$  [ $\text{M}+\text{H}^+$ ] 262.1438, found 262.1444.

**2.2.2 Synthesis and characterization of (4*S*,5*S*)-*tert*-butyl 5-(4-methoxyphenyl)-5-methyl-4,5-dihydrooxazole-4-carboxylate 4b.** The general procedure was followed. The desired product was

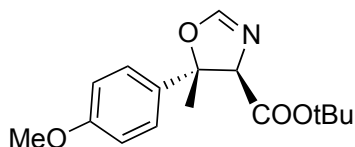

obtained as a colorless oil in 73% yield (75 mg, trans:cis=92:8; data for the trans diastereoisomer); The er was determined by HPLC using a Chiralpack AD-H [hexane/iso-propanol 90:10,  $\lambda$  220, 1 mL/min] t (major) = 8.59 min., t (minor) = 10.45 min. ( $[\alpha]_D^{20}$  = -61.87 ( $c$  0.8,  $\text{CHCl}_3$ );  $^1\text{H}$  NMR (400 MHz,  $\text{C}_6\text{D}_6$ )  $\delta$  1.32 (s, 9H), 1.65 (s, 3H), 3.30 (s, 3H), 4.85 (d,  $J$  = 2.0 Hz, 1H), 6.64 (d,  $J$  = 2.0 Hz, 1H), 6.76 (app d,  $J$  = 8.5 Hz, 2H), 7.37 (app d,  $J$  = 8.5 Hz, 2H);  $^{13}\text{C}$  NMR (100 MHz,  $\text{C}_6\text{D}_6$ )  $\delta$  24.6 ( $\text{CH}_3$ ), 27.5 (3x $\text{CH}_3$ ), 54.5 ( $\text{CH}_3$ ), 78.7 (CH), 81.2 (C), 87.2 (C), 113.9 (2xCH), 125.4 (2xCH), 137.9 (C), 154.7 (CH), 159.2 (C), 168.4 (C); IR  $\nu_{\text{max}}/\text{cm}^{-1}$  1744, 1633, 1149, 834. HRMS (ES) calcd  $\text{C}_{16}\text{H}_{21}\text{NNaO}_4$   $[\text{M}+\text{Na}]^+$  314.1363, found 314.1363.

**2.2.3 Synthesis and characterization of (4*S*,5*R*)-*tert*-butyl 5-(5-bromothiophen-2-yl)-5-methyl-4,5-dihydrooxazole-4-carboxylate 4c.** The general procedure was followed. The desired product was

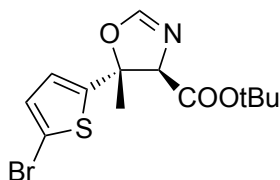

obtained as a colorless oil in 78% yield (94 mg, trans:cis=88:12; data for the trans diastereoisomer); The er was determined by HPLC using a Chiralpack AD-H [hexane/iso-propanol 90:10,  $\lambda$  220, 1 mL/min] t (minor) = 6.09 min., t (major) = 8.30 min. ( $[\alpha]_D^{20}$  = -71.7 ( $c$  1.00,  $\text{CHCl}_3$ );  $^1\text{H}$  NMR (400 MHz,  $\text{C}_6\text{D}_6$ )  $\delta$  1.27 (s, 9H), 1.54 (s, 3H), 4.73 (d,  $J$  = 2.0 Hz, 1H), 6.40-6.44 (m, 1H), 6.54 (d,  $J$  = 4.0 Hz, 1H), 7.16 (s, 1H);  $^{13}\text{C}$  NMR (100 MHz,  $\text{C}_6\text{D}_6$ )  $\delta$  23.7 ( $\text{CH}_3$ ), 27.5 (3x $\text{CH}_3$ ), 78.5 (CH), 81.5 (C), 85.1 (C), 111.7 (C), 123.5 (CH), 129.8 (CH), 150.3 (C), 154.2 (CH), 167.3 (C); IR  $\nu_{\text{max}}/\text{cm}^{-1}$  1745, 1632, 1149; HRMS (ES) calcd  $\text{C}_{13}\text{H}_{16}\text{BrNNsO}_3\text{S}$   $[\text{M}+\text{Na}]^+$  367.9926, found 367.9936.

**2.2.4 Synthesis and characterization of (4*S*,5*S*)-*tert*-butyl 5-methyl-5-(4-nitrophenyl)-4,5-dihydrooxazole-4-carboxylate 4d.** The general procedure was followed. The desired product was

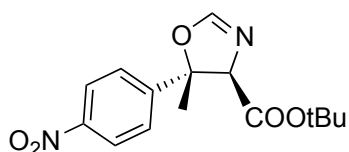

obtained as a colorless oil in 60% yield (64 mg, trans:cis=90:10; data for the trans diastereoisomer); The er was determined by HPLC using a Chiralpack OD-H [hexane/iso-propanol 90:10,  $\lambda$  220, 1 mL/min] t (minor) = 12.27 min., t (major) = 15.06 min (95:5);  $[\alpha]_D^{20}$  = -86.5 ( $c$  1.00,  $\text{CHCl}_3$ );  $^1\text{H}$  NMR (400 MHz,  $\text{C}_6\text{D}_6$ )  $\delta$  1.32 (s, 9H), 1.43 (s, 3H), 4.54 (d,  $J$  = 2.0 Hz, 1H), 6.46 (d,  $J$  = 2.0 Hz, 1H), 7.11 (d,  $J$  = 8.0 Hz, 2H), 7.76 (d,  $J$  = 8.0 Hz, 2H);  $^{13}\text{C}$  NMR (100 MHz,  $\text{C}_6\text{D}_6$ )  $\delta$  24.2 ( $\text{CH}_3$ ), 27.6 (3x $\text{CH}_3$ ), 78.1 (CH), 81.8 (C), 86.6 (C), 123.6 (2xCH), 124.7 (2xCH), 147.3 (C), 151.7 (C), 154.8 (CH), 168.3 (C); IR  $\nu_{\text{max}}/\text{cm}^{-1}$  1743, 1635, 1522, 1350, 1149, 846; HRMS (ES) calcd  $\text{C}_{15}\text{H}_{18}\text{N}_2\text{O}_2\text{Na}$   $[\text{M}+\text{Na}]^+$  329.1108, found 329.1112.



### 2.2.5 Synthesis and characterization of (4*S*,5*S*)-*tert*-butyl 5-(4-bromophenyl)-5-methyl-4,5-dihydrooxazole-4-carboxylate **4e**.

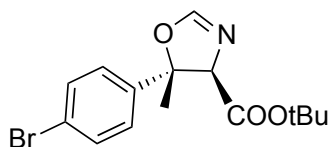

The general procedure was followed. The desired product was obtained as a colorless oil in 71% yield (85 mg, trans:cis=89:11; data for the trans diastereoisomer); The er was determined by HPLC using a Chiralpack AD-H [hexane/iso-propanol 90:10,  $\lambda$  220, 1 mL/min] t (major) = 6.87 min., t (minor) = 8.13 min. (95:5).  $[\alpha]_D^{20} = -102$  (*c* 1.00, CHCl<sub>3</sub>); <sup>1</sup>H NMR (400 MHz, C<sub>6</sub>D<sub>6</sub>)  $\delta$  1.30 (s, 9H), 1.49 (s, 3H), 4.64 (d, *J* = 2.0 Hz, 1H), 6.54 (d, *J* = 2.0 Hz, 1H), 7.09 (d, *J* = 8.5 Hz, 2H), 7.22 (d, *J* = 8.5 Hz, 2H); <sup>13</sup>C NMR (100 MHz, C<sub>6</sub>D<sub>6</sub>)  $\delta$  24.3 (CH<sub>3</sub>), 27.5 (3xCH<sub>3</sub>), 78.3 (CH), 81.5 (C), 86.8 (C), 121.6 (C), 125.9 (2xCH), 131.6 (2xCH), 144.8 (C), 154.4 (CH), 167.9 (C); IR  $\nu_{\max}/\text{cm}^{-1}$  1739, 1630, 1148, 1060; HRMS (ES) calcd C<sub>15</sub>H<sub>19</sub>BrNO<sub>3</sub> [M+H]<sup>+</sup> 340.0543, found 340.0548.

### 2.2.6 Synthesis and characterization of (4*S*,5*S*)-*tert*-butyl 5-(4-cyanophenyl)-5-methyl-4,5-dihydrooxazole-4-carboxylate **4f**.

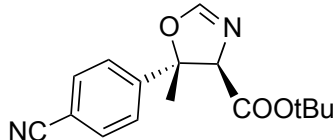

The general procedure was followed. The desired product was obtained as a colorless oil in 80% yield (80 mg, trans:cis=90:10; data for the trans diastereoisomer); The ee was determined by HPLC using a Chiralpack OD-H [hexane/iso-propanol 90:10,  $\lambda$  220, 1 mL/min] t (minor) = 11.90 min., t (major) = 14.80 min (96:4).  $[\alpha]_D^{20} = -33.7$  (*c* 1.00, CHCl<sub>3</sub>); <sup>1</sup>H NMR (400 MHz, C<sub>6</sub>D<sub>6</sub>)  $\delta$  1.30 (s, 9H), 1.42 (s, 3H), 4.52 (d, *J* = 2.0 Hz, 1H), 6.50 (d, *J* = 2.0 Hz, 1H), 7.00 (d, *J* = 8.5 Hz, 2H), 7.10 (d, *J* = 8.5 Hz, 2H); <sup>13</sup>C NMR (100 MHz, C<sub>6</sub>D<sub>6</sub>)  $\delta$  24.1 (CH<sub>3</sub>), 27.5 (3xCH<sub>3</sub>), 78.1 (CH), 81.7 (C), 86.6 (C), 111.8 (C), 124.6 (2xCH), 132.1 (2xCH), 149.9 (C), 154.2 (CH), 167.7 (C), 118.2 (C); IR  $\nu_{\max}/\text{cm}^{-1}$  1739, 1366, 1216; HRMS (ES) calcd C<sub>16</sub>H<sub>18</sub>N<sub>2</sub>O<sub>3</sub>Na [M+Na]<sup>+</sup> 309.1210, found 309.1217.

### 2.2.7 Synthesis and characterization of (4*R*,5*S*)-*tert*-butyl 5-(3-bromo-4-fluorophenyl)-5-methyl-4,5-dihydrooxazole-4-carboxylate **4g**.

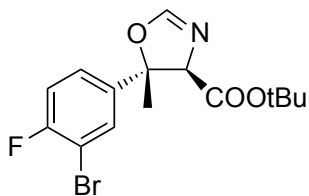

The general procedure was followed. The desired product was obtained as a colorless oil in 83% yield (104 mg, trans:cis=85:15; data for the trans diastereoisomer); The er was determined by HPLC using a Chiralpack OD-H [hexane/iso-propanol 90:10,  $\lambda$  220, 1 mL/min] t (major) = 5.93 min., t (minor) = 6.48 min. (89:11).  $[\alpha]_D^{20} = -50.78$  (*c* 1.28, CHCl<sub>3</sub>); <sup>1</sup>H NMR (400 MHz, C<sub>6</sub>D<sub>6</sub>)  $\delta$  1.30 (s, 9H), 1.41 (s, 3H), 4.55 (d, *J* = 2.0 Hz, 1H), 6.46 (d, *J* = 2.0 Hz, 1H), 6.60 (app t, *J* = 8.5 Hz, 1H), 7.04 (ddd, *J* = 8.5 Hz, *J* = 6.3 Hz, *J* = 2.3 Hz, 1H), 7.67 (dd, *J* = 6.5 Hz, *J* = 2.3 Hz, 1H); <sup>13</sup>C NMR (100 MHz, C<sub>6</sub>D<sub>6</sub>)  $\delta$  24.6 (CH<sub>3</sub>), 27.5 (3xCH<sub>3</sub>), 78.2 (CH), 81.7 (C), 86.2 (C), 109.2 (d, <sup>2</sup>*J*<sub>CF</sub> = 22.0 Hz, C), 116.4 (d, <sup>2</sup>*J*<sub>CF</sub> = 21.0 Hz, CH), 124.9 (d, <sup>3</sup>*J*<sub>CF</sub> = 7.6 Hz, CH), 129.6 (s, CH), 143.2 (d, <sup>4</sup>*J*<sub>CF</sub> = 4.0 Hz, C), 154.2 (CH), 158.4 (d, <sup>1</sup>*J*<sub>CF</sub> = 254.0 Hz, C), 167.7 (C); IR  $\nu_{\max}/\text{cm}^{-1}$  1724, 1369, 1216; HRMS (ES) calcd C<sub>15</sub>H<sub>17</sub>BrFNO<sub>3</sub>Na [M+Na]<sup>+</sup> 380.0268, found 380.0274.

**2.2.8 Synthesis and characterization of (4*R*,5*S*)-*tert*-butyl 5-(3,5-bis(trifluoromethyl)phenyl)-5-methyl-4,5-dihydrooxazole-4-carboxylate 4h.** The general procedure was followed. The desired product was obtained as a colorless oil in 82% yield (114 mg, trans:cis=86:14; data for the trans diastereoisomer); The er was determined by HPLC using a Chiralpack AD-H [hexane/iso-propanol 90:10,  $\lambda$  220, 1 mL/min] t (major) = 5.81 min., t (minor) = 6.41 min. (88:12).  $[\alpha]_D^{20} = -26.6$  ( $c$  0.5,  $\text{CHCl}_3$ );  $^1\text{H NMR}$  (400 MHz,  $\text{C}_6\text{D}_6$ )  $\delta$  1.29 (s, 9H), 1.40 (s, 3H), 4.54 (d,  $J = 2.0$  Hz, 1H), 6.41 (d,  $J = 2.0$  Hz, 1H), 6.95-6.98 (m, 2H), 7.54 (app d,  $J = 2.0$  Hz, 1H);  $^{13}\text{C NMR}$  (100 MHz,  $\text{C}_6\text{D}_6$ )  $\delta$  24.4 ( $\text{CH}_3$ ), 27.5 ( $3\times\text{CH}_3$ ), 78.1 (CH), 81.7 (C), 86.2 (C), 123.6 (CH), 126.4 (CH), 130.6 (CH), 131.7 (C), 132.8 (C), 145.9 (C), 154.2 (CH), 167.7 (C); IR  $\nu_{\text{max}}/\text{cm}^{-1}$  1736, 1666, 1370, 1155; HRMS (ES) calcd  $\text{C}_{17}\text{H}_{17}\text{F}_6\text{NNaO}_3$   $[\text{M}+\text{H}]^+$  420.1008, found 420.1005.

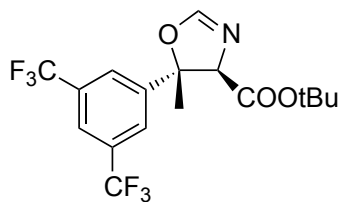

**2.2.9 Synthesis and characterization of (4*R*,5*R*)-*tert*-butyl 5-methyl-5-(5-methylthiazol-2-yl)-4,5-dihydrooxazole-4-carboxylate 4i.** The general procedure was followed. The desired product was obtained as a colorless oil in 55% yield (54 mg, trans:cis=91:9; data for the trans diastereoisomer); The er was determined by HPLC using a Chiralpack AD-H [hexane/iso-propanol 90:10,  $\lambda$  220, 1 mL/min] t (major) = 7.60 min., t (minor) = 9.37 min. (93:7).  $[\alpha]_D^{20} = -101$  ( $c$  1.00,  $\text{CHCl}_3$ );  $^1\text{H NMR}$  (400 MHz,  $\text{C}_6\text{D}_6$ )  $\delta$  1.27 (s, 9H), 1.87 (s, 3H), 2.14 (s, 3H), 5.42 (d,  $J = 2.0$  Hz, 1H), 6.20 (d,  $J = 2.0$  Hz, 1H), 6.58 (d,  $J = 2.0$  Hz, 1H);  $^{13}\text{C NMR}$  (100 MHz,  $\text{C}_6\text{D}_6$ )  $\delta$  16.7 ( $\text{CH}_3$ ), 22.5 ( $\text{CH}_3$ ), 27.5 ( $3\times\text{CH}_3$ ), 77.1 (CH), 81.5 (C), 86.5 (C), 113.8 (CH), 153.2 (C), 154.8 (CH), 167.6 (C), 172.8 (C); IR  $\nu_{\text{max}}/\text{cm}^{-1}$  1738, 1632, 1369, 1152; HRMS (ES) calcd  $\text{C}_{13}\text{H}_{18}\text{N}_2\text{NaO}_3\text{S}$   $[\text{M}+\text{Na}]^+$  305.0930, found 305.0931.

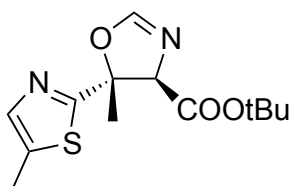

**2.2.10 Synthesis and characterization of (4*R*,5*R*)-*tert*-butyl 5-methyl-5-(pyrazin-2-yl)-4,5-dihydrooxazole-4-carboxylate 4j.** The general procedure was followed. The desired product was obtained as a colorless oil in 75% yield (69 mg, trans:cis=91:9; data for the trans diastereoisomer); The er was determined by HPLC using a Chiralpack OD-H [hexane/iso-propanol 90:10,  $\lambda$  220, 1 mL/min] t (minor) = 11.19 min., t (major) = 15.38 min. (91:9).  $[\alpha]_D^{20} = -62.4$  ( $c$  1.00,  $\text{CHCl}_3$ );  $^1\text{H NMR}$  (200 MHz,  $\text{C}_6\text{D}_6$ )  $\delta$  1.30 (s, 9H), 1.70 (s, 3H), 5.20 (d,  $J = 2.0$  Hz, 1H), 6.52 (d,  $J = 2.0$  Hz, 1H), 7.86 (dd,  $J = 2.5$  Hz,  $J = 1.5$  Hz, 1H), 7.95 (d,  $J = 2.5$  Hz, 1H), 8.69 (d,  $J = 1.5$  Hz, 1H);  $^{13}\text{C NMR}$  (50 MHz,  $\text{C}_6\text{D}_6$ )  $\delta$  22.8 ( $\text{CH}_3$ ), 28.3 ( $3\times\text{CH}_3$ ), 77.0 (CH), 82.1 (C), 87.6 (C), 141.9 (CH), 144.1 (CH), 144.7 (CH), 155.8 (CH), 158.7 (C), 168.6 (C); IR  $\nu_{\text{max}}/\text{cm}^{-1}$  1738, 1632, 1154; HRMS (ES) calcd  $\text{C}_{13}\text{H}_{17}\text{N}_3\text{NaO}_3$   $[\text{M}+\text{Na}]^+$  286.1162, found 286.1175.

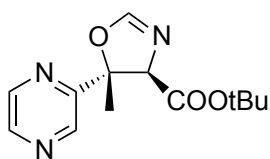

### 2.2.11 Synthesis and characterization of (4*S*,5*S*)-*tert*-butyl 5-ethyl-5-phenyl-4,5-dihydrooxazole-4-carboxylate **4k**.

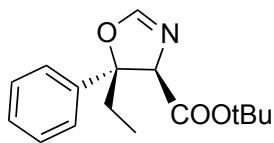

obtained as a colorless oil in 73 yield (71 mg, trans:cis=90:10; data for the trans diastereoisomer); The er was determined by HPLC using a Chiralpack AD-H [hexane/iso-propanol 90:10,  $\lambda$  220, 1 mL/min] t (major) = 5.35 min., t (minor) = 7.93 min (99:1).  $[\alpha]_D^{20} = -51.6$  (*c* 0.5, CHCl<sub>3</sub>); <sup>1</sup>H

NMR (400 MHz, C<sub>6</sub>D<sub>6</sub>)  $\delta$  0.75 (t, *J* = 7.5 Hz, 3H), 1.33 (s, 9H), 1.95-2.05 (m, 1H), 2.08-2.18 (m, 1H), 4.81 (d, *J* = 2.0 Hz, 1H), 6.63 (d, *J* = 2.0 Hz, 1H), 7.03-7.08 (m, 1H), 7.13-7.18 (m, 2H), 7.42-7.47 (m, 2H); <sup>13</sup>C NMR (100 MHz, C<sub>6</sub>D<sub>6</sub>)  $\delta$  8.3 (CH<sub>3</sub>), 27.6 (3xCH<sub>3</sub>), 30.0 (CH<sub>2</sub>), 79.2 (CH), 81.2 (C), 90.2 (C), 124.1 (2xCH), 127.5 (CH), 128.6 (2xCH), 146.1 (C), 154.8 (C), 168.3 (C); IR  $\nu_{\max}/\text{cm}^{-1}$  1787, 1687, 1152, 701; HRMS (ES) calcd C<sub>15</sub>H<sub>22</sub>NO<sub>3</sub> [M+H]<sup>+</sup> 276.1594, found 276.1597.

### 2.2.12 Synthesis and characterization of (4*R*,5*S*)-*tert*-butyl 5-ethyl-5-(*p*-tolyl)-4,5-dihydrooxazole-4-carboxylate **4l**.

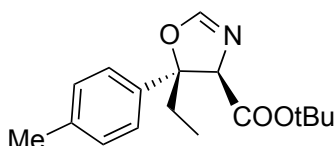

obtained as a colorless oil in 81% yield (82 mg, trans:cis=91:9; data for the trans diastereoisomer); The er was determined by HPLC using a Chiralpack AD-H [hexane/iso-propanol 90:10,  $\lambda$  220, 1 mL/min] t (major) = 6.69 min., t (minor) = 14.12 min (98:2).  $[\alpha]_D^{20} = +80.5$  (*c* 1.0, CHCl<sub>3</sub>); <sup>1</sup>H NMR (400 MHz, C<sub>6</sub>D<sub>6</sub>)  $\delta$  0.81 (t, *J* = 8.0 Hz, 3H), 1.35 (s, 9H), 1.99-2.07 (m, 1H), 2.09 (s, 3H), 2.13-2.21 (m, 1H), 4.86 (d, *J* = 2.0 Hz, 1H), 6.63 (d, *J* = 2.0 Hz, 1H), 6.99 (d, *J* = 8.0 Hz, 1H), 7.38 (d, *J* = 8.0 Hz, 1H); <sup>13</sup>C NMR (100 MHz, C<sub>6</sub>D<sub>6</sub>)  $\delta$  8.3 (CH<sub>3</sub>), 20.6 (CH<sub>3</sub>), 27.6 (3xCH<sub>3</sub>), 30.0 (CH<sub>2</sub>), 79.4 (CH), 81.1 (C), 90.3 (C), 124.6 (2xCH), 129.1 (2xCH), 136.7 (C), 141.2 (C), 154.5 (CH), 168.3 (C); IR  $\nu_{\max}/\text{cm}^{-1}$  2977, 1744, 1636, 1153; HRMS (ES) calcd C<sub>17</sub>H<sub>24</sub>NO<sub>3</sub> [M+H]<sup>+</sup> 290.1751, found 290.1756.

### 2.2.13 Synthesis and characterization of (4*R*,5*S*)-*tert*-butyl 5-ethyl-5-(4-fluorophenyl)-4,5-dihydrooxazole-4-carboxylate **4m**.

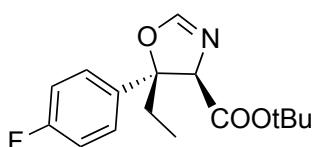

obtained as a colorless oil in 83% yield (85 mg, trans:cis=88:12; data for the trans diastereoisomer); The er was determined by HPLC using a Chiralpack AD-H [hexane/iso-propanol 90:10,  $\lambda$  220, 1 mL/min] t (major) = 4.98 min., t (minor) = 7.02 min (99:1).  $[\alpha]_D^{20} = -44.5$  (*c* 1.34, CHCl<sub>3</sub>); <sup>1</sup>H NMR (400 MHz, C<sub>6</sub>D<sub>6</sub>)  $\delta$  0.69 (t, *J* = 8.0 Hz, 3H), 1.34 (s, 9H), 1.84-1.93 (m, 1H), 2.02-2.11 (m, 1H), 4.70 (d, *J* = 2.0 Hz, 1H), 6.59 (d, *J* = 2.0 Hz, 1H), 6.65-6.75 (m, 2H), 7.21-7.25 (m, 2H); <sup>13</sup>C NMR (100 MHz, C<sub>6</sub>D<sub>6</sub>)  $\delta$  8.3 (CH<sub>3</sub>), 27.5 (3xCH<sub>3</sub>), 30.0 (CH<sub>2</sub>), 79.2 (CH), 81.4 (C), 89.8 (C), 115.2 (d, *J*<sub>CF</sub> = 21.0 Hz, CH), 126.5 (d, *J*<sub>CF</sub> = 8.0 Hz, CH), 139.6 (d, *J*<sub>CF</sub> = 3.0 Hz, C), 154.4 (CH), 162.1 (d, *J*<sub>CF</sub> = 243.0 Hz, C), 168.1 (C); IR  $\nu_{\max}/\text{cm}^{-1}$  2978, 1674, 1510, 1153; HRMS (ES) calcd C<sub>16</sub>H<sub>20</sub>FNNaO<sub>3</sub> [M+Na]<sup>+</sup> 316.1319, found 316.1320.

**2.2.14 Synthesis and characterization of (4*R*,5*S*)-*tert*-butyl 5-(4-bromophenyl)-5-ethyl-4,5-dihydrooxazole-4-carboxylate 4n.** The general procedure was followed. The desired product was

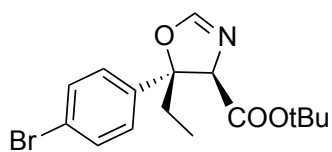

obtained as a colorless oil in 73% yield (90 mg, trans:cis=90:10; data for the trans diastereoisomer); The er was determined by HPLC using a Chiralpack AD-H [hexane/iso-propanol 90:10,  $\lambda$  220, 1 mL/min] t (major) = 5.81 min., t (minor) = 8.97 min (99:1).  $[\alpha]_D^{20} = -110.8$  (*c* 1.0, CHCl<sub>3</sub>);

<sup>1</sup>H NMR (400 MHz, C<sub>6</sub>D<sub>6</sub>)  $\delta$  0.67 (t, *J* = 8.0 Hz, 3H), 1.33 (s, 9H), 1.81-1.90 (m, 1H), 2.00-2.09 (m, 1H), 4.65 (d, *J* = 2.0 Hz, 1H), 6.54 (d, *J* = 2.0 Hz, 1H), 7.09 (d, *J* = 8 Hz, 2H), 7.24 (d, *J* = 8 Hz, 2H); <sup>13</sup>C NMR (100 MHz, C<sub>6</sub>D<sub>6</sub>)  $\delta$  8.1 (CH<sub>3</sub>), 27.5 (3xCH<sub>3</sub>), 29.7 (CH<sub>2</sub>), 79.0 (CH), 81.4 (C), 89.7 (C), 121.4 (C), 126.5 (2xCH), 131.6 (2xCH), 142.9 (C), 154.3 (CH), 167.9 (C); IR  $\nu_{\max}/\text{cm}^{-1}$  2970, 1739, 1368, 1216; HRMS (ES) calcd C<sub>16</sub>H<sub>21</sub>NBrO<sub>3</sub> [M+H]<sup>+</sup> 354.0699, found 354.0691.

**2.2.15 Synthesis and characterization of (4*R*,5*S*)-*tert*-butyl 5-phenyl-5-propyl-4,5-dihydrooxazole-4-carboxylate 4o.** The general procedure was followed. The desired product was

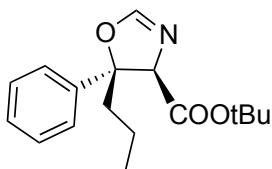

obtained as a colorless oil in 79% yield (80 mg, trans:cis=87:13; data for the trans diastereoisomer); The er was determined by HPLC using a Chiralpack AD-H [hexane/iso-propanol 90:10,  $\lambda$  220, 1 mL/min] t (major) = 4.93 min., t (minor) = 7.20 min (99:1).  $[\alpha]_D^{20} = +89.2$  (*c* 1.0, CHCl<sub>3</sub>);

<sup>1</sup>H NMR (400 MHz, C<sub>6</sub>D<sub>6</sub>)  $\delta$  0.70 (t, *J* = 8.0 Hz, 3H), 1.00-1.12 (m, 1H), 1.37 (s, 9H), 1.40-1.46 (m, 1H), 1.98-2.17 (m, 2H), 4.85 (d, *J* = 2.0 Hz, 1H), 6.61 (d, *J* = 2.0 Hz, 1H), 7.04-7.07 (m, 1H), 7.14-7.18 (m, 2H), 7.47-7.49 (m, 2H); <sup>13</sup>C NMR (100 MHz, C<sub>6</sub>D<sub>6</sub>)  $\delta$  13.8 (CH<sub>3</sub>), 17.5 (CH<sub>2</sub>), 27.6 (3xCH<sub>3</sub>), 39.5 (CH<sub>2</sub>), 79.4 (CH), 81.3 (C), 89.8 (C), 124.5 (2xCH), 127.2 (CH), 128.4 (2xCH), 144.6 (C), 154.5 (CH), 168.3 (C); IR  $\nu_{\max}/\text{cm}^{-1}$  2962, 1635, 1153

**2.2.16 Synthesis and characterization of (4*R*,5*R*)-*tert*-butyl 5-propyl-5-(thiophen-2-yl)-4,5-dihydrooxazole-4-carboxylate 4p.** The general procedure was followed. The desired product was

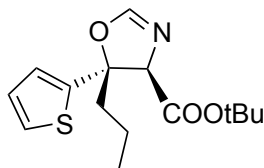

obtained as a colorless oil in 81% yield (84 mg, trans:cis=84:16; data for the trans diastereoisomer); The er was determined by HPLC using a Chiralpack AD-H [hexane/iso-propanol 90:10,  $\lambda$  220, 1 mL/min] t (major) = 5.93 min., t (minor) = 8.22 min (96:4).  $[\alpha]_D^{20} = -29.8$  (*c* 0.5, CHCl<sub>3</sub>);

<sup>1</sup>H NMR (400 MHz, C<sub>6</sub>D<sub>6</sub>)  $\delta$  0.73 (t, *J* = 8.0 Hz, 3H), 1.12-1.32 (m, 1H), 1.35 (s, 9H), 1.44-1.53 (m, 1H), 2.02-2.16 (m, 2H), 4.89 (d, *J* = 2.0 Hz, 1H), 6.54 (d, *J* = 2.0 Hz, 1H), 6.69 (dd, *J* = 5.0 Hz, *J* = 3.5 Hz, 1H), 6.79 (dd, *J* = 5.0 Hz, *J* = 1.0 Hz, 1H), 6.92 (dd, *J* = 3.5 Hz, *J* = 1.0 Hz, 1H); <sup>13</sup>C NMR (100 MHz, C<sub>6</sub>D<sub>6</sub>)  $\delta$  13.8 (CH<sub>3</sub>), 17.6 (CH<sub>2</sub>), 27.5 (3xCH<sub>3</sub>), 39.6 (CH<sub>2</sub>), 79.8 (CH), 81.3 (C), 88.7 (C), 122.9 (CH), 124.2 (CH), 126.9 (CH), 148.1 (C), 154.4 (CH), 167.7 (C); IR  $\nu_{\max}/\text{cm}^{-1}$  2969, 1742, 1634, 1368, 1153; HRMS (ES) calcd C<sub>15</sub>H<sub>21</sub>NNaO<sub>3</sub>S [M+Na]<sup>+</sup> 318.1134, found 318.1135.

**2.2.17 Synthesis and characterization of (4*R*,5*S*)-*tert*-butyl 5-isobutyl-5-phenyl-4,5-dihydrooxazole-4-carboxylate 4q.** The general procedure was followed. The desired product was

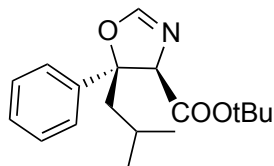

obtained as a colorless oil in 75% yield (80 mg, trans:cis=96:4; data for the trans diastereoisomer); The er was determined by HPLC using a Chiralpack AD-H [hexane/iso-propanol 90:10,  $\lambda$  220, 1 mL/min] t (minor) = 5.77 min., t (major) = 7.10 min (97:3).  $[\alpha]_D^{20} = -69$  ( $c$  1.0,  $\text{CHCl}_3$ );  $^1\text{H}$  NMR (400 MHz,  $\text{C}_6\text{D}_6$ )  $\delta$  0.62 (d,  $J = 8.0$  Hz, 3H), 0.92 (d,  $J = 8.0$  Hz, 3H), 1.38 (s, 9H), 1.48-1.60 (m, 1H), 1.99 (dd,  $J = 14.0$  Hz,  $J = 8.0$  Hz, 1H), 2.15 (dd,  $J = 14.0$  Hz,  $J = 4.0$  Hz, 1H), 4.80 (d,  $J = 2.0$  Hz, 1H), 6.64 (d,  $J = 1.0$  Hz, 1H), 7.02-7.06 (m, 1H), 7-13-7.16 (m, 1H), 7.43-7.47 (m, 2H);  $^{13}\text{C}$  NMR (100 MHz,  $\text{C}_6\text{D}_6$ )  $\delta$  22.9 ( $\text{CH}_3$ ), 24.1 ( $\text{CH}_3$ ), 24.6 ( $\text{CH}_3$ ), 27.6 ( $3\times\text{CH}_3$ ), 45.3 ( $\text{CH}_2$ ), 80.7 (CH), 81.2 (C), 90.0 (C), 124.4 ( $2\times\text{CH}$ ), 127.2 (CH), 128.5 ( $2\times\text{CH}$ ), 144.6 (C), 154.7 (CH), 168.2 (C); IR  $\nu_{\text{max}}/\text{cm}^{-1}$  2956, 1637, 1150; HRMS (ES) calcd  $\text{C}_{18}\text{H}_{25}\text{NNaO}_3$   $[\text{M}+\text{Na}]^+$  326.1727, found 326.1729.

**2.1.18 Synthesis and characterization of (4*R*,5*S*)-ethyl 5-ethyl-5-phenyl-4,5-dihydrooxazole-4-carboxylate 4r.** The general procedure was followed. The desired product was obtained as a

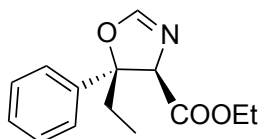

colorless oil in 81% yield (70 mg, trans:cis=90:10; data for the trans diastereoisomer); The er was determined by HPLC using a Chiralpack AD-H [hexane/iso-propanol 90:10,  $\lambda$  220, 1 mL/min] t (major) = 7.51 min., t (minor) = 10.19 min (99:1).  $[\alpha]_D^{20} = -89.0$  ( $c$  0.76,  $\text{CHCl}_3$ );  $^1\text{H}$  NMR (400

MHz,  $\text{C}_6\text{D}_6$ )  $\delta$  0.72 (t,  $J = 4.0$  Hz, 3H), 0.92 (t,  $J = 4.0$  Hz, 3H), 1.87-1.96 (m, 1H), 2.00-2.08 (m, 1H), 3.93-3.99 (m, 2H), 4.89 (d,  $J = 1.0$  Hz, 1H), 6.63 (d,  $J = 1.0$  Hz, 1H), 7.03-7.06 (m, 1H), 7.12-7.16 (m, 2H), 7.41-7.43 (m, 2H);  $^{13}\text{C}$  NMR (100 MHz,  $\text{C}_6\text{D}_6$ )  $\delta$  8.2 ( $\text{CH}_3$ ), 13.8 ( $\text{CH}_3$ ), 30.1 ( $\text{CH}_2$ ), 60.7 ( $\text{CH}_2$ ), 78.7 (CH), 90.2 (C), 124.6 ( $2\times\text{CH}$ ), 127.3 (CH), 128.5 ( $2\times\text{CH}_2$ ), 143.8 (C), 154.8 (CH), 169.1 (C); IR  $\nu_{\text{max}}/\text{cm}^{-1}$  2956, 1637, 1150; HRMS (ES) calcd  $\text{C}_{14}\text{H}_{18}\text{NO}_3$   $[\text{M}+\text{H}]^+$  248.1281, found 248.1289.

**2.2.19 Synthesis and characterization of (4*R*,5*S*)-methyl 5-ethyl-5-(*p*-tolyl)-4,5-dihydrooxazole-4-carboxylate 4s.** The general procedure was followed. The desired product was

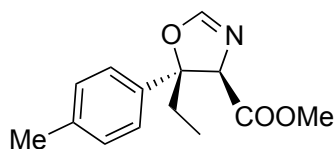

obtained as a colorless oil in 82% yield (71 mg, trans:cis=91:9; data for the trans diastereoisomer); The er was determined by HPLC using a Chiralpack AD-H [hexane/iso-propanol 90:10,  $\lambda$  220, 1 mL/min] t (major) = 7.74 min., t (minor) = 9.16 min (98:2).  $[\alpha]_D^{20} = -49.0$  ( $c$  0.1,  $\text{CHCl}_3$ );  $^1\text{H}$  NMR (400 MHz,  $\text{C}_6\text{D}_6$ )  $\delta$  0.73 (t,  $J = 4.0$  Hz, 3H), 1.81-1.88 (m, 1H), 1.90-2.01 (m, 1H), 2.08 (s, 3H), 3.33 (s, 3H), 4.90 (d,  $J = 2.0$  Hz, 1H), 6.63 (d,  $J = 1.0$

Hz, 1H), 6.97 (d,  $J = 8$  Hz, 2H), 7.30 (d,  $J = 8$  Hz, 2H);  $^{13}\text{C}$  NMR (100 MHz,  $\text{C}_6\text{D}_6$ )  $\delta$  8.2 ( $\text{CH}_3$ ), 20.6 ( $\text{CH}_3$ ), 30.0 ( $\text{CH}_2$ ), 51.2 ( $\text{CH}_3$ ), 78.8 (CH), 90.2 (C), 124.5 ( $2\times\text{CH}$ ), 129.2 ( $2\times\text{CH}$ ), 136.8 (C), 140.8 (C), 154.9 (CH), 169.6 (C); IR  $\nu_{\text{max}}/\text{cm}^{-1}$  1744, 1635, 1153; HRMS (ES) calcd  $\text{C}_{14}\text{H}_{17}\text{NNaO}_3$   $[\text{M}+\text{Na}]^+$  270.1101, found 270.1102.

**2.2.20 Synthesis and characterization of (4*R*,5*S*)-methyl 5-ethyl-5-phenyl-4,5-dihydrooxazole-4-carboxylate 4t.** The general procedure was followed. The desired product was obtained as a colorless oil in 77% yield (71 mg, trans:cis=91:9; data for the trans diastereoisomer); The er was determined by HPLC using a Chiralpack AD-H [hexane/iso-propanol 90:10,  $\lambda$  220, 1 mL/min] t (major) = 8.27 min., t (minor) = 10.84 min (99:1).  $[\alpha]_D^{20} = -54.3$  (*c* 1.0, CHCl<sub>3</sub>); <sup>1</sup>H NMR (400 MHz, C<sub>6</sub>D<sub>6</sub>)  $\delta$  0.68 (t, *J* = 4.0 Hz, 3H), 1.78-1.87 (m, 1H), 1.91-2.00 (m, 1H), 3.31 (s, 3H), 4.87 (d, *J* = 2.0 Hz, 1H), 6.60 (d, *J* = 1.0 Hz, 1H), 7.02-7.06 (m, 1H), 7.11-7.16 (m, 2H), 7.37-7.39 (m, 2H); <sup>13</sup>C NMR (100 MHz, C<sub>6</sub>D<sub>6</sub>)  $\delta$  8.1 (CH<sub>3</sub>), 30.1 (CH<sub>2</sub>), 51.2 (CH<sub>3</sub>), 78.7 (CH), 90.1 (C), 124.6 (2xCH), 127.3 (CH), 128.5 (2xCH), 143.7 (C), 154.8 (CH), 169.5 (C); IR  $\nu_{\max}/\text{cm}^{-1}$  1738, 1368, 1228, 1216; HRMS (ES) calcd C<sub>13</sub>H<sub>16</sub>NO<sub>3</sub> [M+H]<sup>+</sup> 234.1125, found 234.1129.

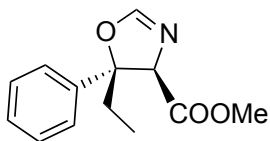

**2.1.21 Synthesis and characterization of (4*R*,5*R*)-methyl 5-(azidomethyl)-5-phenyl-4,5-dihydrooxazole-4-carboxylate 4u.** The general procedure was followed. The desired product was obtained as a colorless oil in 83% yield (75 mg, trans:cis=77:23; data for the trans diastereoisomer); The er was determined by HPLC using a Chiralpack AD-H [hexane/iso-propanol 90:10,  $\lambda$  220, 1 mL/min] t (major) = 14.03 min., t (minor) = 26.64 min (98:2).  $[\alpha]_D^{20} = -30.3$  (*c* 0.61, CHCl<sub>3</sub>); <sup>1</sup>H NMR (400 MHz, C<sub>6</sub>D<sub>6</sub>)  $\delta$  3.15 (d, *J* = 16.0 Hz, 1H), 3.39 (s, 3H), 3.44 (d, *J* = 16.0 Hz, 1H), 4.73 (d, *J* = 2.0 Hz, 1H), 6.48 (d, *J* = 1.0 Hz, 1H), 7.03-7.16 (m, 3H), 7.39 (d, *J* = 8.0 Hz, 2H); <sup>13</sup>C NMR (100 MHz, C<sub>6</sub>D<sub>6</sub>)  $\delta$  51.8 (CH), 56.0 (CH<sub>2</sub>), 76.0 (CH), 89.2 (C), 124.7 (2xCH), 127.9 (CH), 128.7 (2xCH), 141.5 (C), 154.1 (CH), 169.4 (C); IR  $\nu_{\max}/\text{cm}^{-1}$  1738, 1436, 1216; HRMS (ES) calcd C<sub>12</sub>H<sub>12</sub>N<sub>4</sub>O<sub>3</sub>Na [M+Na]<sup>+</sup> 283.0801, found 283.0795.

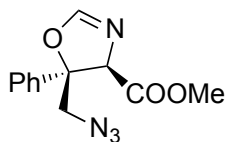

**2.1.22 Synthesis and characterization of (4*R*,5*S*)-methyl 5-(2-azidoethyl)-5-phenyl-4,5-dihydrooxazole-4-carboxylate 4v.** The general procedure was followed. The desired product was obtained as a colorless oil in 79% yield (63 mg, trans:cis=76:24; data for the trans diastereoisomer); The er was determined by HPLC using a Chiralpack AD-H [hexane/iso-propanol 90:10,  $\lambda$  220, 1 mL/min] t (major) = 13.10 min., t (minor) = 17.17 min (97:3).  $[\alpha]_D^{20} = -43.60$  (*c* 0.83, CHCl<sub>3</sub>); <sup>1</sup>H NMR (400 MHz, C<sub>6</sub>D<sub>6</sub>)  $\delta$  2.02-2.14 (m, 2H), 2.61-2.68 (m, 1H), 2.87-2.94 (m, 1H), 3.26 (s, 3H), 4.75 (d, *J* = 1.0 Hz, 1H), 6.48 (d, *J* = 1.0 Hz, 1H), 7.02-7.10 (m, 3H), 7.22-7.24 (m, 2H); <sup>13</sup>C NMR (100 MHz, C<sub>6</sub>D<sub>6</sub>)  $\delta$  35.9 (CH<sub>2</sub>), 46.7 (CH<sub>2</sub>), 51.4 (CH<sub>3</sub>), 79.1 (CH), 87.7 (C), 124.1 (2xCH), 127.8 (CH), 128.8 (2xCH), 142.6 (C), 154.6 (CH), 169.1 (C); IR  $\nu_{\max}/\text{cm}^{-1}$  2970, 1739, 1368, 1215; HRMS (ES) calcd C<sub>13</sub>H<sub>15</sub>N<sub>4</sub>O<sub>3</sub> [M+H]<sup>+</sup> 275.1138, found 275.1135.

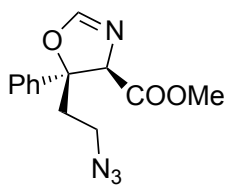

### 2.3 General procedure for the preparation of racemic oxazolines

Ag<sub>2</sub>O (6.1 mg, 0.026 mmol), PPh<sub>3</sub> (9.2 mg, 0.03 mmol) were dissolved in 2.0 mL of EtOAc in presence of powdered 4A MS. After that, Et<sub>3</sub>N (24  $\mu$ L, 0.17 mmol) and the ketone **3** (0.386 mmol, 1.1 equiv) was added. The heterogeneous mixture was cooled at -20 °C in a fridge and stirred for 30 min. After that, the isocyanate **2c** (50 mg, 0.351 mmol, 1.0 equiv) previously dissolved in 2.0 mL of EtOAc and cooled at -20 °C, was added. The reaction mixture was stirred at the same temperature for 72 h (time needed to the total consumption of the isocyanacetate, according with the TLC). The reaction mixture was then quickly filtered through a short pad of celite (in a glass pipette) and eluted with EtOAc. The filtrate was concentrated under reduce pressure and purified by flash column chromatography purified on silica gel using mixtures of petroleum ether/ethyl acetate (9/1→3/1→1/1) to yield racemic oxazolines **4** as pure compounds.

The racemic samples of **4l**, **4q**, **4r**, **4p**, **4t**, **4u**, **4v**, **5a** and **5b** were prepared by mixing equimolar of both enantiomers. The other enantiomer was synthesised in analogous fashion using the ligand **1b** (the pseudoenantiomer of **1a**) following the general procedure for the preparation the oxazolines **4**.

### 2.4 Synthesis and characterization of compounds **5**

#### 2.4.1 Syntesis and characterization of (3*aS*,6*aS*)-6*a*-phenyl-6,6*a*-dihydro-3*aH*-pyrrolo[3,4-*d*]oxazol-4(5*H*)-one **5a**

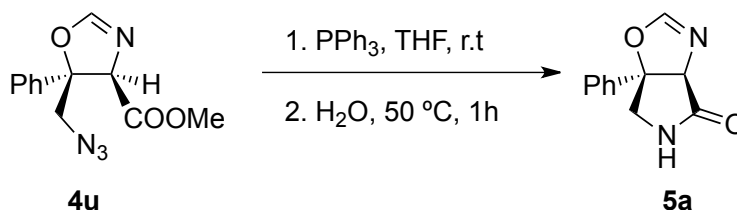

Oxazoline **4u** (146 mg, 0.56 mmol) was dissolved in 5 mL of dry THF and PPh<sub>3</sub> (147 mg, 0.56 mmol, 1.0 equiv) was added. The reaction mixture was stirring at room temperature for the time necessary to form the iminophosphorane product (following by mass spectrum). Then H<sub>2</sub>O (20  $\mu$ L, 1.12 mmol, 2.0 equiv) was added and the reaction mixture was heating at 50 °C for 1 h. After that, the reaction mixture was concentrated under reduce pressure and purified by chromatography column on silica gel using mixtures of petroleum ether/ethyl acetate (3/1→1/1→1/2) to yield the bicyclic product **5a** (94 mg, 83%) as a colorless oil compound. The er was determined by HPLC using a Chiralpack AD-H [hexane/iso-propanol 70:30,  $\lambda$  220, 1 mL/min] t (minor) = 8.85 min., t (minor) = 23.06 min (98:2).  $[\alpha]_D^{20}$ : +47 (c 0.1, CHCl<sub>3</sub>); <sup>1</sup>H NMR (400 MHz, CDCl<sub>3</sub>)  $\delta$  3.05 (d, *J* = 12.0 Hz, 1H), 3.10 (d, *J* = 12.0 Hz, 1H), 3.76 (s, 1H), 6.19 (s, 1H), 6.44-6.60 (m, 5H), 7.22 (s, 1H); <sup>13</sup>C NMR (100 MHz, CDCl<sub>3</sub>)  $\delta$  54.9 (CH<sub>2</sub>), 76.4 (CH), 88.8 (C), 123.4 (2xCH), 127.9 (CH), 128.4 (2xCH), 139.2 (C), 154.7 (CH), 172.8 (C); IR  $\nu_{\max}/\text{cm}^{-1}$  3262, 1708, 762; HRMS (ES) calcd C<sub>11</sub>H<sub>11</sub>N<sub>2</sub>O<sub>2</sub> [M+H]<sup>+</sup> 203.0815, found 203.0809.

## 2.4.2 Synthesis and characterization of (3*aS*,7*aR*)-7*a*-phenyl-5,6,7,7*a*-tetrahydrooxazolo[4,5-*c*]pyridin-4(3*aH*)-one **5b**

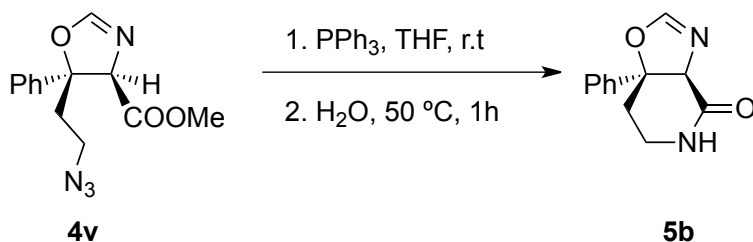

Oxazoline **4v** (95 mg, 0.35 mmol) was dissolved in 8 mL of dry THF and PPh<sub>3</sub> (92 mg, 0.35 mmol, 1.0 equiv) was added. The reaction mixture was stirring at room temperature for the time necessary to form the iminophosphorane product (following by mass spectrum). Then H<sub>2</sub>O (12.6  $\mu$ L, 0.7 mmol, 2.0 equiv) was added and the reaction mixture was heating at 50 °C for 1 h. After that, the reaction mixture was concentrated under reduced pressure and purified by chromatography column on silica gel using mixtures of petroleum ether/ethyl acetate (3/1→1/1→1/2) to yield the bicyclic product **5b** (55 mg, 73%) as a colorless oil. The er was determined by HPLC using a Chiralpack AD-H [hexane/iso-propanol 80:20,  $\lambda$  220, 1 mL/min] t (minor) = 11.64 min., t (major) = 23.76 min (97:3).  $[\alpha]_D^{20}$ : -5.00 (c 0.1, CHCl<sub>3</sub>); <sup>1</sup>H-NMR (CDCl<sub>3</sub>, 400 MHz)  $\delta$  2.13-2.28 (m, 2H), 3.18-3.28 (m, 1H), 3.32-3.38 (m, 1H), 4.58 (s, 1H), 7.08 (s, 1H), 7.27-7.35 (m, 5H), 7.78 (s, 1H); <sup>13</sup>C-NMR (CDCl<sub>3</sub>)  $\delta$  35.9 (CH<sub>2</sub>), 37.1 (CH<sub>2</sub>), 74.7 (CH), 87.5 (C), 124.3 (2xCH), 128.3 (CH), 128.9 (2xCH), 142.9 (C), 156.2 (CH), 169.0 (C); IR  $\nu_{\max}/\text{cm}^{-1}$  3258, 1670, 759; HRMS (ES) calcd C<sub>12</sub>H<sub>13</sub>N<sub>2</sub>O<sub>2</sub> [M+H]<sup>+</sup> 217.0967, found 217.0971.

## 2.5 Synthesis and characterization of compound **6**

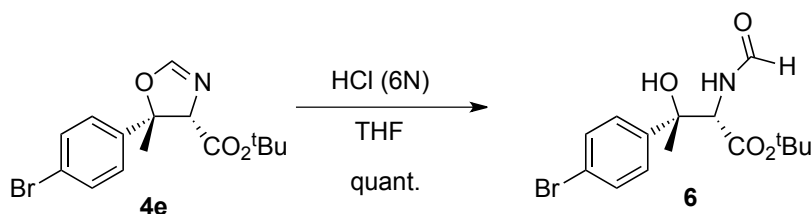

Oxazoline **4e** (50 mg, 0.2 mmol) was dissolved in 3 mL of THF and 5 pipette drops of HCl (6N) were added. The reaction mixture was stirred at room temperature for 4 h. Removal of volatiles under reduced pressure yielded the corresponding opened product **6** in quantitative yield. The er was determined by HPLC using a Chiralpack OD-H [hexane/iso-propanol (80:20,  $\lambda$  220, 1 mL/min] t (major) = 5.31 min., t (minor) = 8.01 min (95:5).  $[\alpha]_D^{20}$  = -48.0 (c 0.1, CHCl<sub>3</sub>); <sup>1</sup>H NMR (200 MHz, CDCl<sub>3</sub>)  $\delta$  1.47 (s, 9H), 1.59 (s, 3H), 3.68 (brs, 1H), 4.82 (d, *J* = 8 Hz, 1H), 6.41 (d, *J* = 8 Hz, 1H), 7.32 (d, *J* = 10 Hz, 2H), 7.46 (d, *J* = 8 Hz, 2H), 8.00 (s, 1H); <sup>13</sup>C NMR (50 MHz, CDCl<sub>3</sub>)  $\delta$  28.1 (CH<sub>3</sub>), 59.4 (CH<sub>3</sub>), 75.5 (C), 84.2 (C), 121.96 (C), 127.4 (2xCH), 131.8 (2xCH), 143.00 (C), 161.2 (CH), 170.6 (C); IR  $\nu_{\max}/\text{cm}^{-1}$  1728, 1243; HRMS (ES) calcd C<sub>15</sub>H<sub>20</sub>NNaBrO<sub>4</sub> [M+Na]<sup>+</sup> 380.0467, found 380.0461.



## 2.6 Synthesis and characterization of compound 7

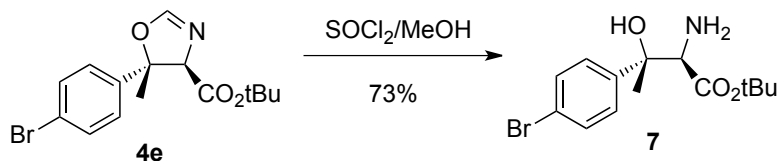

Oxazoline **4e** (281 mg, 0.82 mmol) was dissolved in 8 mL of dry MeOH. The reaction mixture was cooled to 0 °C and 8 mL of 1M solution of SOCl<sub>2</sub> in MeOH (2M HCl) were added dropwise. The solution was stirred 1h 45' at 0 °C and then the solvent was removed under reduced pressure. The resultant oil was dissolved in CH<sub>2</sub>Cl<sub>2</sub> (10 mL) and few drops of sat. NaHCO<sub>3</sub> solution were added under vigorous stirring until P<sub>H</sub> 8 (PH paper). The mixture was further diluted with CH<sub>2</sub>Cl<sub>2</sub> and dried with Na<sub>2</sub>SO<sub>4</sub>. The precipitates were filtered off and the resultant solution was concentrated under reduced pressure and the crude was purified by FCC (AcOEt/PE 2:1) to yield the amino-ester **7** (138 mg, 73%) as an oil compound. <sup>1</sup>H NMR (400 MHz, CDCl<sub>3</sub>) δ 1.31 (s, 9H), 1.44 (s, 3H), 3.45 (brs, 1H), 4.03 (brs, 1H), 5.22 (s, 1H), 7.28 (d, *J* = 10 Hz, 2H), 7.39 (d, *J* = 8 Hz, 2H); <sup>13</sup>C NMR (100 MHz, CDCl<sub>3</sub>) δ 25.2 (3xCH<sub>3</sub>), 27.9 (CH<sub>3</sub>), 53.5 (C), 63.4 (C), 82.3 (CH), 121.1 (C), 127.6 (2xCH), 131.1 (2xCH), 144.2 (C), 172.8 (C); IR ν<sub>max</sub>/cm<sup>-1</sup> 2978, 1725, 1368, 1156; HRMS (ES) calcd C<sub>14</sub>H<sub>20</sub>NNaBrO<sub>3</sub> [M+Na]<sup>+</sup> 352.0518, found 352.0513.

## 2.6 Synthesis and characterization of compound 8

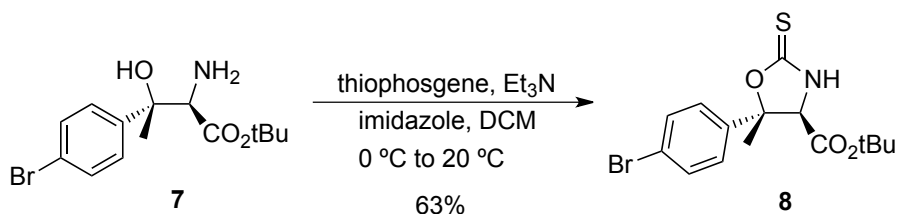

Amino-ester **7** (485 mg, 1.47 mmol) was dissolved in 40 mL of CH<sub>2</sub>Cl<sub>2</sub> and the solution was cooled to 0 °C. Then Et<sub>3</sub>N (0.20 mL, 1.44 mmol), imidazole (98.35 mg, 1.44 mmol) and thiophosgene (0.122 mL, 1.54 mmol) were added. The reaction mixture was stirred 12 h at 20 °C and then was washed with water (10 mL) and brine (10 mL) and finally dried with Na<sub>2</sub>SO<sub>4</sub>. The reaction mixture was filtered and the resultant solution concentrated under reduced pressure and purified by chromatography column on silica gel using mixtures of petroleum ether/ethyl acetate (3/1→1/1→1/2) to yield the cyclic product **8** (344 mg, 63%) as a solid compound. The product was recrystallized using EtOAc. The er after recrystallization was determined by HPLC using a Chiralpack AD-H [hexane/iso-propanol 90:10, λ 220, 1 mL/min] t (minor) = 9.73 min., t (major) = 21.58 min (99:1). [α]<sub>D</sub><sup>20</sup>: 82 (c 0.25, CHCl<sub>3</sub>); Mp = 175-177 °C; <sup>1</sup>H NMR (400 MHz, CDCl<sub>3</sub>) δ 1.48 (s, 9H), 1.68 (s, 3H), 4.45 (s, 1H), 7.32 (d, *J* = 8.0 Hz, 2H), 7.46 (d, *J* = 8.0 Hz, 2H), 8.03 (s, 1H); <sup>13</sup>C NMR (100 MHz, CDCl<sub>3</sub>) δ 24.3 (CH<sub>3</sub>), 28.0 (3x CH<sub>3</sub>), 68.2 (CH), 84.9 (C), 91.4 (C), 122.7 (C), 126.1 (2xCH), 132.0 (2xCH), 141.5 (C), 166.1

(C), 188.1 (C); IR  $\nu_{\text{max}}/\text{cm}^{-1}$  2979, 1743, 1491, 1230, 1152; HRMS (ES) calcd  $\text{C}_{15}\text{H}_{19}\text{NO}_3\text{BrS}$   $[\text{M}+\text{H}]^+$  372.0263, found 372.0260.

### 3 $^1\text{H}$ -NMR and $^{13}\text{C}$ -NMR spectra of pre-catalysts

#### 3.1 $^1\text{H}$ and $^{13}\text{C}$ -NMR spectra of compound 1a

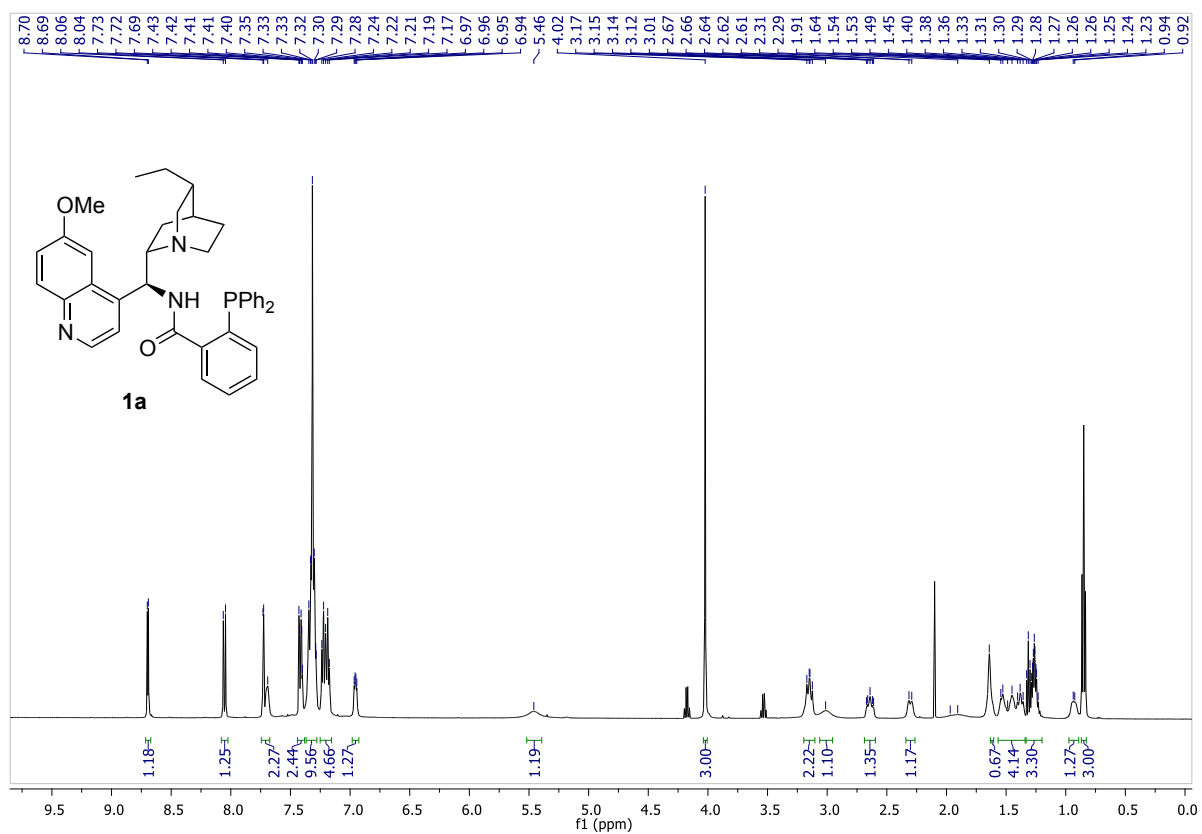

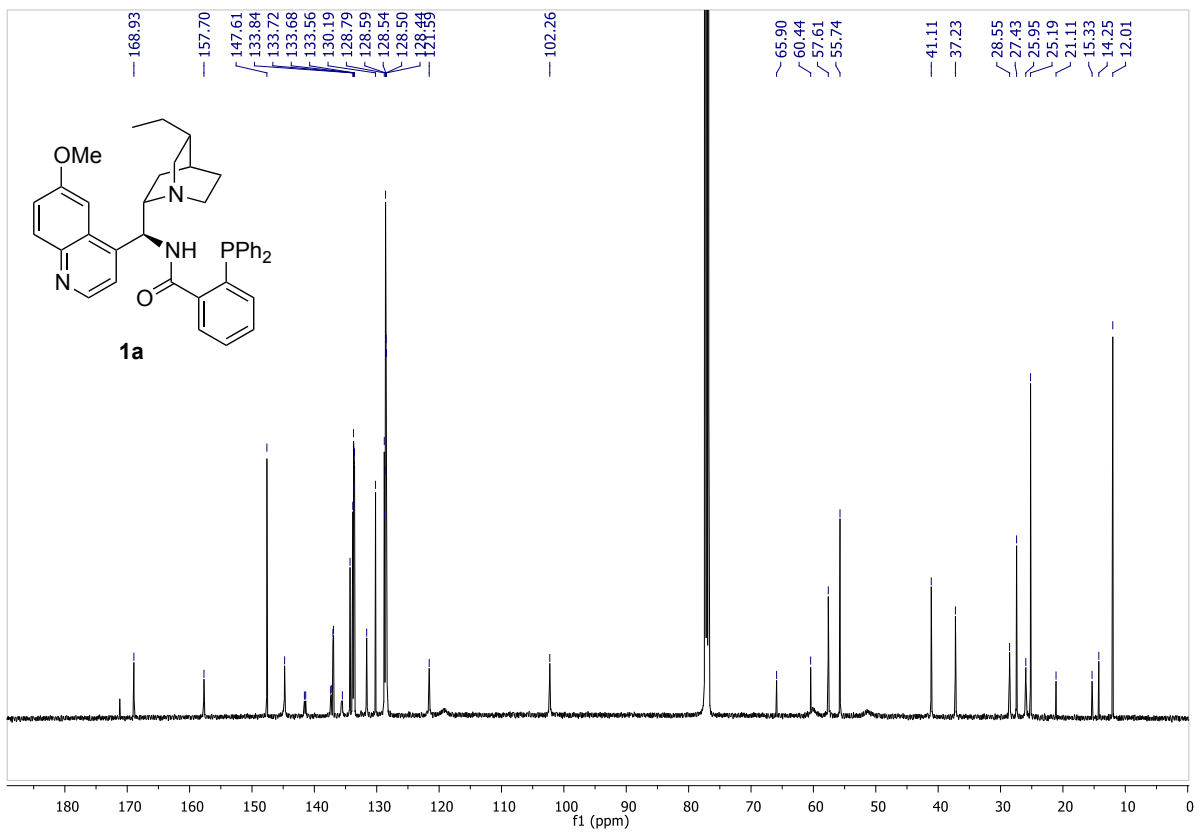

### 3.2 $^1\text{H}$ and $^{13}\text{C}$ -NMR spectra of compound **1b**

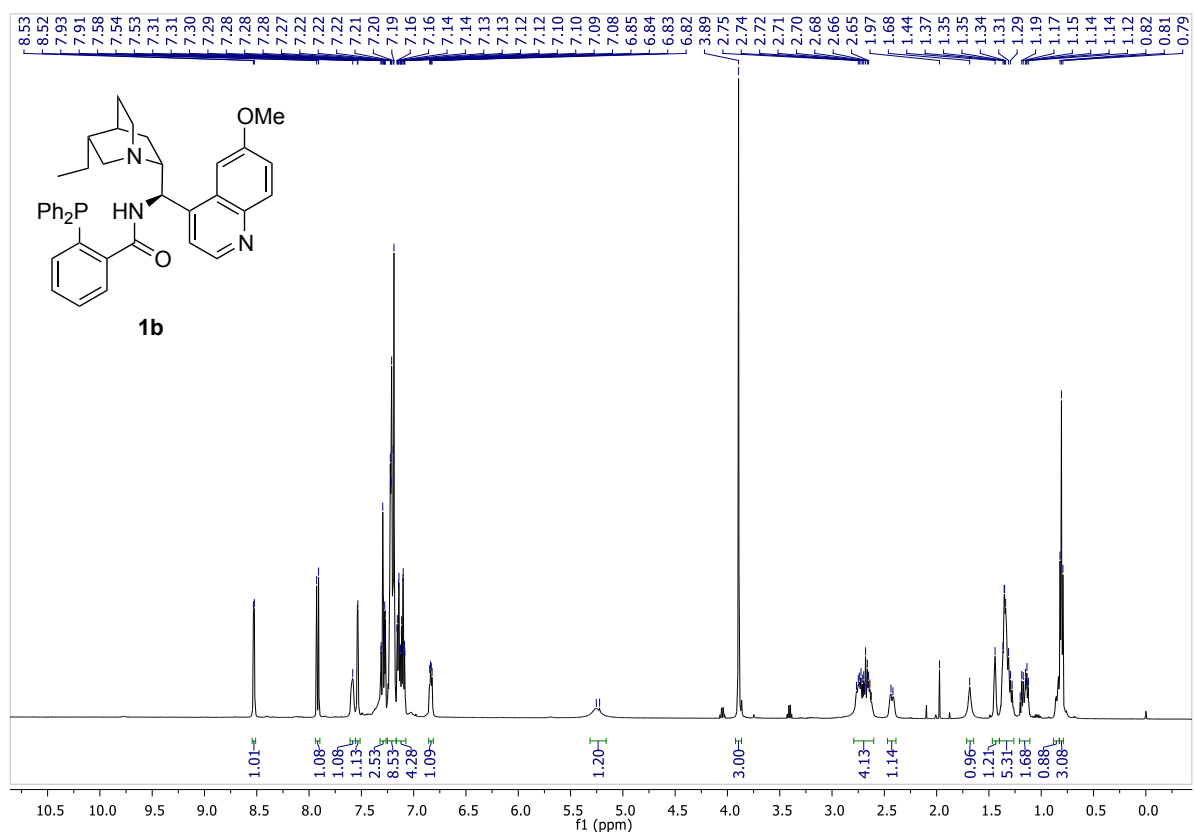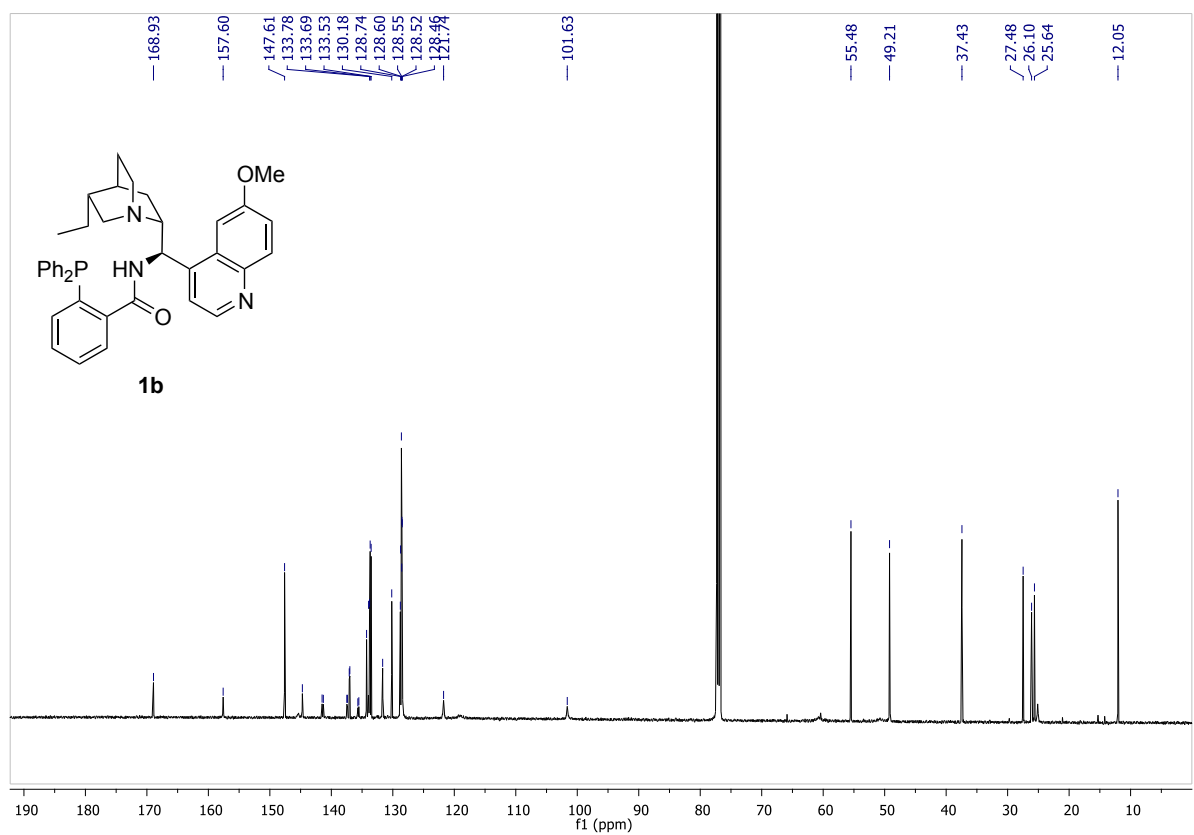

# 4 $^1\text{H}$ and $^{13}\text{C}$ -NMR spectra and HPLC traces of Oxazolines and hydrolyzed derivates

## 4.1 $^1\text{H}$ and $^{13}\text{C}$ -NMR spectra and HPLC traces of compound 4a

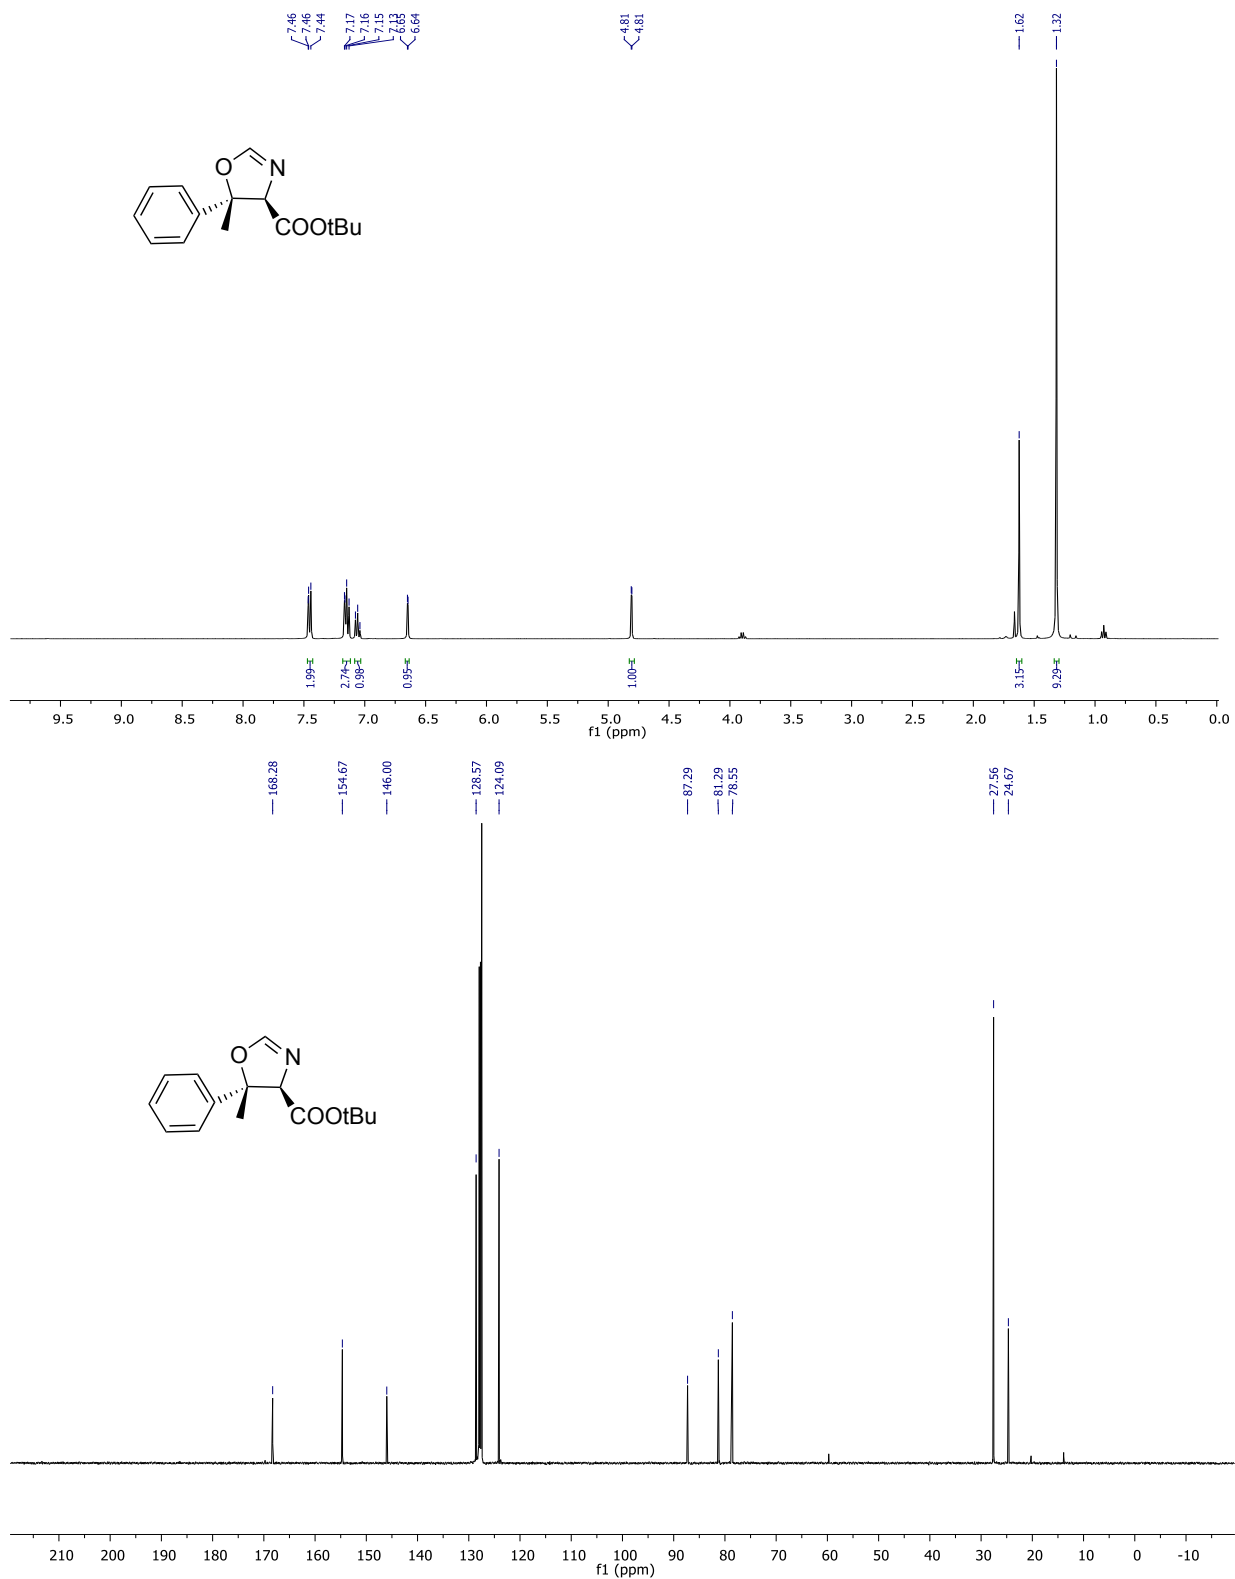

HPLC traces of racemic compound

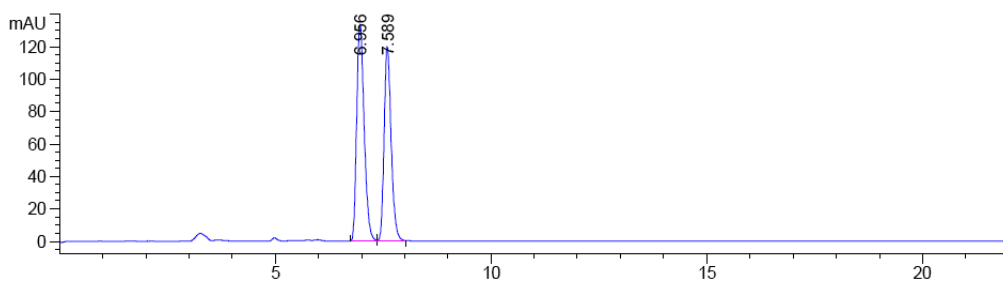

| Peak # | RetTime [min] | Type | Width [min] | Area [mAU*s] | Height [mAU] | Area %  |
|--------|---------------|------|-------------|--------------|--------------|---------|
| 1      | 6.956         | BV   | 0.1891      | 1612.92114   | 133.34767    | 54.3630 |
| 2      | 7.589         | VB   | 0.1740      | 1354.02734   | 119.70426    | 45.6370 |

Totals : 2966.94849 253.05193

HPLC traces of 4a

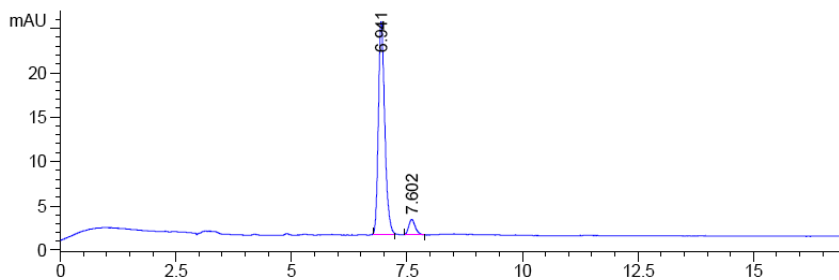

| Peak # | RetTime [min] | Type | Width [min] | Area [mAU*s] | Height [mAU] | Area %  |
|--------|---------------|------|-------------|--------------|--------------|---------|
| 1      | 6.941         | MM   | 0.1629      | 4864.88232   | 497.61331    | 93.5144 |
| 2      | 7.603         | MM   | 0.1569      | 337.40033    | 35.83559     | 6.4856  |

Totals : 5202.28265 533.44890

## 4.2 $^1\text{H}$ and $^{13}\text{C}$ -NMR spectra and HPLC traces of compound 4b

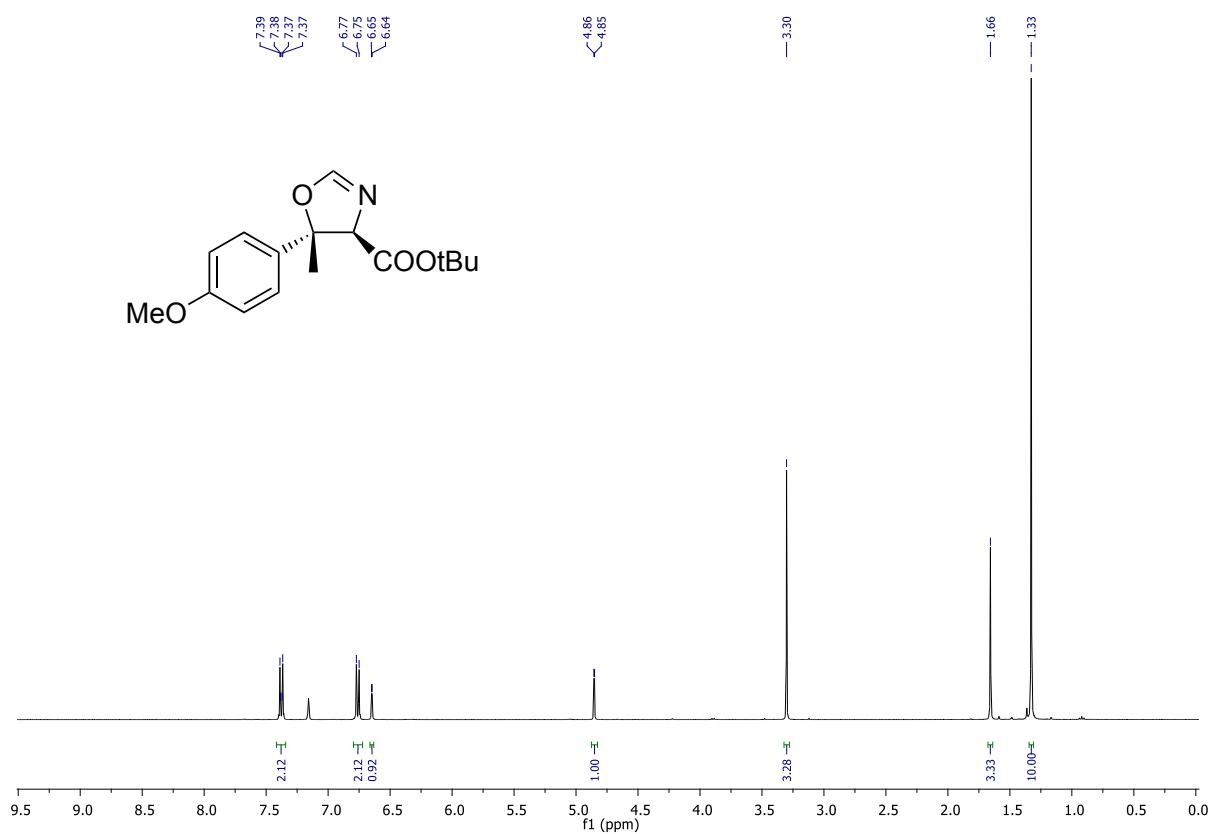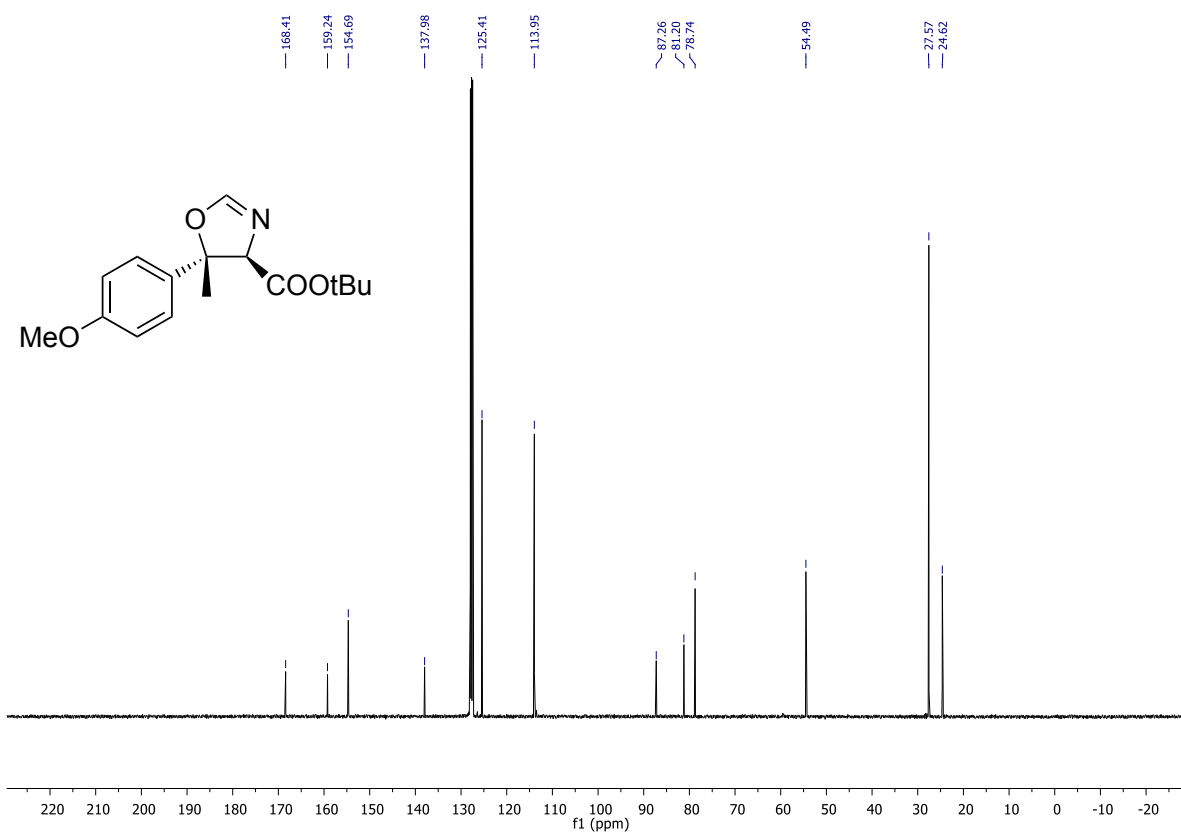

HPLC traces of racemic compound

Current Chromatogram(s)

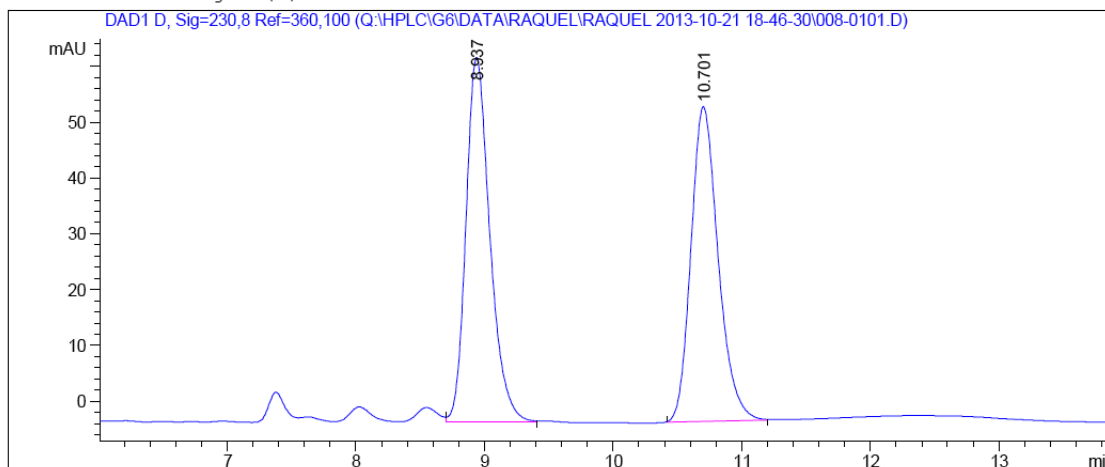

| Peak # | RetTime [min] | Type | Width [min] | Area [mAU*s] | Height [mAU] | Area %  |
|--------|---------------|------|-------------|--------------|--------------|---------|
| 1      | 8.937         | VB   | 0.1968      | 843.94507    | 65.30347     | 50.4431 |
| 2      | 10.701        | BB   | 0.2256      | 829.11786    | 56.35551     | 49.5569 |

HPLC traces of 4b

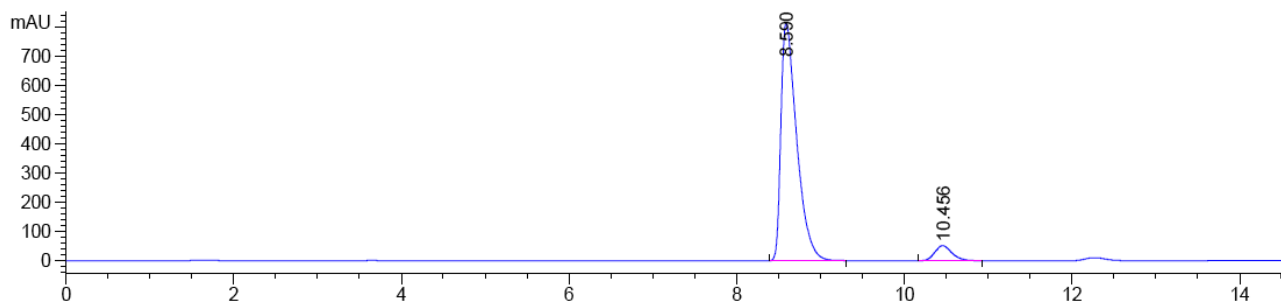

| Peak # | RetTime [min] | Type | Width [min] | Area [mAU*s] | Height [mAU] | Area %  |
|--------|---------------|------|-------------|--------------|--------------|---------|
| 1      | 8.590         | BB   | 0.1997      | 1.06922e4    | 811.62561    | 93.5169 |
| 2      | 10.456        | BB   | 0.2199      | 741.23425    | 51.50051     | 6.4831  |



### 4.3 $^1\text{H}$ and $^{13}\text{C}$ -NMR spectra and HPLC traces of compound 4c

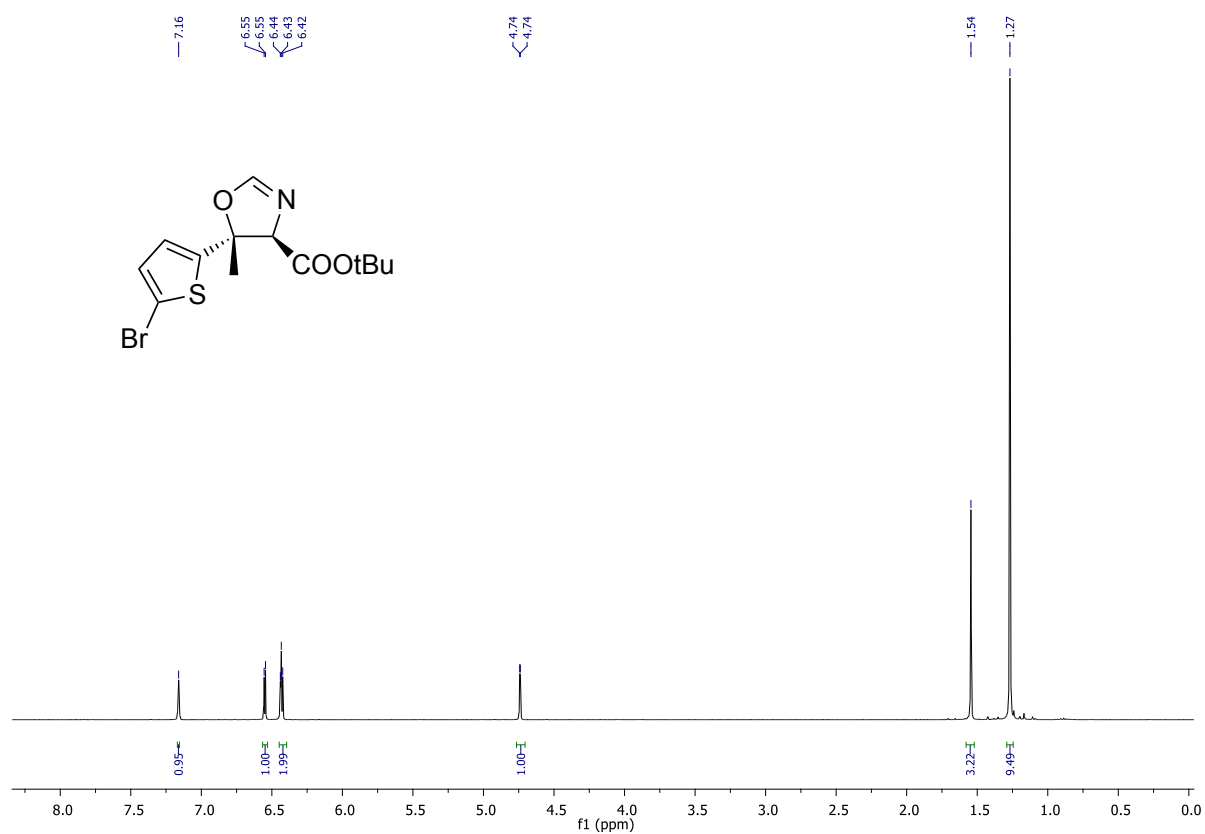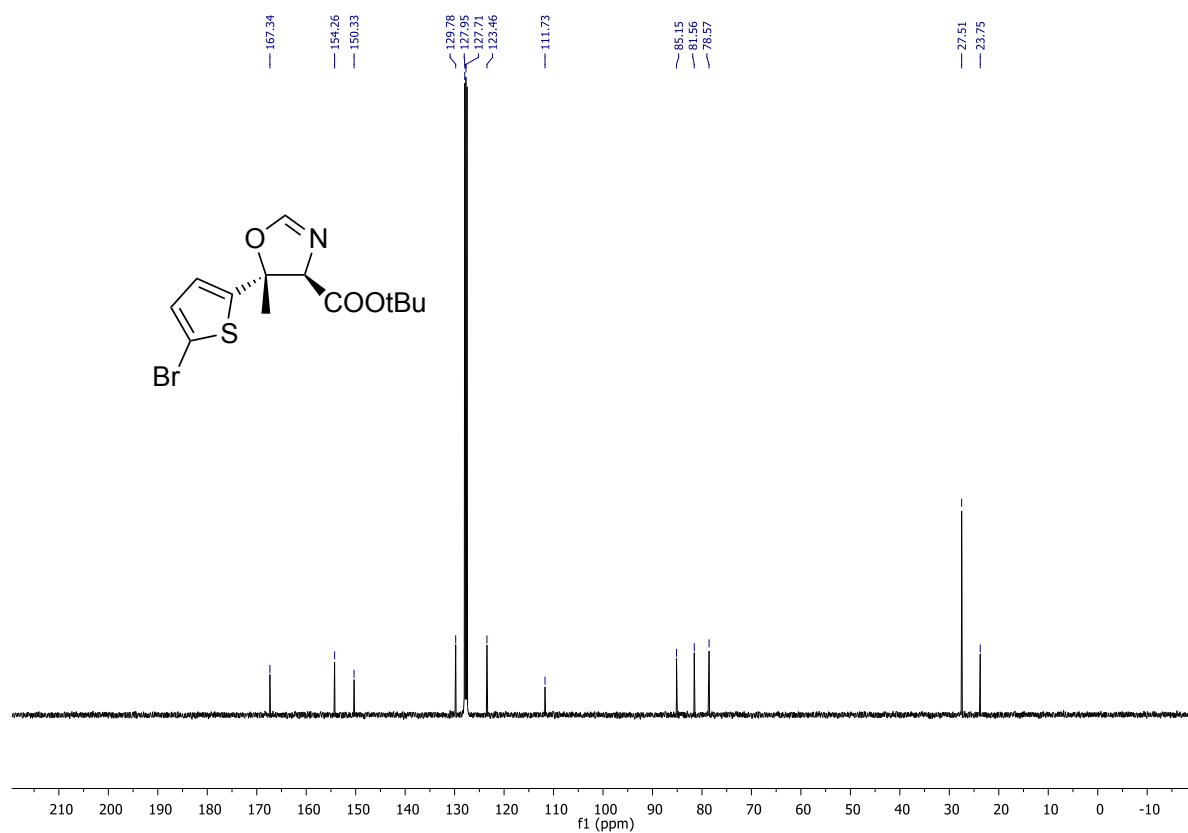

HPLC traces of racemic compound

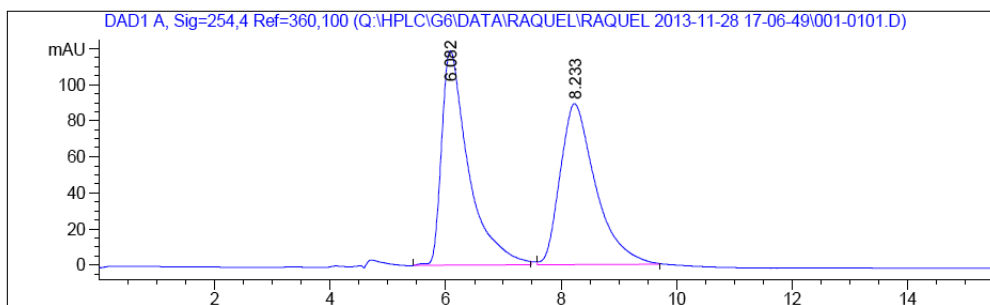

Signal 4: DAD1 D, Sig=230,16 Ref=360,100

| Peak # | RetTime [min] | Type | Width [min] | Area [mAU*s] | Height [mAU] | Area %  |
|--------|---------------|------|-------------|--------------|--------------|---------|
| 1      | 6.197         | VB   | 0.3424      | 3995.90552   | 168.66512    | 49.4806 |
| 2      | 8.418         | BB   | 0.4214      | 4079.79028   | 142.75082    | 50.5194 |

HPLC traces of 4c

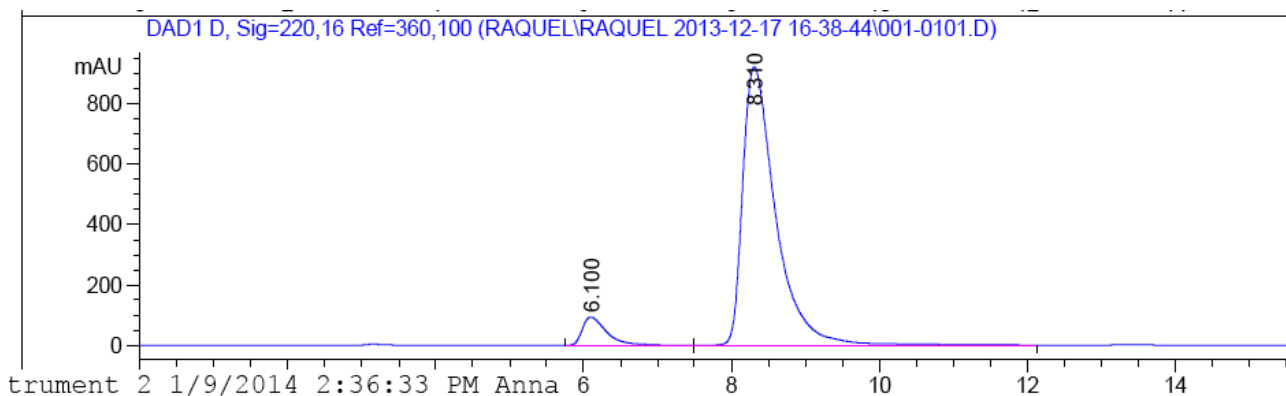

| Peak # | RetTime [min] | Type | Width [min] | Area [mAU*s] | Height [mAU] | Area %  |
|--------|---------------|------|-------------|--------------|--------------|---------|
| 1      | 6.100         | VV   | 0.3556      | 2183.53760   | 93.80459     | 7.0644  |
| 2      | 8.310         | VB   | 0.4724      | 2.87256e4    | 919.58276    | 92.9356 |

Totals : 3.09091e4 1013.38735

#### 4.4 $^1\text{H}$ and $^{13}\text{C}$ -NMR spectra and HPLC traces of compound 4d

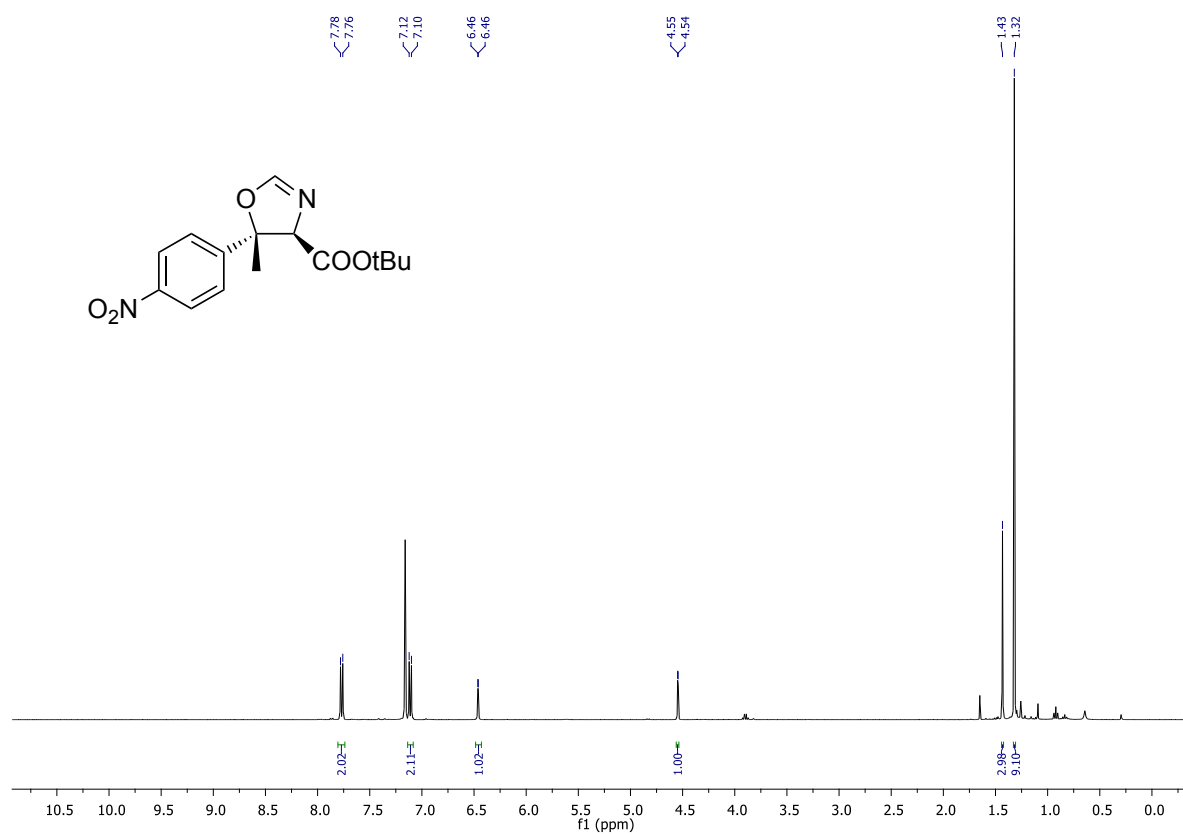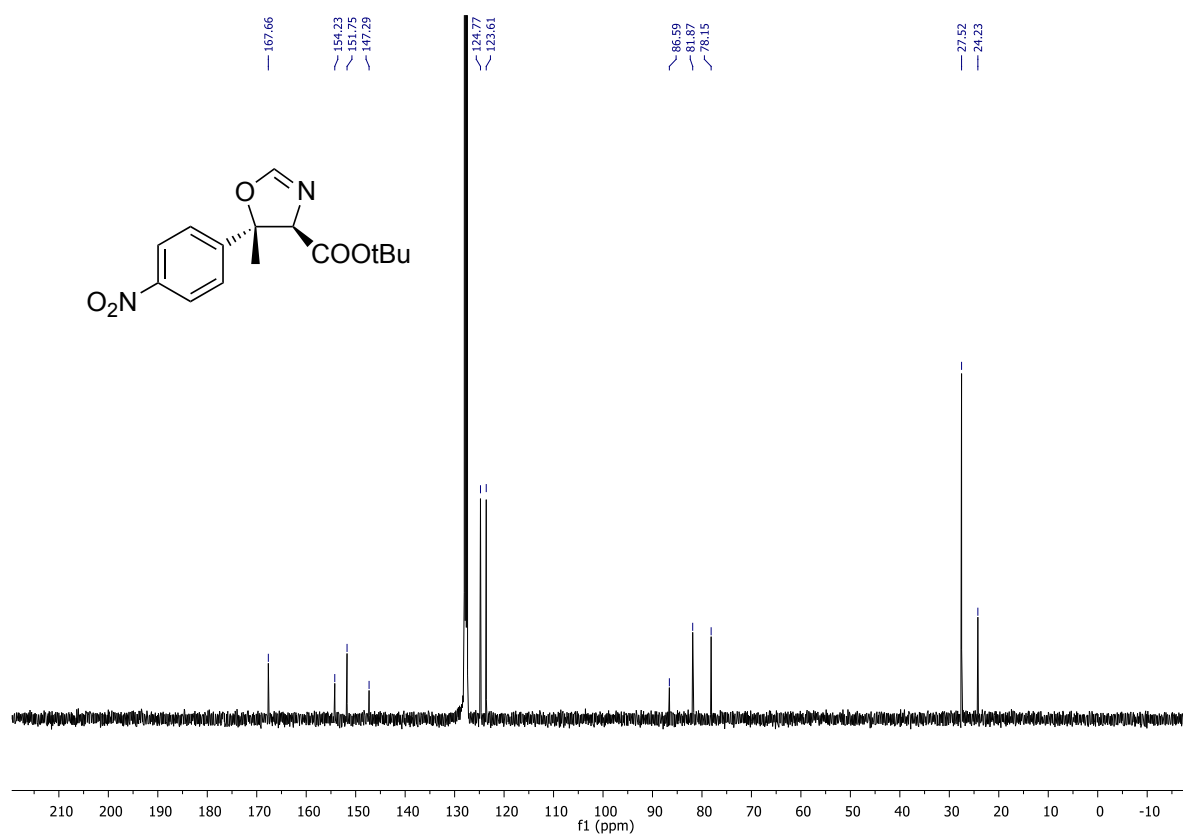

HPLC traces of racemic compound

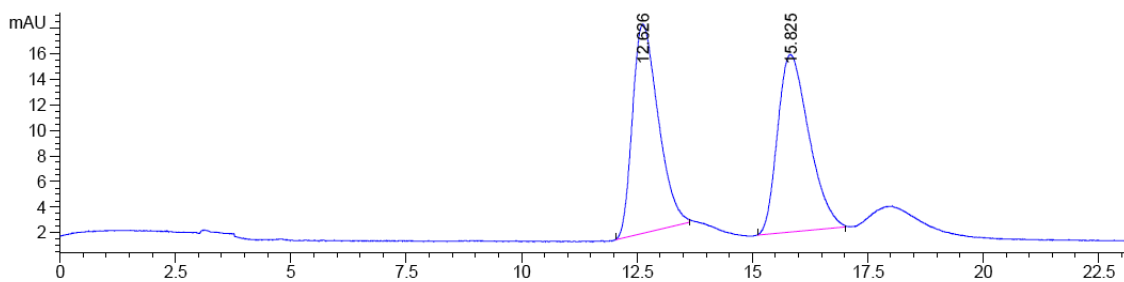

| Peak # | RetTime [min] | Type | Width [min] | Area [mAU*s] | Height [mAU] | Area %  |
|--------|---------------|------|-------------|--------------|--------------|---------|
| 1      | 12.626        | BB   | 0.5037      | 693.29431    | 17.94449     | 49.2240 |
| 2      | 15.825        | BB   | 0.5656      | 715.15344    | 15.20797     | 50.7760 |

HPLC traces of 4d

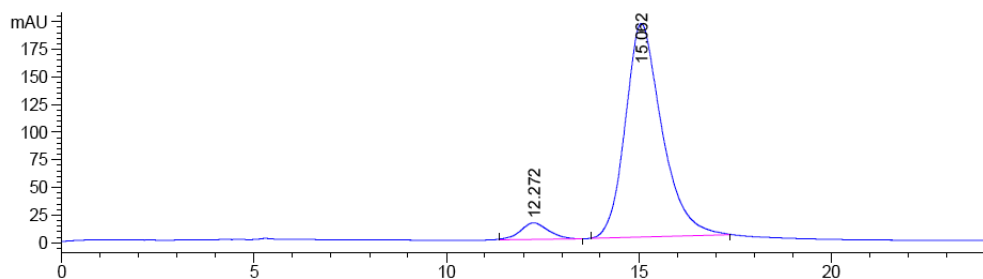

Signal 3: DAD1 C, Sig=210,8 Ref=360,100

| Peak # | RetTime [min] | Type | Width [min] | Area [mAU*s] | Height [mAU] | Area %  |
|--------|---------------|------|-------------|--------------|--------------|---------|
| 1      | 12.276        | BB   | 0.6423      | 622.91516    | 12.74217     | 5.3785  |
| 2      | 15.062        | BB   | 0.9564      | 1.09587e4    | 166.38773    | 94.6215 |

# 4.5 $^1\text{H}$ and $^{13}\text{C}$ -NMR spectra and HPLC traces of compound 4e

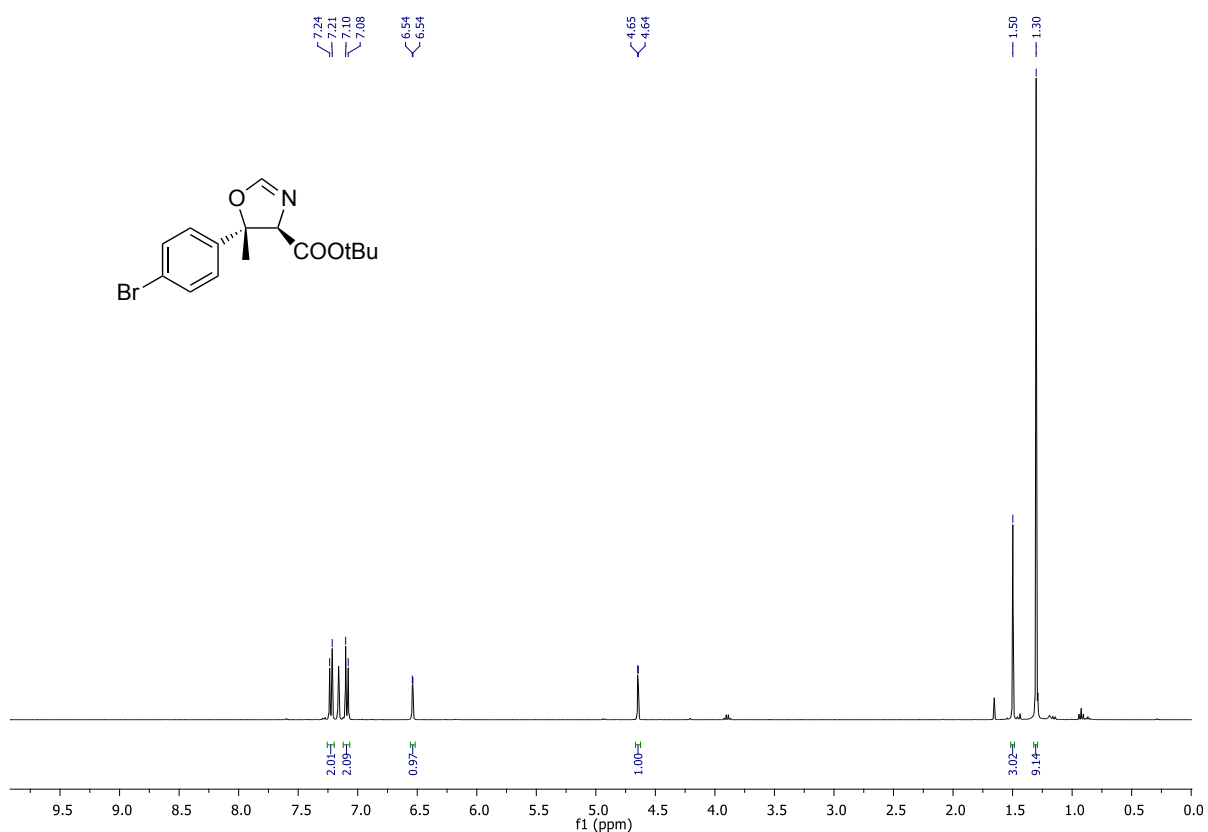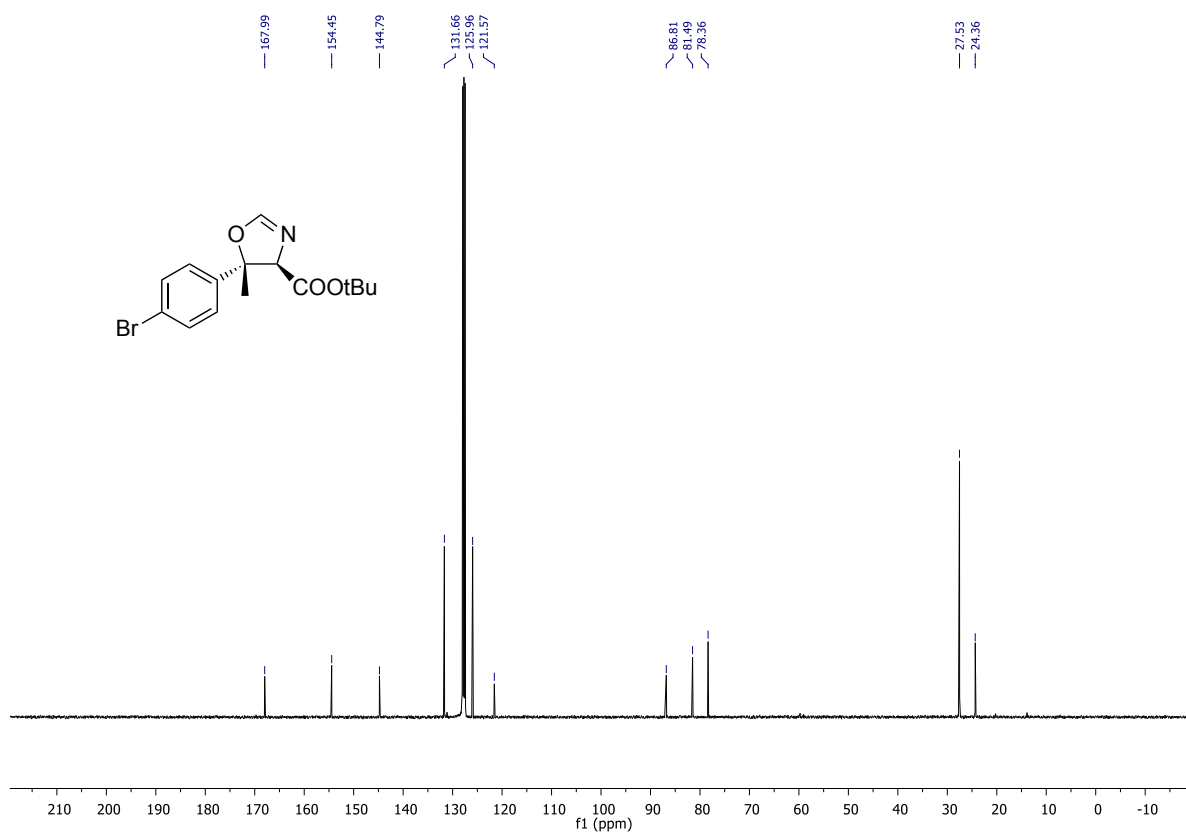

HPLC traces of racemic compound

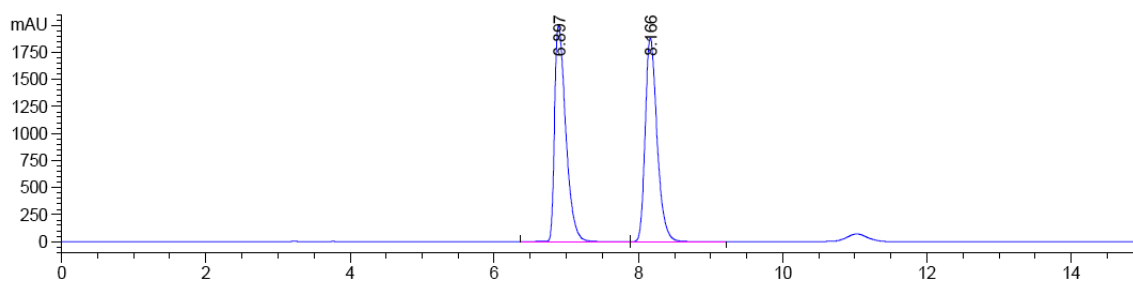

| Peak # | RetTime [min] | Type | Width [min] | Area [mAU*s] | Height [mAU] | Area %  |
|--------|---------------|------|-------------|--------------|--------------|---------|
| 1      | 6.897         | VV   | 0.1667      | 2.16165e4    | 1990.69995   | 50.0425 |
| 2      | 8.166         | VB   | 0.1778      | 2.15798e4    | 1881.61841   | 49.9575 |

HPLC traces of 4e

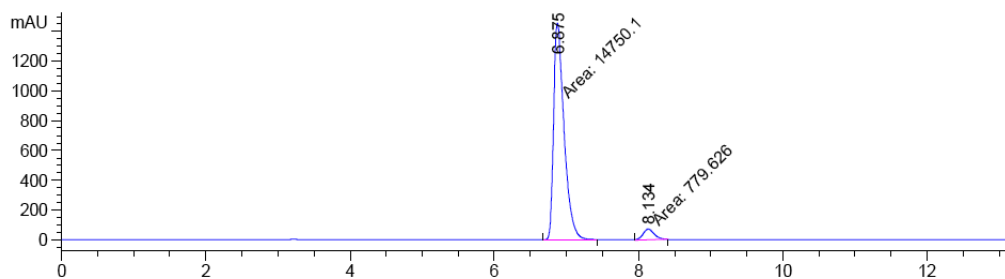

| Peak # | RetTime [min] | Type | Width [min] | Area [mAU*s] | Height [mAU] | Area %  |
|--------|---------------|------|-------------|--------------|--------------|---------|
| 1      | 6.875         | MM   | 0.1684      | 1.47501e4    | 1460.06018   | 94.9798 |
| 2      | 8.134         | MM   | 0.1791      | 779.62573    | 72.53478     | 5.0202  |

## 4.6 $^1\text{H}$ and $^{13}\text{C}$ -NMR spectra and HPLC traces of compound 4f

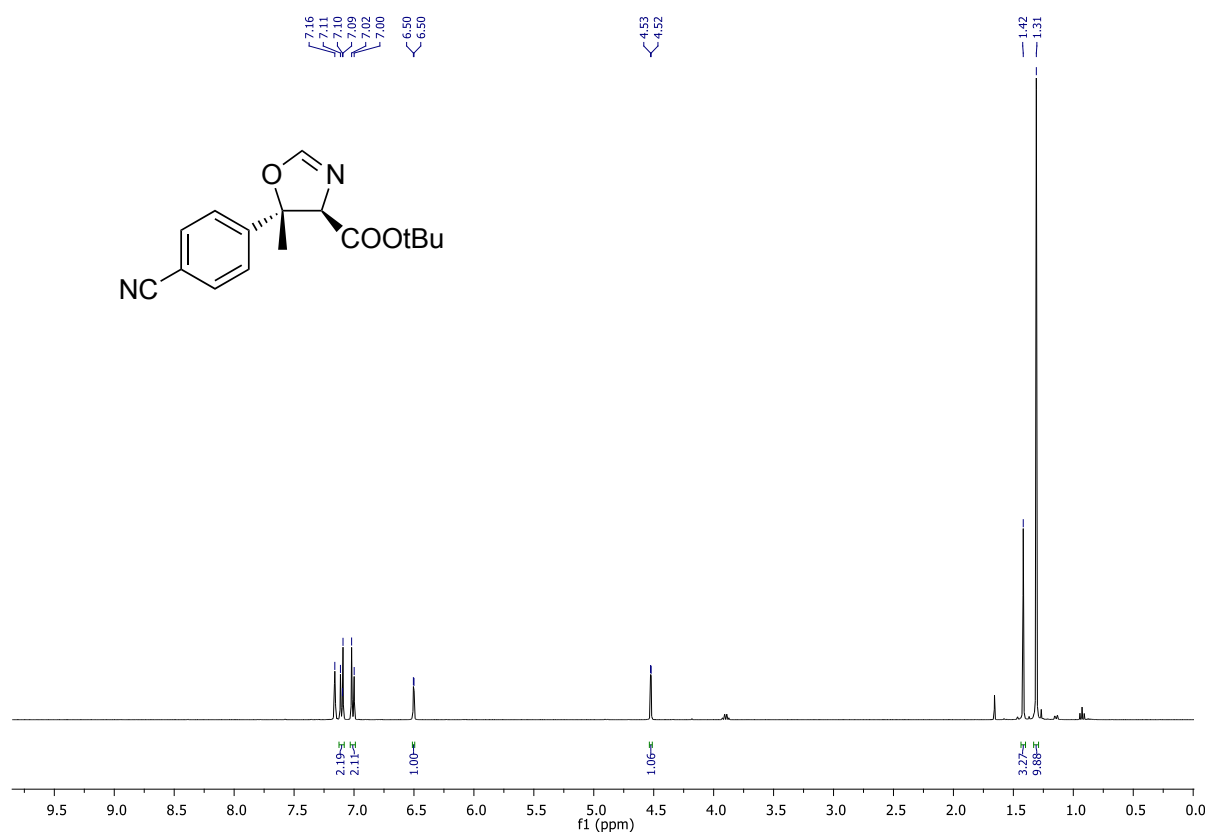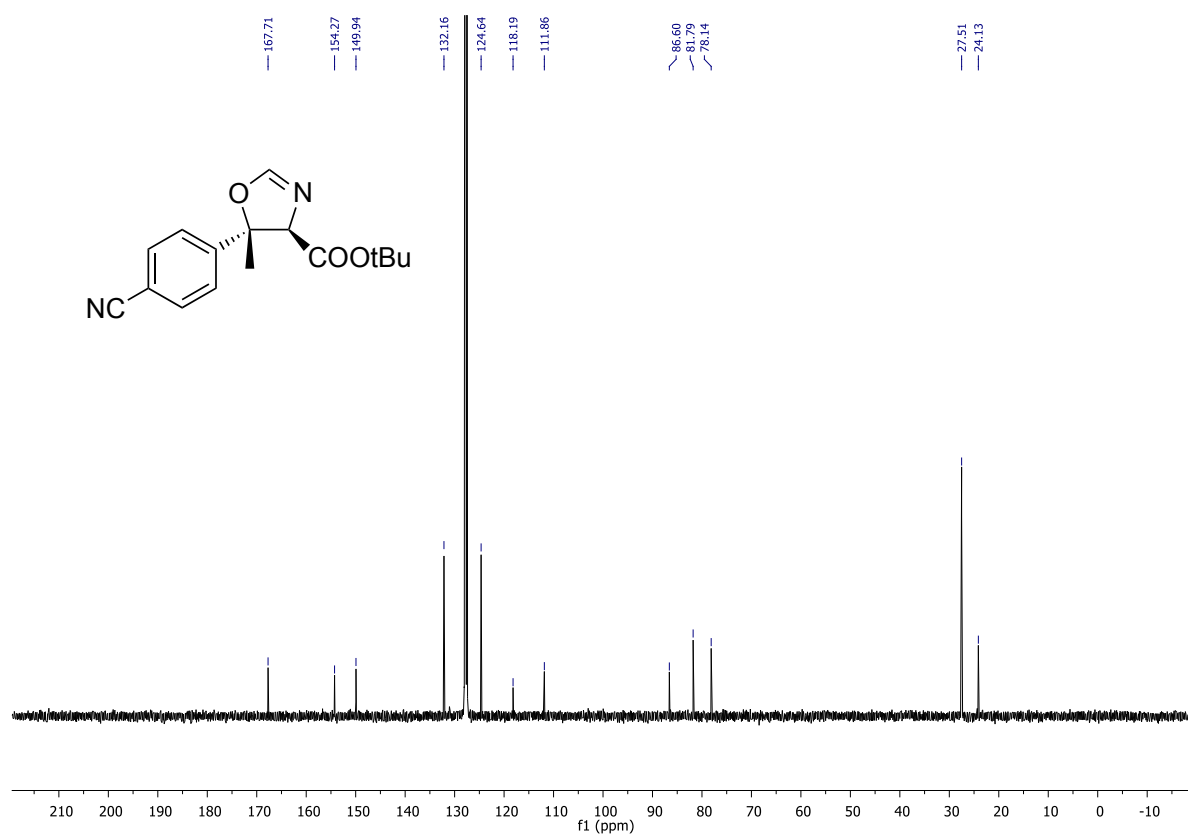

HPLC traces of racemic compound

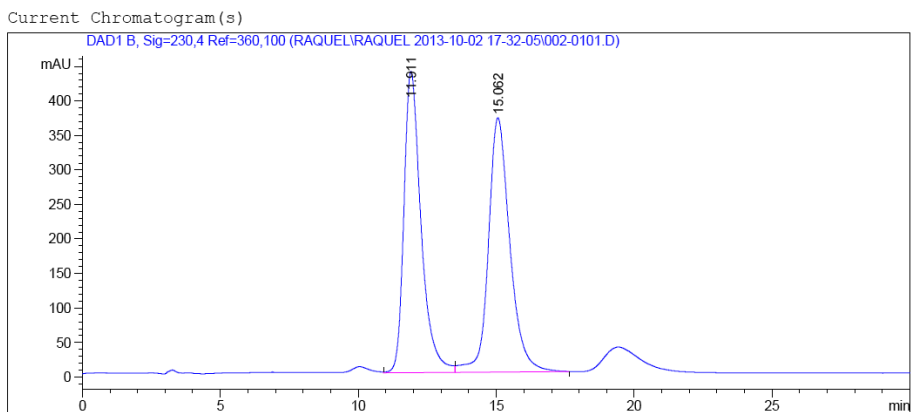

Signal 2: DAD1 B, Sig=230,4 Ref=360,100

| Peak # | RetTime [min] | Type | Width [min] | Area [mAU*s] | Height [mAU] | Area %  |
|--------|---------------|------|-------------|--------------|--------------|---------|
| 1      | 11.911        | VB   | 0.6518      | 1.88464e4    | 436.43103    | 48.5579 |
| 2      | 15.062        | BB   | 0.8082      | 1.99659e4    | 368.47104    | 51.4421 |

Totals :                                    3.88123e4    804.90207

HPLC traces of 4f

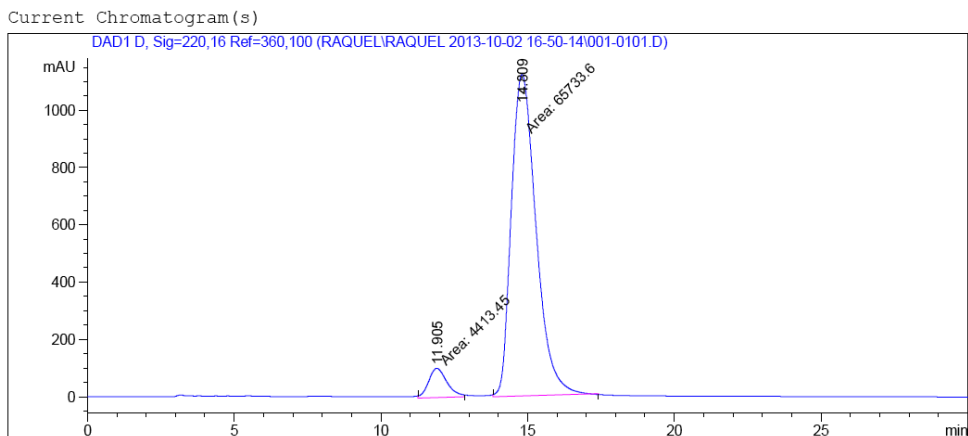

Signal 1: DAD1 A, Sig=254,4 Ref=off

| Peak # | RetTime [min] | Type | Width [min] | Area [mAU*s] | Height [mAU] | Area %  |
|--------|---------------|------|-------------|--------------|--------------|---------|
| 1      | 11.908        | BB   | 0.4533      | 103.90916    | 2.71035      | 4.4185  |
| 2      | 14.837        | BB   | 0.8107      | 2247.79614   | 34.98069     | 95.5815 |

Totals :                                    2351.70530    37.69103



## 4.7 $^1\text{H}$ and $^{13}\text{C}$ -NMR spectra and HPLC traces of compound 4g

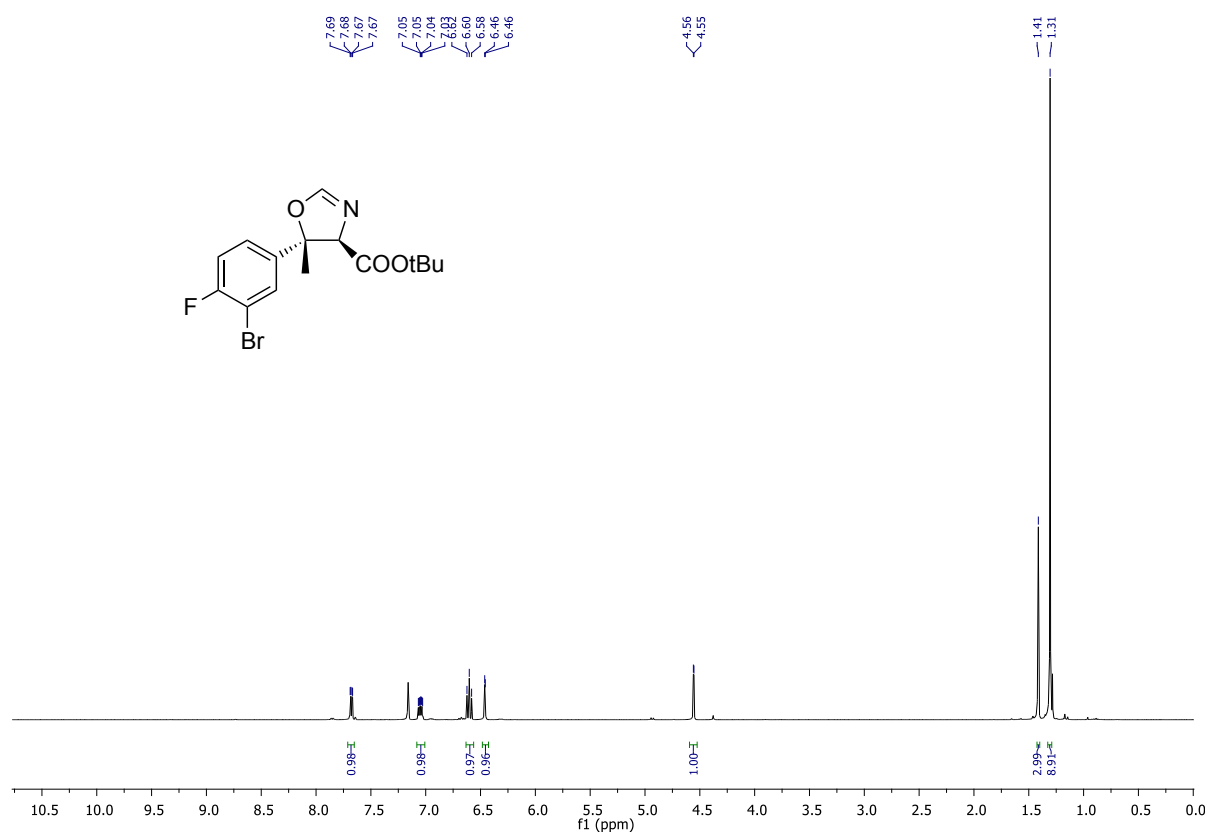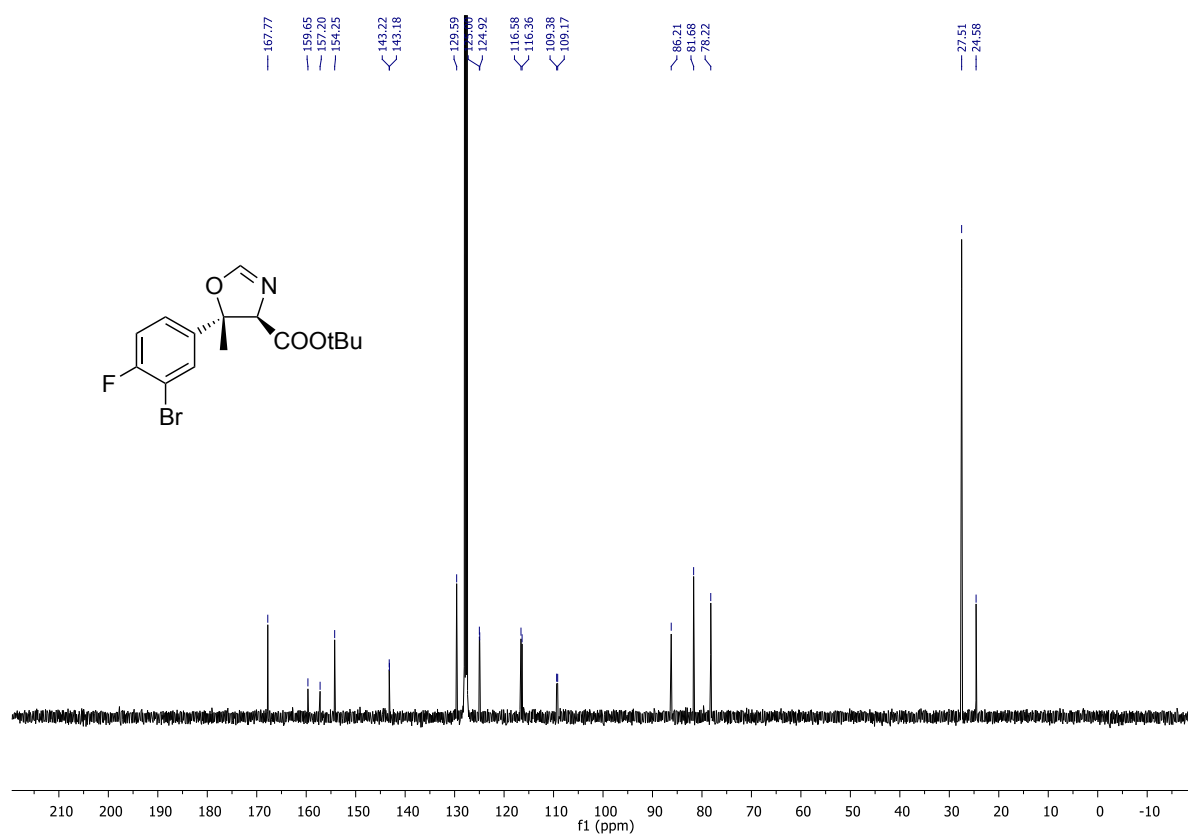

HPLC traces of racemic compound

HPLC traces of racemic compound

Current Chromatogram(s)

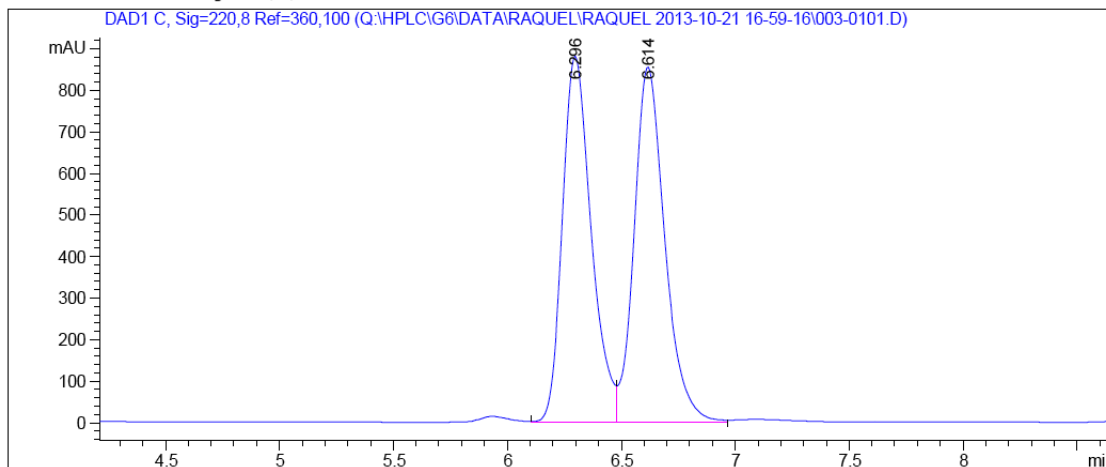

Signal 3: DAD1 C, Sig=220,8 Ref=360,100

| Peak # | RetTime [min] | Type | Width [min] | Area [mAU*s] | Height [mAU] | Area %  |
|--------|---------------|------|-------------|--------------|--------------|---------|
| 1      | 6.296         | VV   | 0.1347      | 7754.74414   | 881.13116    | 49.2245 |
| 2      | 6.614         | VV   | 0.1411      | 7999.07861   | 855.15680    | 50.7755 |

Totals : 1.57538e4 1736.28796

HPLC traces of 4g

Current Chromatogram(s)

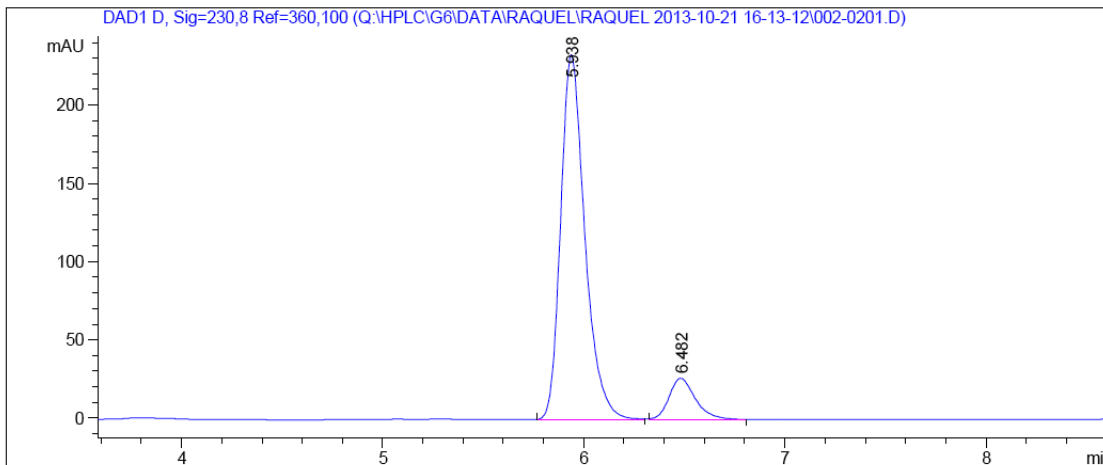

Signal 4: DAD1 D, Sig=230,8 Ref=360,100

| Peak # | RetTime [min] | Type | Width [min] | Area [mAU*s] | Height [mAU] | Area %  |
|--------|---------------|------|-------------|--------------|--------------|---------|
| 1      | 5.938         | BB   | 0.1273      | 1945.37500   | 233.21146    | 89.0379 |
| 2      | 6.482         | BB   | 0.1378      | 239.50926    | 26.40556     | 10.9621 |

## 4.8 $^1\text{H}$ and $^{13}\text{C}$ -NMR spectra and HPLC traces of compound 4h

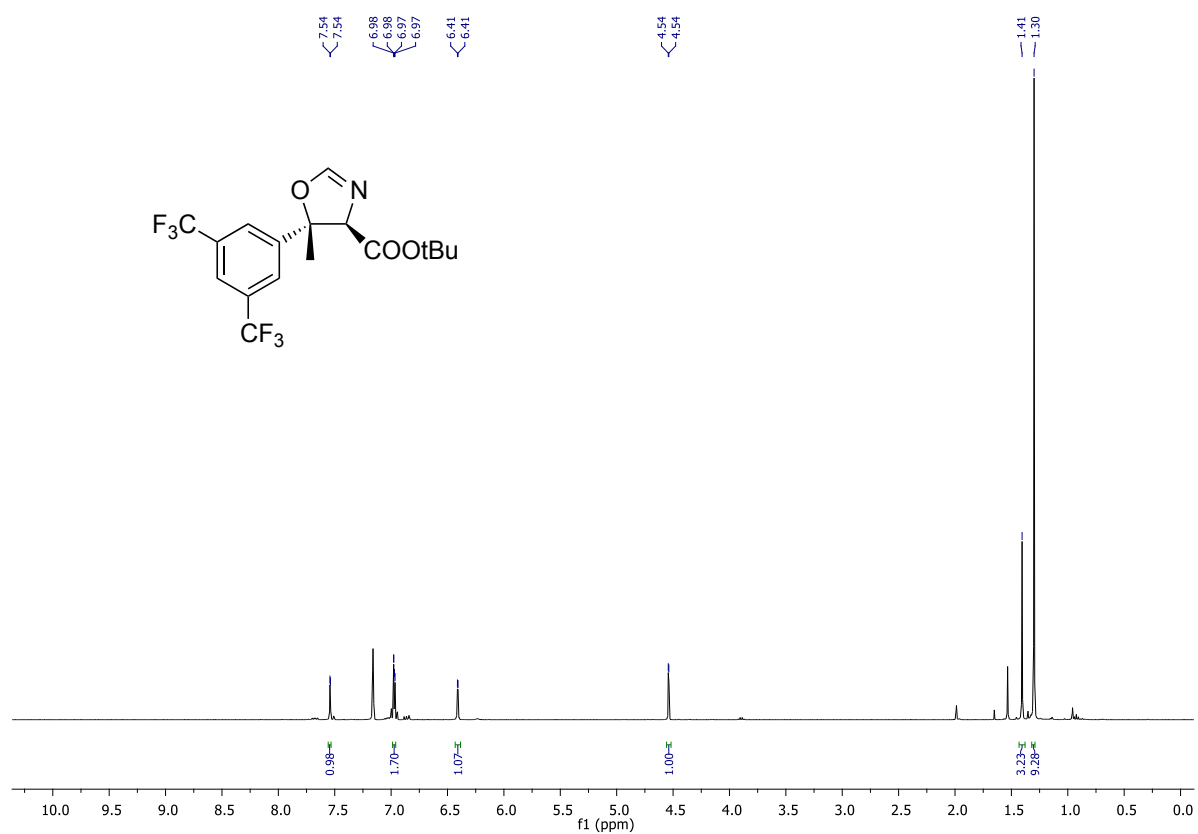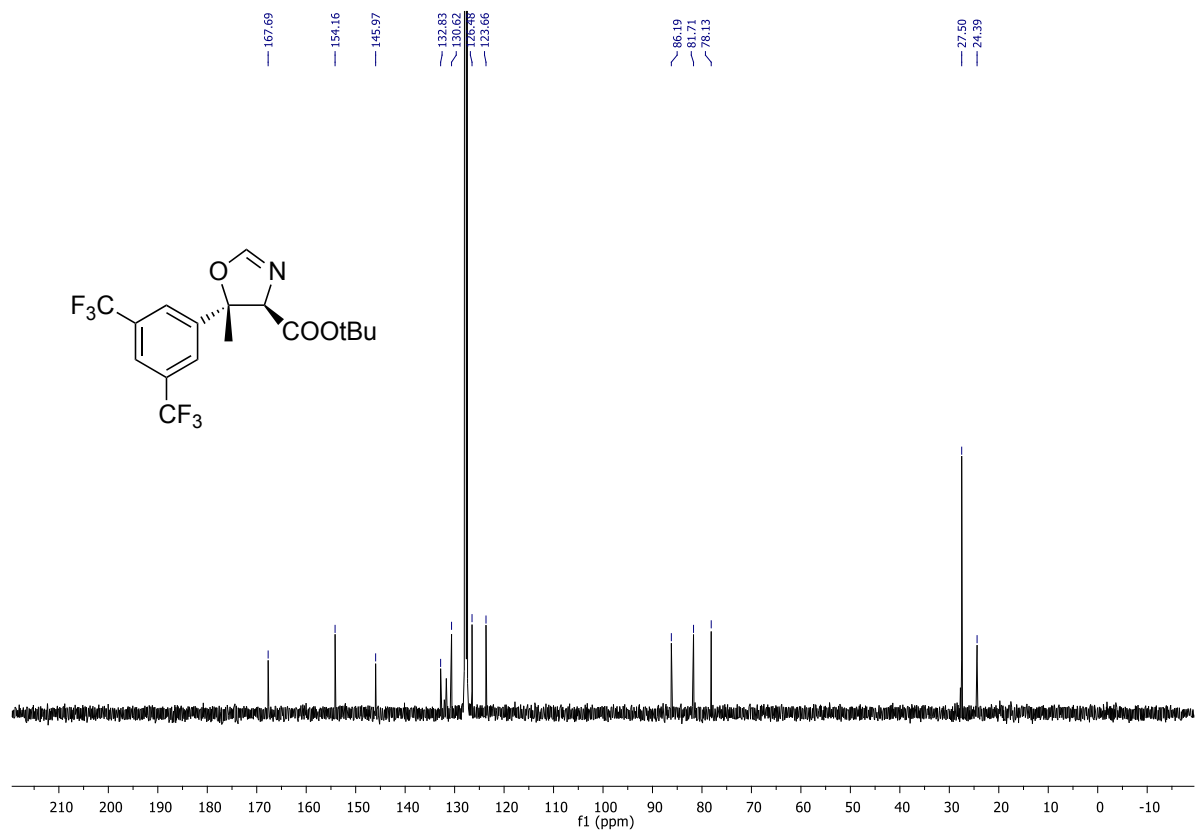

HPLC traces of racemic compound

Current Chromatogram(s)

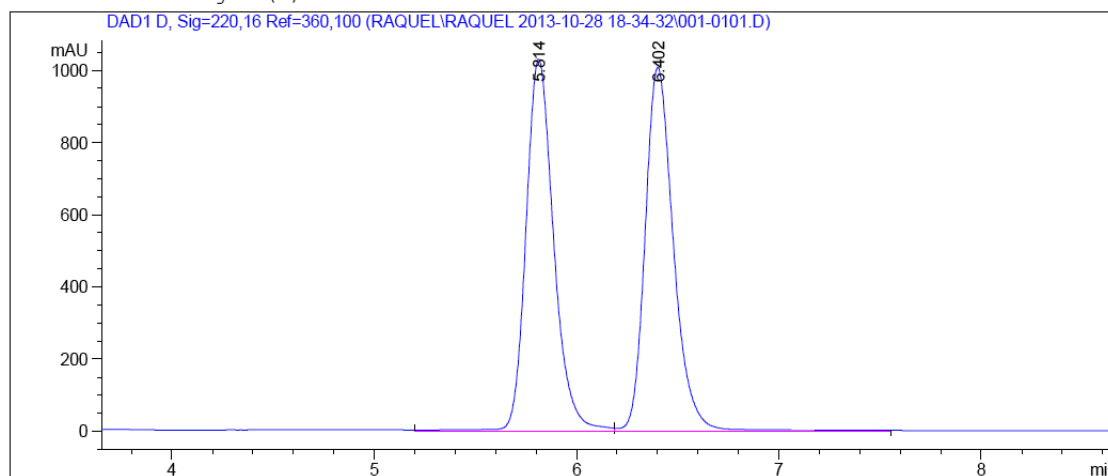

| Peak # | RetTime [min] | Type | Width [min] | Area [mAU*s] | Height [mAU] | Area %  |
|--------|---------------|------|-------------|--------------|--------------|---------|
| 1      | 5.814         | VV   | 0.1510      | 9761.08789   | 1025.51343   | 49.9528 |
| 2      | 6.402         | VB   | 0.1537      | 9779.53516   | 1003.34247   | 50.0472 |

Totals : 1.95406e4 2028.85590

HPLC traces of 4h

Current Chromatogram(s)

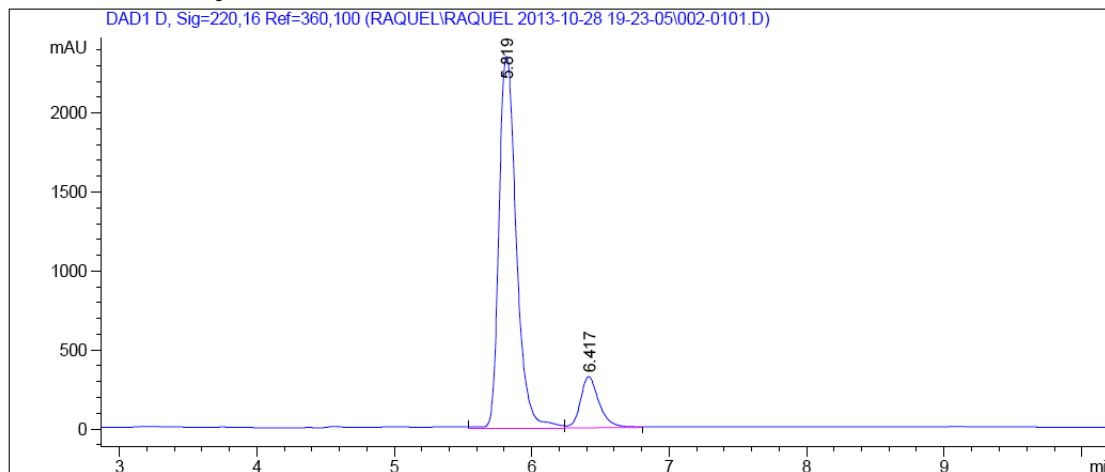

| Peak # | RetTime [min] | Type | Width [min] | Area [mAU*s] | Height [mAU] | Area %  |
|--------|---------------|------|-------------|--------------|--------------|---------|
| 1      | 5.817         | BB   | 0.1214      | 256.38623    | 32.01791     | 87.9653 |
| 2      | 6.414         | BB   | 0.1364      | 35.07665     | 3.88100      | 12.0347 |

Totals : 291.46288 35.89891

## 4.9 $^1\text{H}$ and $^{13}\text{C}$ -NMR spectra and HPLC traces of compound 4i

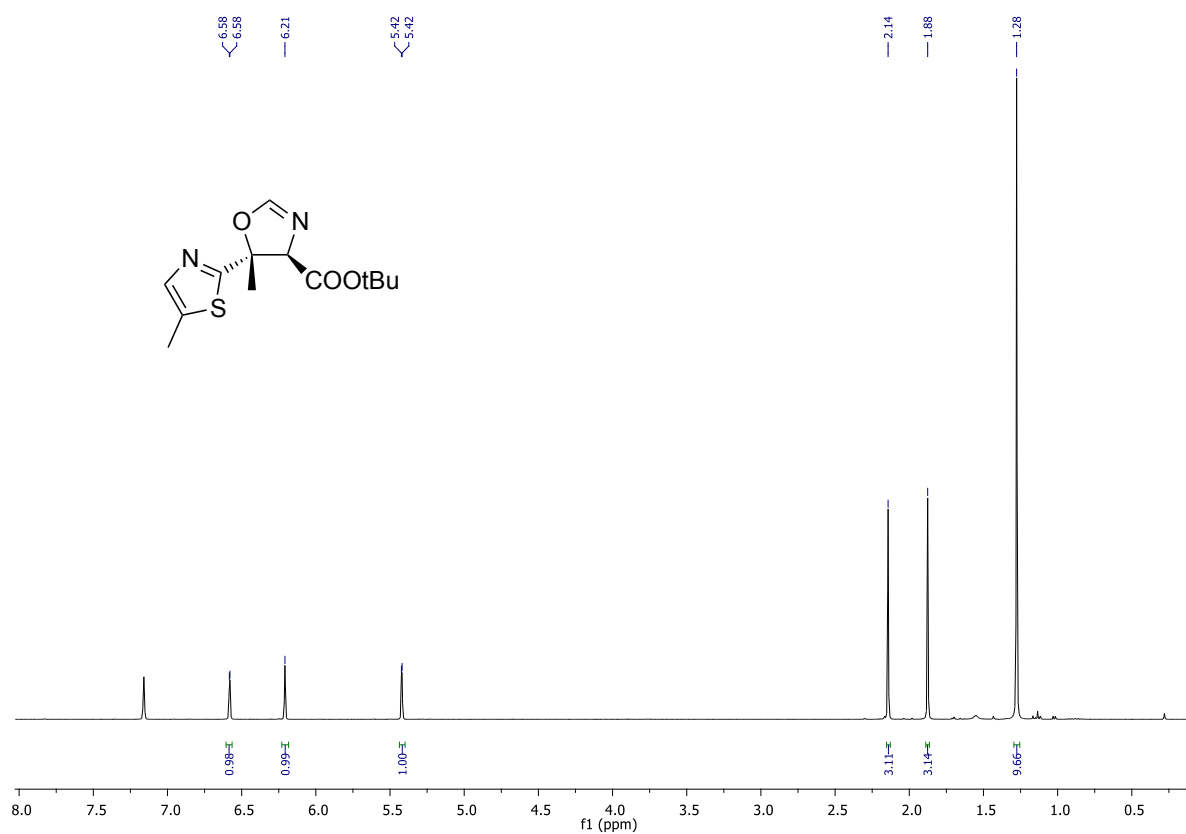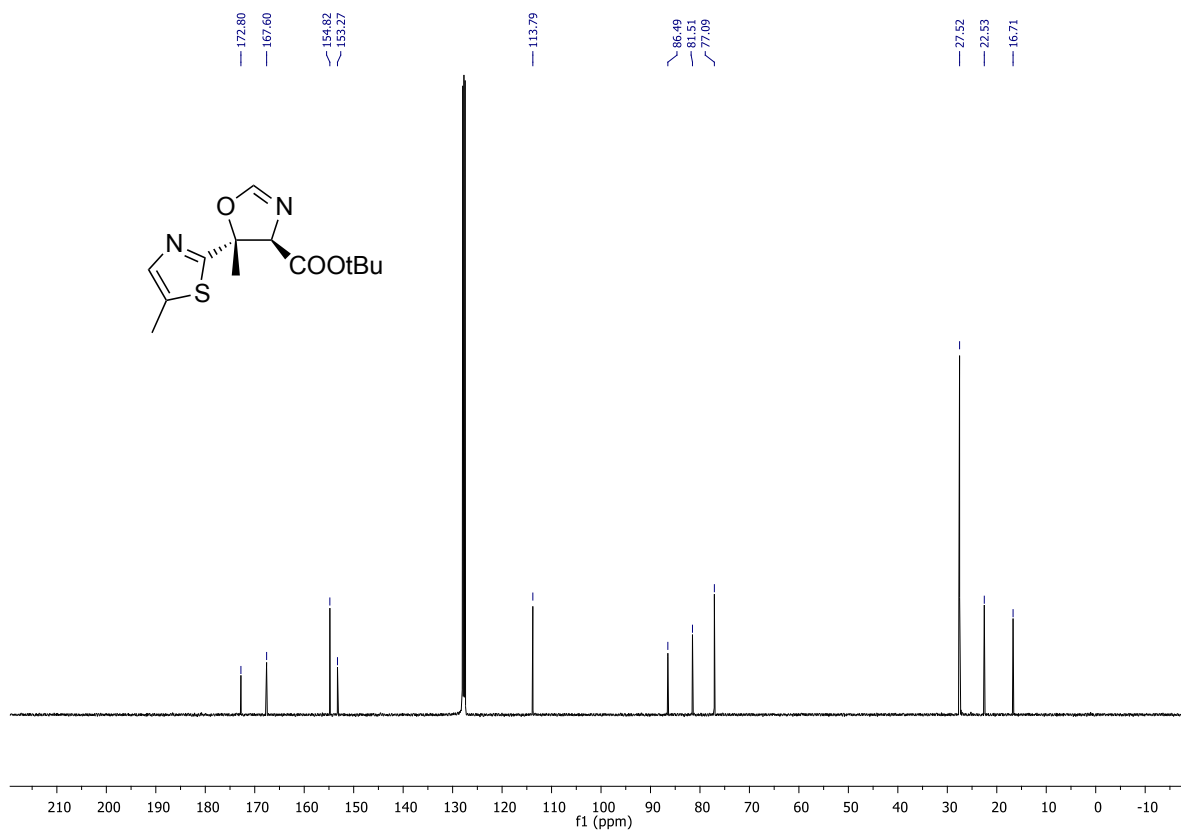

HPLC traces of racemic compound

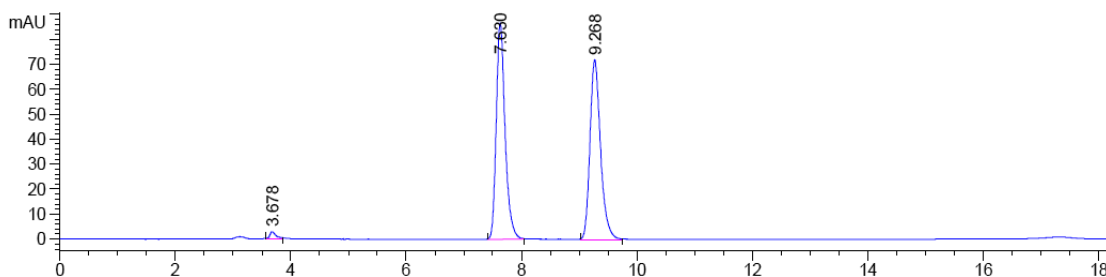

| Peak # | RetTime [min] | Type | Width [min] | Area [mAU*s] | Height [mAU] | Area %  |
|--------|---------------|------|-------------|--------------|--------------|---------|
| 1      | 7.630         | BB   | 0.1623      | 1141.33044   | 107.12650    | 50.2818 |
| 2      | 9.268         | BB   | 0.1930      | 1128.53552   | 88.98963     | 49.7182 |

HPLC traces of 4i

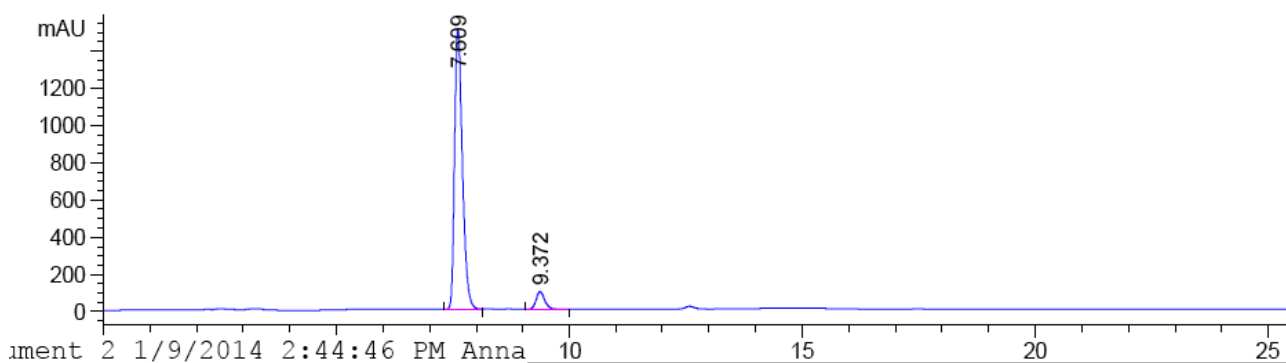

| Peak # | RetTime [min] | Type | Width [min] | Area [mAU*s] | Height [mAU] | Area %  |
|--------|---------------|------|-------------|--------------|--------------|---------|
| 1      | 7.609         | VV   | 0.1848      | 1.76938e4    | 1509.44238   | 93.2254 |
| 2      | 9.372         | VB   | 0.2054      | 1285.78613   | 95.33325     | 6.7746  |

Totals : 1.89796e4 1604.77563

### 4.10 $^1\text{H}$ and $^{13}\text{C}$ -NMR spectra and HPLC traces of compound 4j

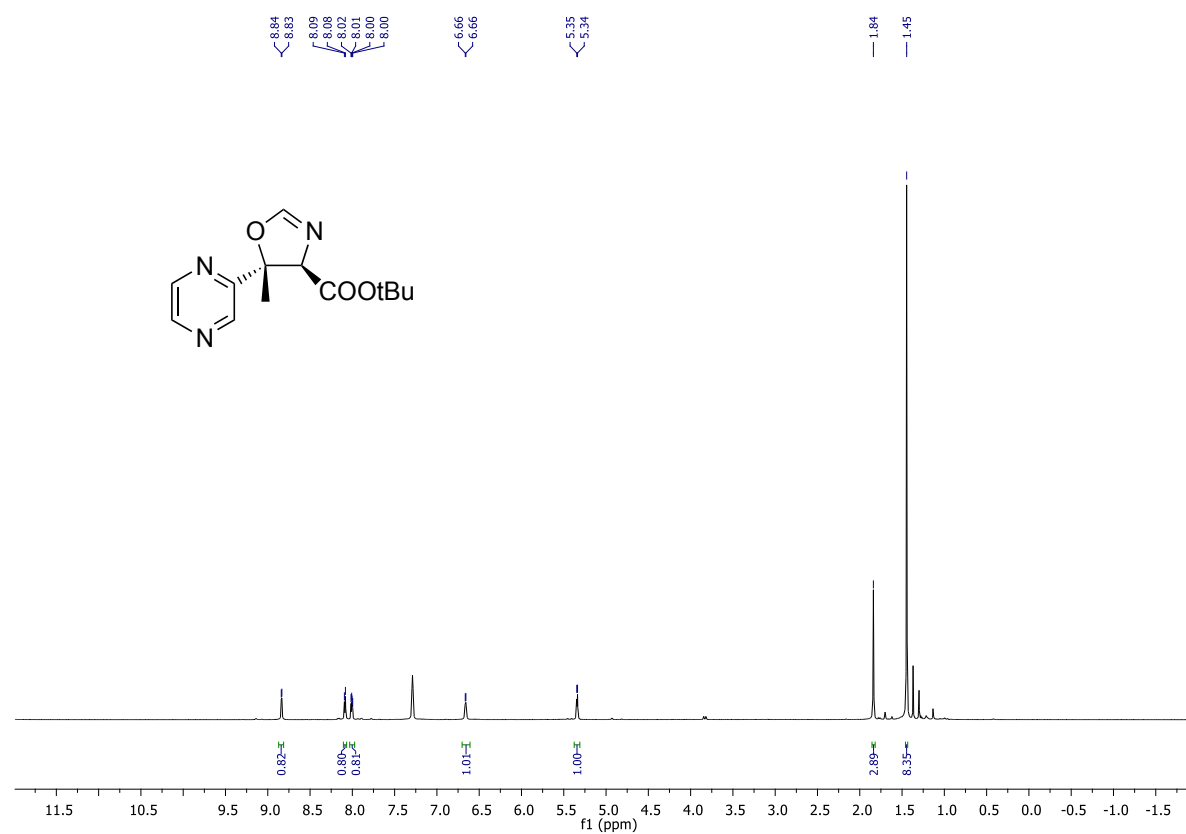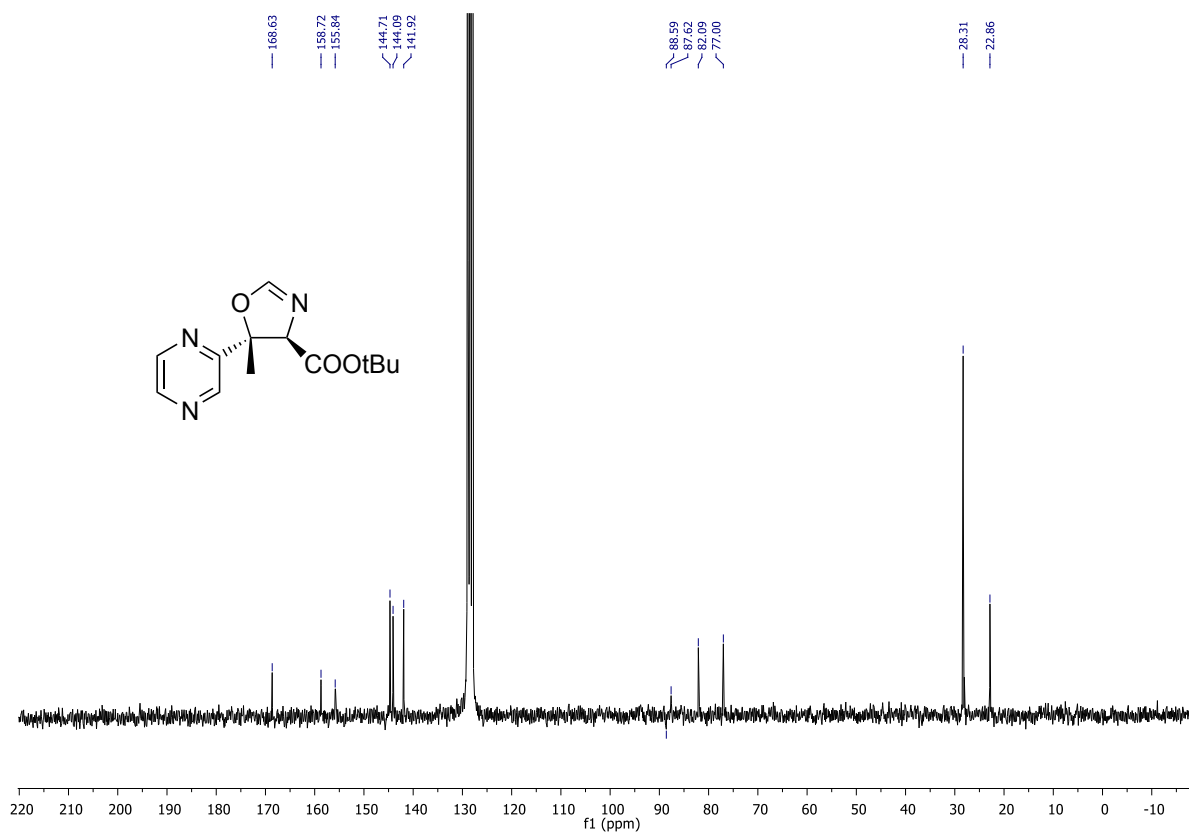

HPLC traces of racemic compound

Additional Info : Peak(s) manually integrated

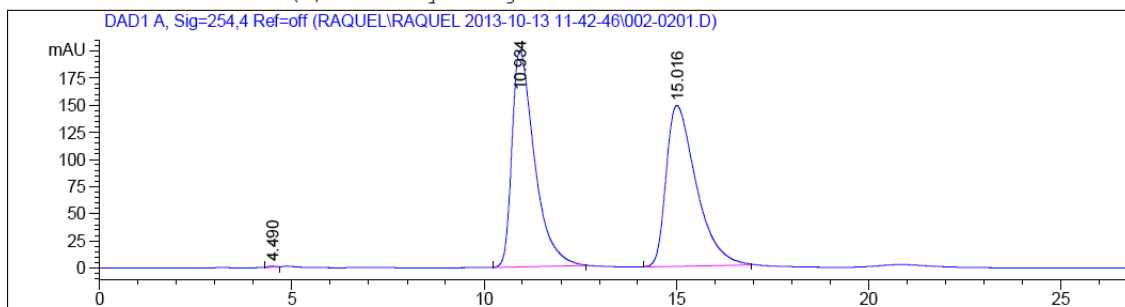

| Peak # | RetTime [min] | Type | Width [min] | Area [mAU*s] | Height [mAU] | Area %  |
|--------|---------------|------|-------------|--------------|--------------|---------|
| 1      | 10.934        | MM   | 0.6850      | 1564.26111   | 38.06161     | 49.6516 |
| 2      | 15.014        | MM   | 0.9278      | 1586.21387   | 28.49492     | 50.3484 |

Totals : 3150.47498 66.55653

HPLC traces of 4j

Additional Info : Peak(s) manually integrated

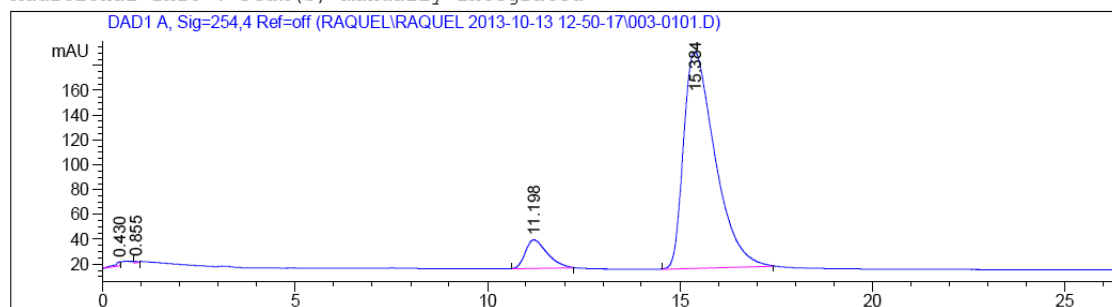

Signal 5: DAD1 E, Sig=240,4 Ref=360,100

| Peak # | RetTime [min] | Type | Width [min] | Area [mAU*s] | Height [mAU] | Area %  |
|--------|---------------|------|-------------|--------------|--------------|---------|
| 1      | 11.203        | MM   | 0.6948      | 188.61079    | 4.52434      | 8.7935  |
| 2      | 15.389        | MM   | 0.9723      | 1956.27539   | 33.53420     | 91.2065 |

Totals : 2144.88618 38.05854



## 4.11 $^1\text{H}$ and $^{13}\text{C}$ -NMR spectra and HPLC traces of compound 4k

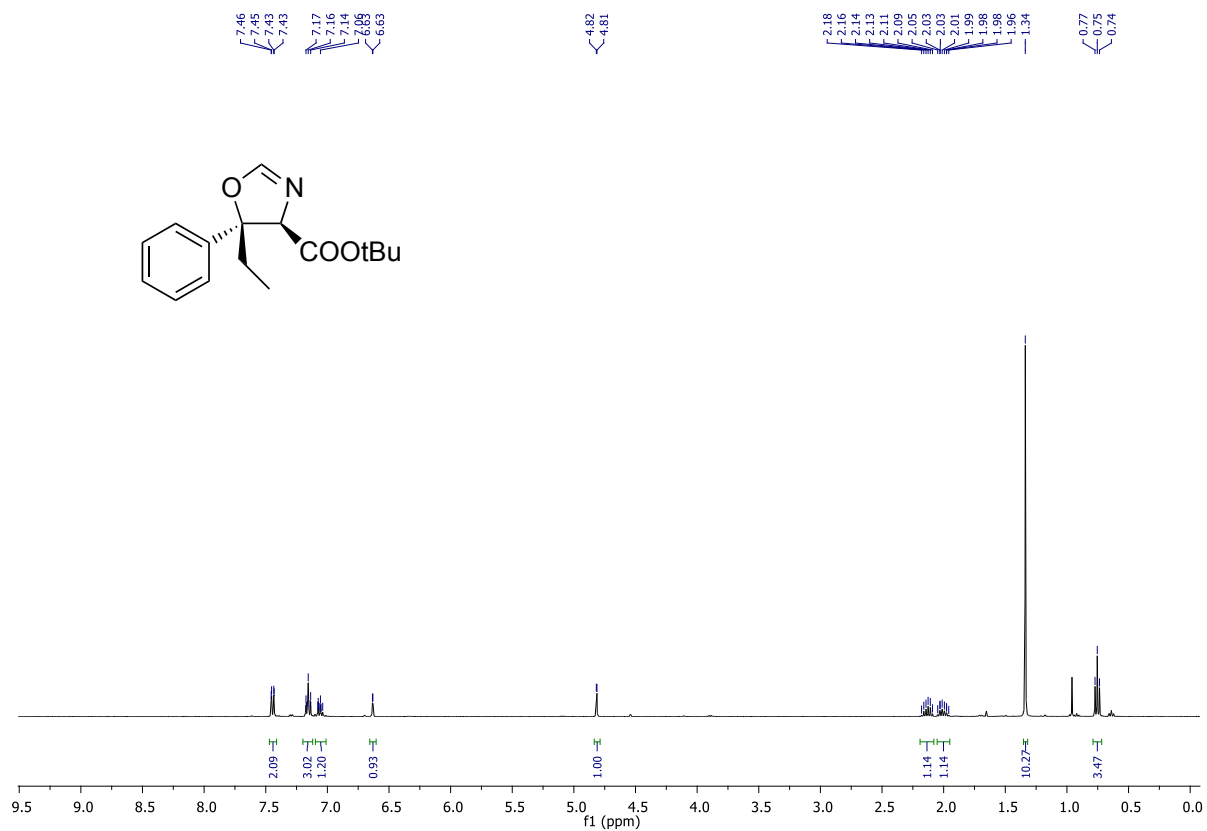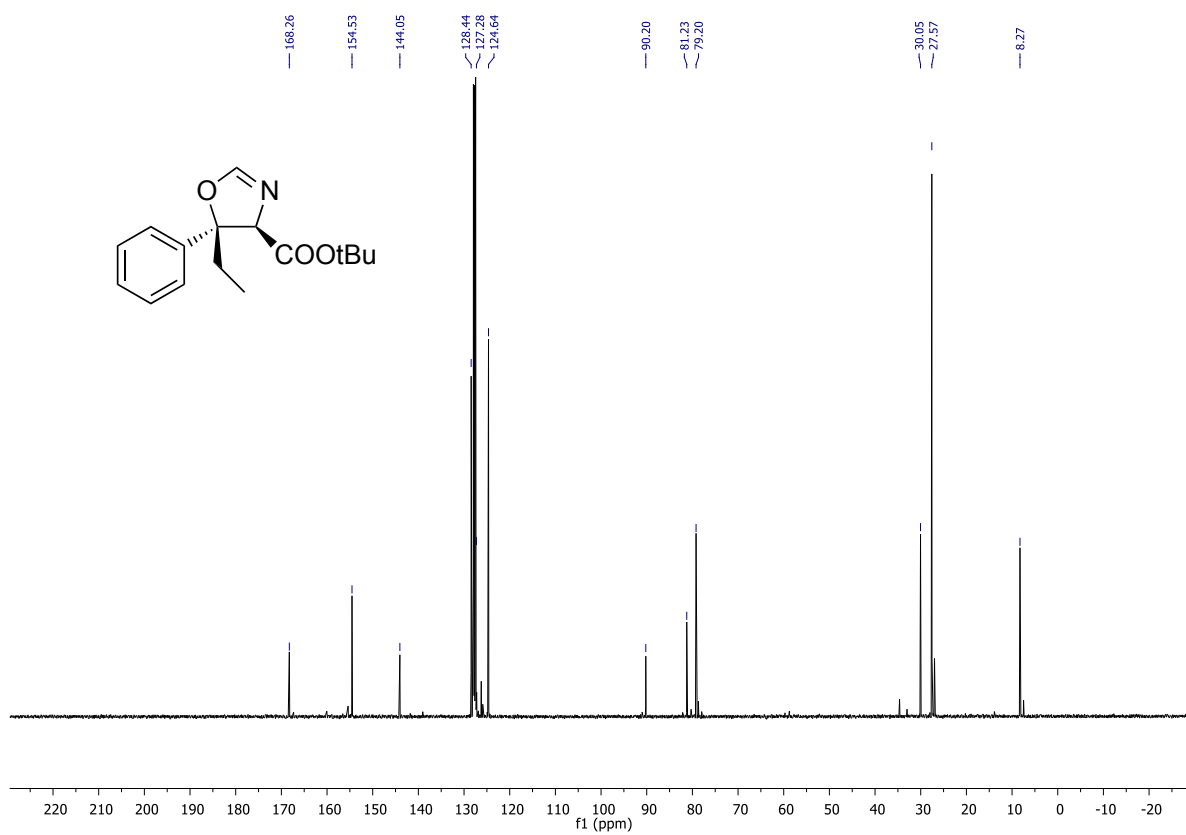

HPLC traces of racemic compound

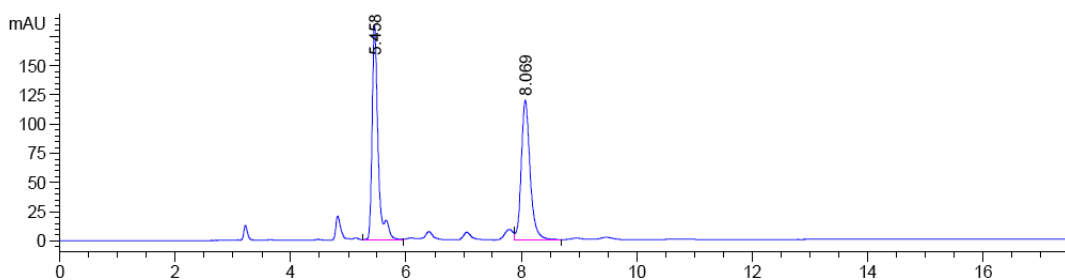

| Peak # | RetTime [min] | Type | Width [min] | Area [mAU*s] | Height [mAU] | Area %  |
|--------|---------------|------|-------------|--------------|--------------|---------|
| 1      | 5.458         | VV   | 0.1136      | 1347.77429   | 183.79715    | 51.2769 |
| 2      | 8.069         | VB   | 0.1651      | 1280.64832   | 119.47324    | 48.7231 |

HPLC traces of 4k

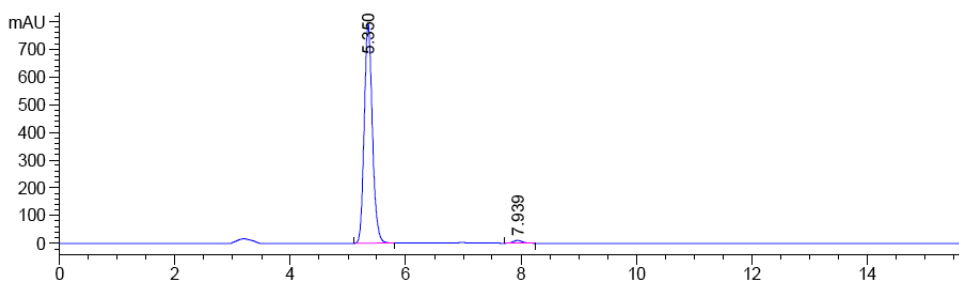

| Peak # | RetTime [min] | Type | Width [min] | Area [mAU*s] | Height [mAU] | Area %  |
|--------|---------------|------|-------------|--------------|--------------|---------|
| 1      | 5.350         | BB   | 0.1498      | 7733.61230   | 792.59088    | 98.6202 |
| 2      | 7.939         | BB   | 0.1760      | 108.20496    | 9.63514      | 1.3798  |

HPLC traces of enantiomer of 4k

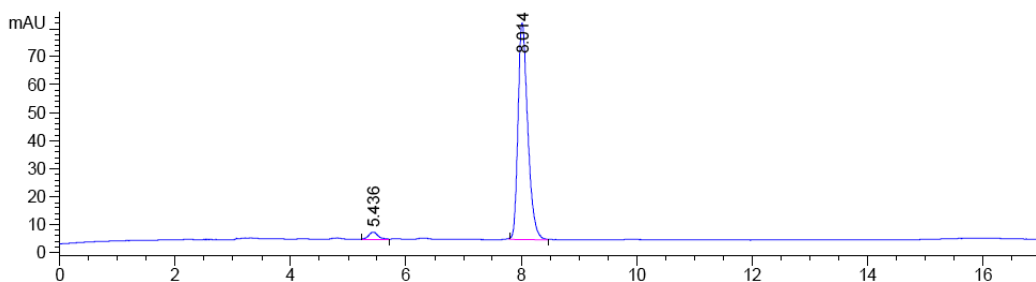

| Peak # | RetTime [min] | Type | Width [min] | Area [mAU*s] | Height [mAU] | Area %  |
|--------|---------------|------|-------------|--------------|--------------|---------|
| 1      | 5.436         | BB   | 0.1576      | 27.62828     | 2.56562      | 2.9586  |
| 2      | 8.014         | BB   | 0.1799      | 906.18811    | 77.20967     | 97.0414 |

#### 4.12 $^1\text{H}$ and $^{13}\text{C}$ -NMR spectra and HPLC traces of compound 41

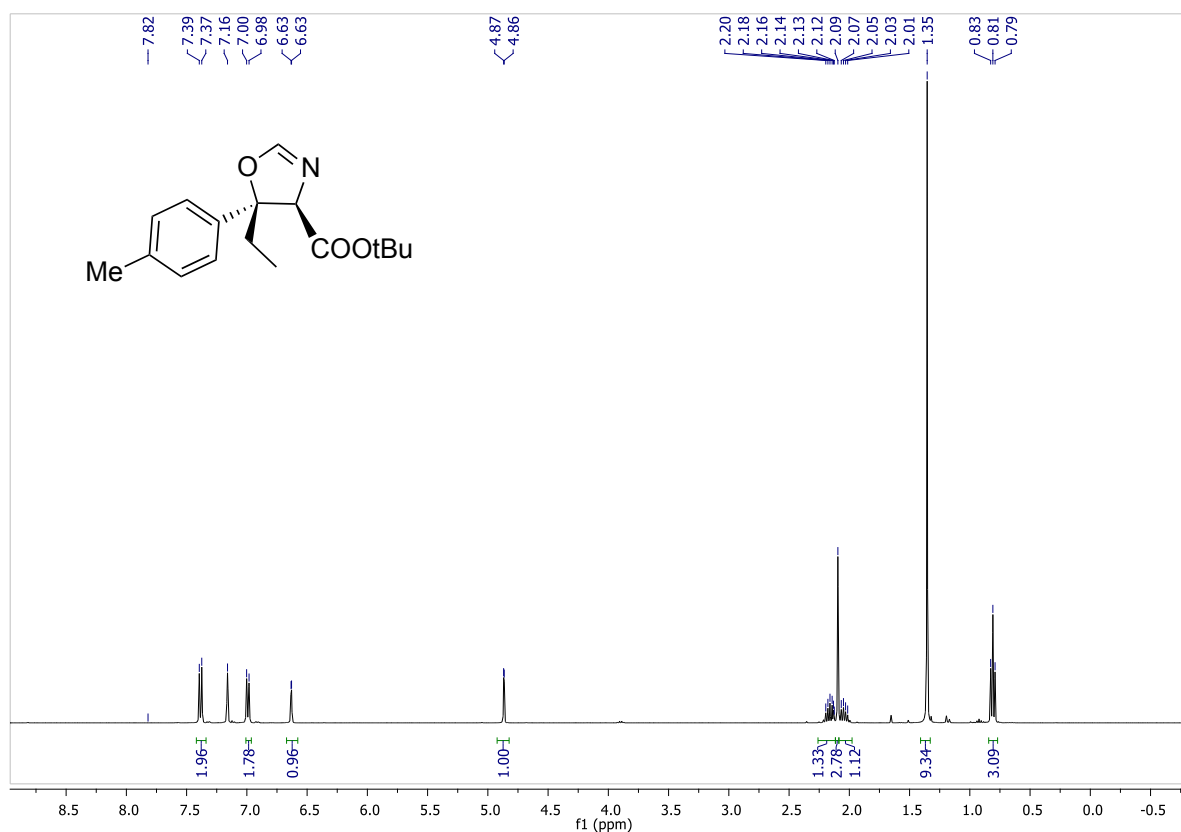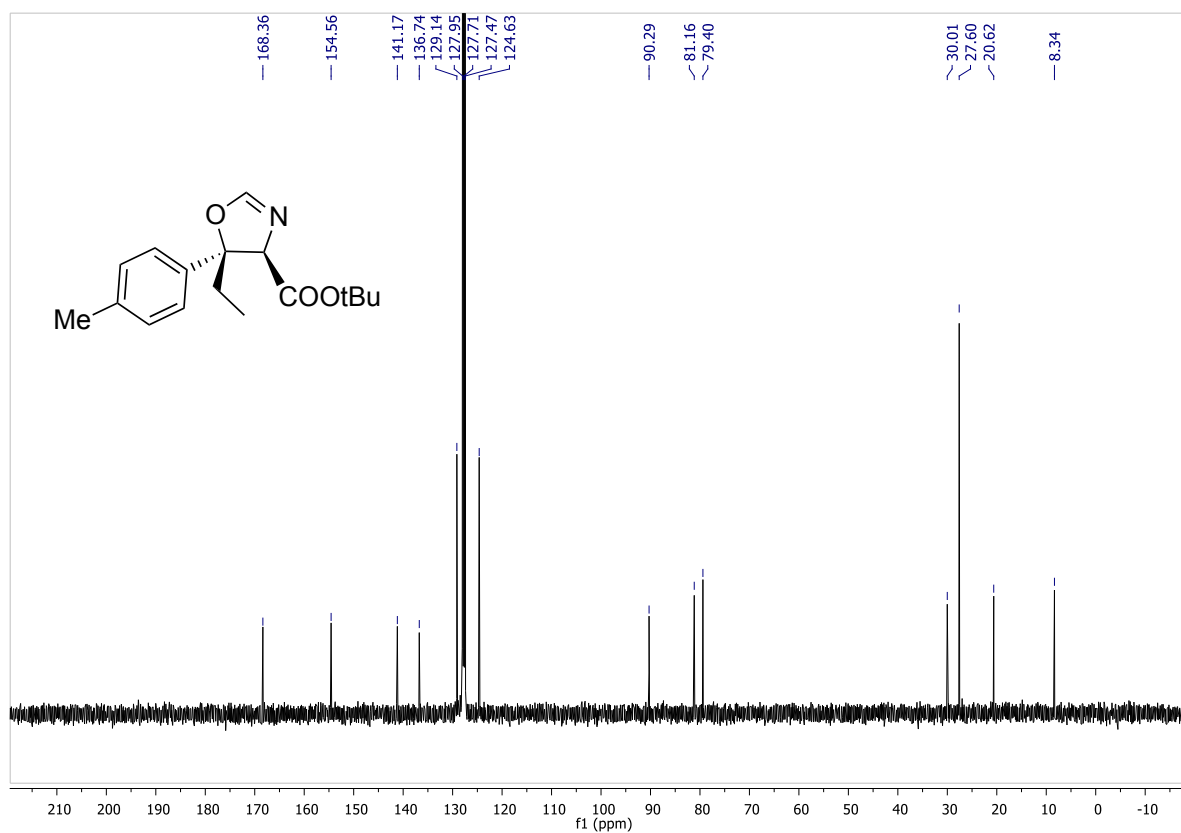

HPLC traces of 41

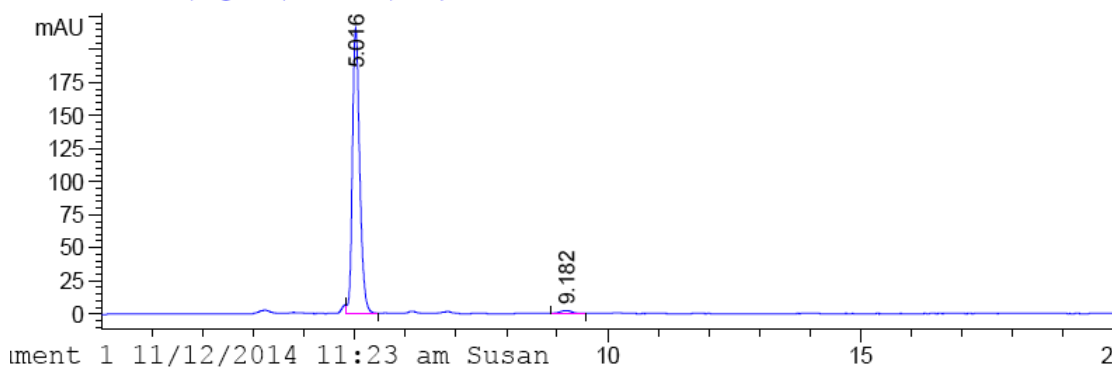

| Peak # | RetTime [min] | Type | Width [min] | Area [mAU*s] | Height [mAU] | Area %  |
|--------|---------------|------|-------------|--------------|--------------|---------|
| 1      | 5.016         | VB   | 0.1558      | 2176.78711   | 215.60901    | 98.3320 |
| 2      | 9.182         | BB   | 0.2305      | 36.92415     | 2.33460      | 1.6680  |

HPLC traces of the enantiomer of 41

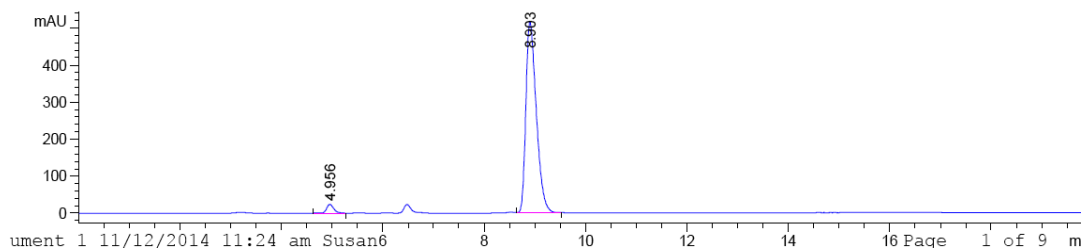

| Peak # | RetTime [min] | Type | Width [min] | Area [mAU*s] | Height [mAU] | Area %  |
|--------|---------------|------|-------------|--------------|--------------|---------|
| 1      | 4.956         | BB   | 0.1553      | 245.42758    | 23.99260     | 3.2051  |
| 2      | 8.903         | VB   | 0.2191      | 7412.03564   | 517.47772    | 96.7949 |

HPCL of mixture of both enantiomers

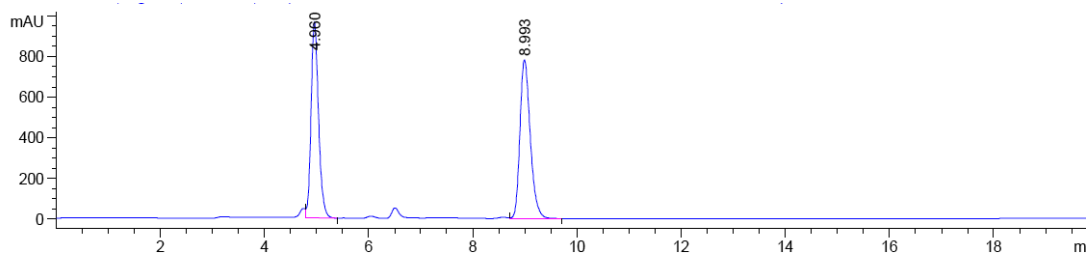

| Peak # | RetTime [min] | Type | Width [min] | Area [mAU*s] | Height [mAU] | Area %  |
|--------|---------------|------|-------------|--------------|--------------|---------|
| 1      | 4.960         | VV   | 0.1547      | 9606.81641   | 960.66986    | 47.2613 |
| 2      | 8.993         | VB   | 0.2103      | 1.07202e4    | 780.04425    | 52.7387 |

### 4.13 $^1\text{H}$ and $^{13}\text{C}$ -NMR spectra and HPLC traces of compound 4m

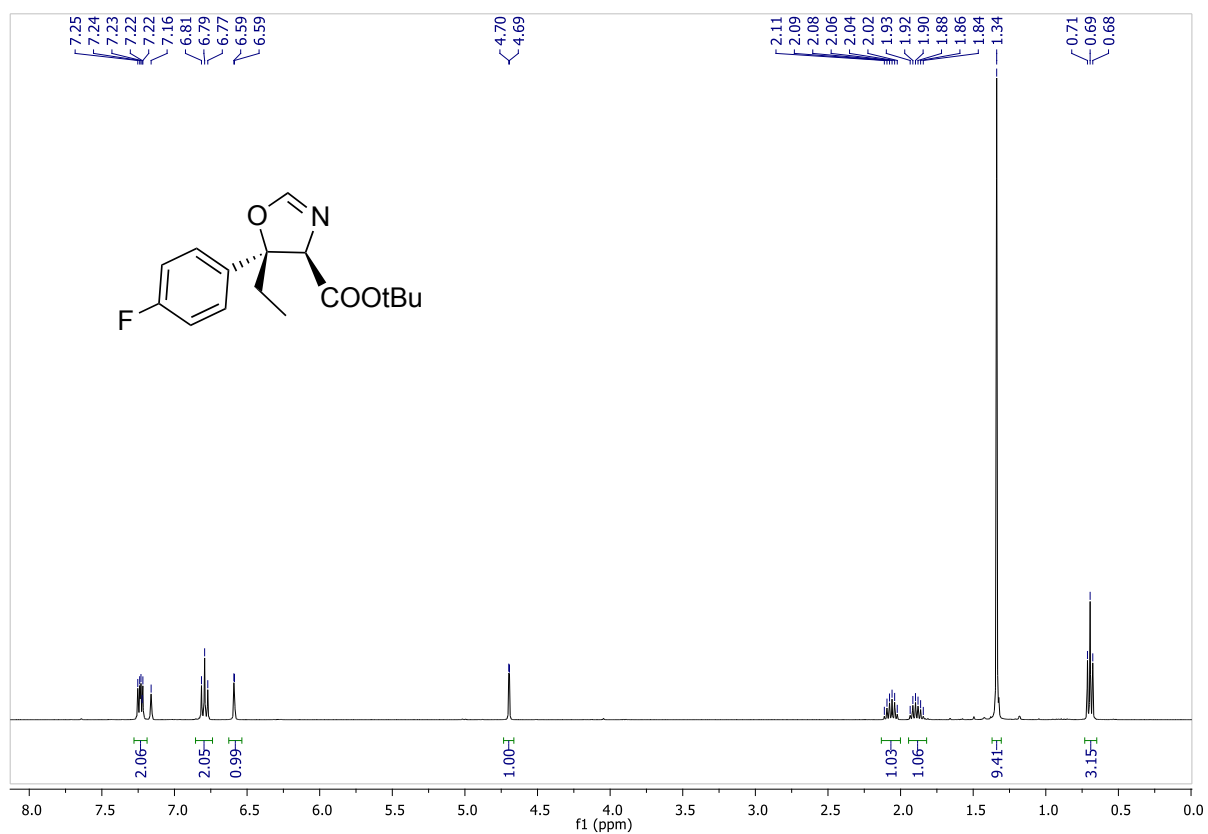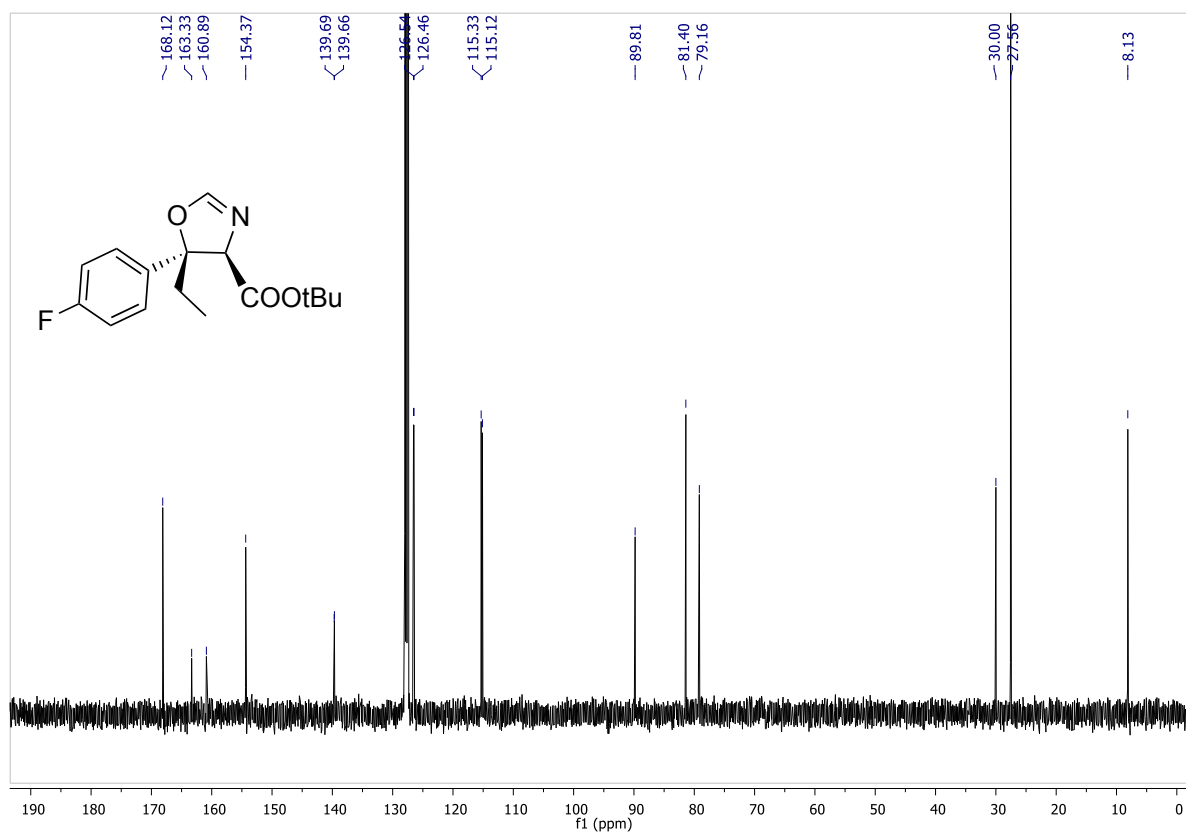

HPLC traces of racemic compound

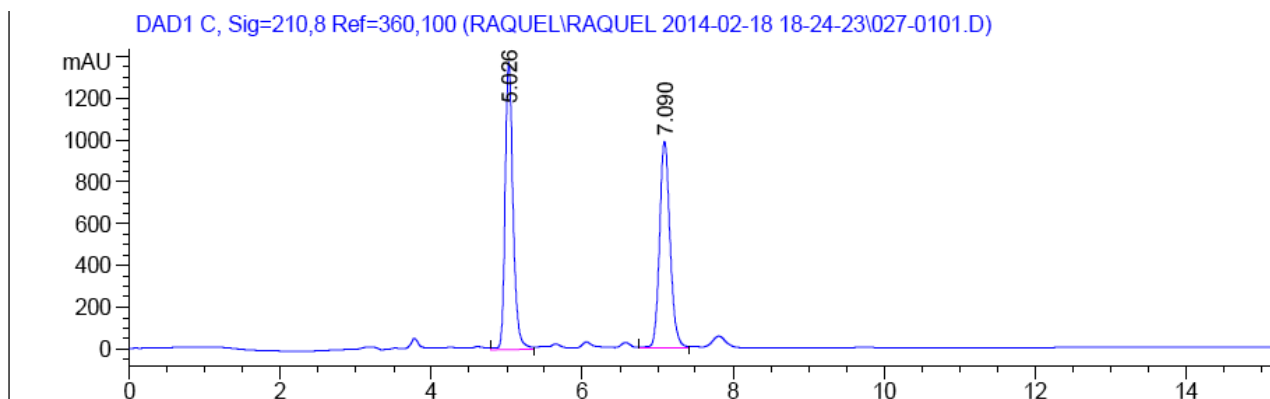

| Peak # | RetTime [min] | Type | Width [min] | Area [mAU*s] | Height [mAU] | Area %  |
|--------|---------------|------|-------------|--------------|--------------|---------|
| 1      | 5.026         | VV   | 0.1113      | 1.00346e4    | 1372.18091   | 50.8881 |
| 2      | 7.090         | VV   | 0.1500      | 9684.30469   | 991.10419    | 49.1119 |

Totals : 1.97189e4 2363.28510

HPLC traces of 4m

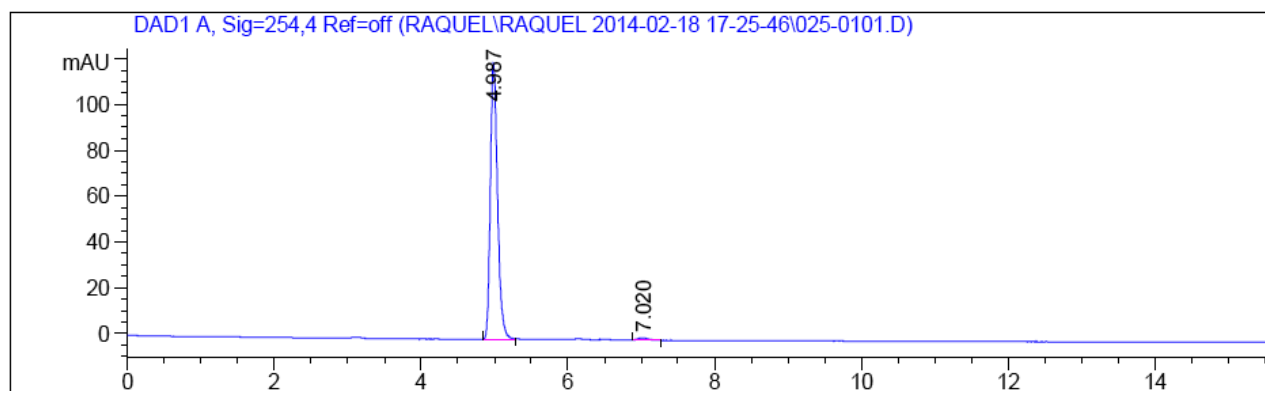

| Peak # | RetTime [min] | Type | Width [min] | Area [mAU*s] | Height [mAU] | Area %  |
|--------|---------------|------|-------------|--------------|--------------|---------|
| 1      | 4.987         | BB   | 0.1043      | 818.36011    | 120.46494    | 98.8065 |
| 2      | 7.020         | BB   | 0.1407      | 9.88481      | 1.03221      | 1.1935  |

#### 4.14 $^1\text{H}$ and $^{13}\text{C}$ -NMR spectra and HPLC traces of compound 4n

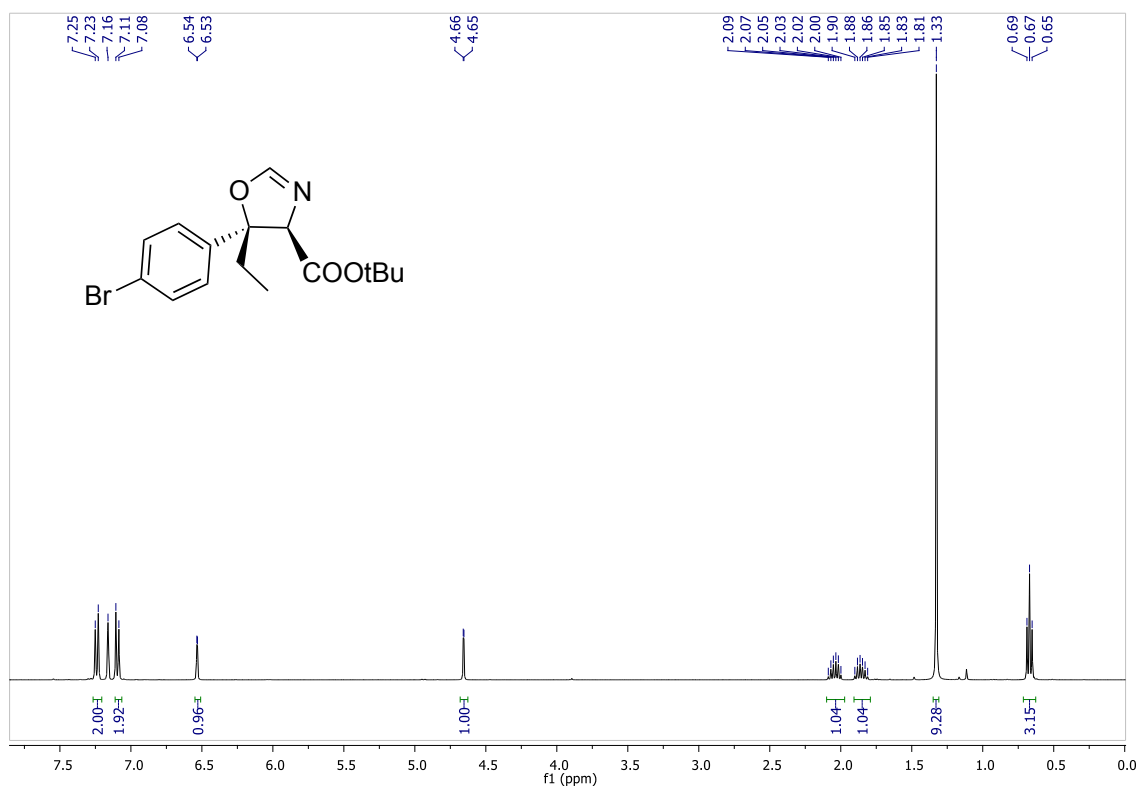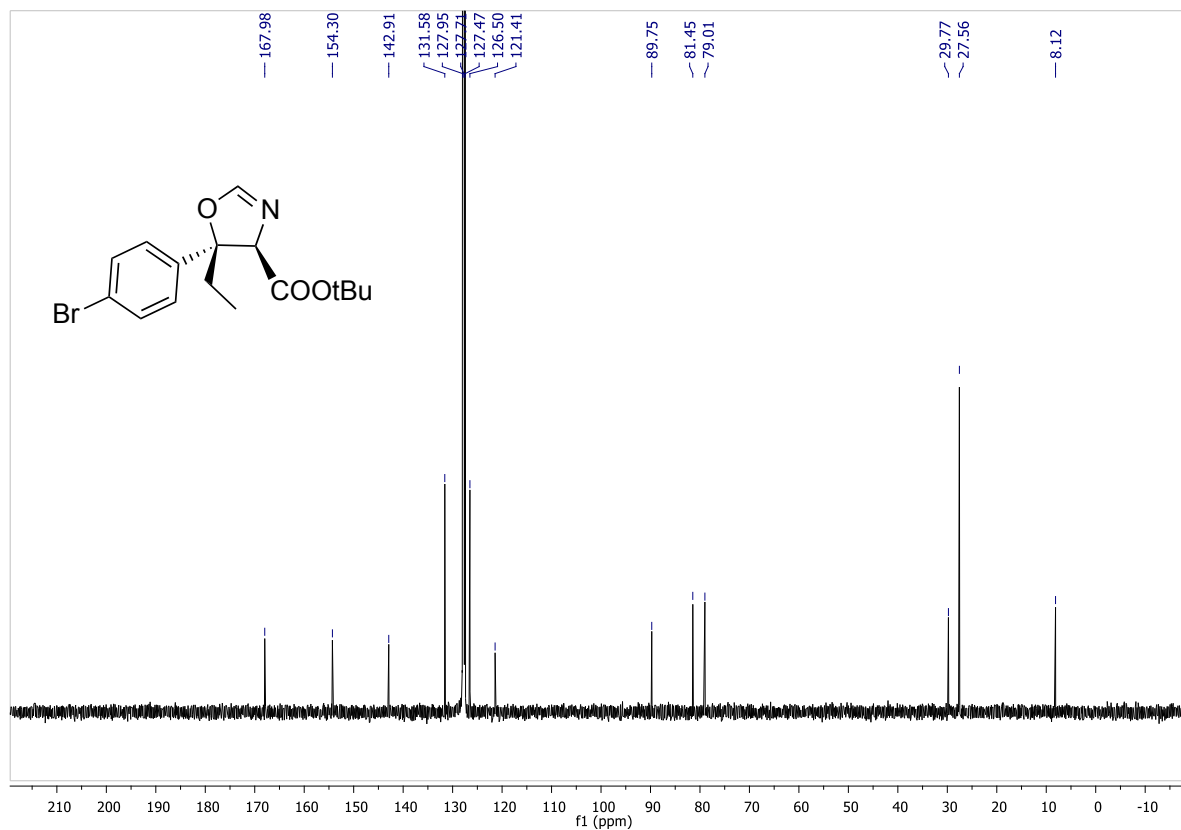

HPLC traces of racemic compound

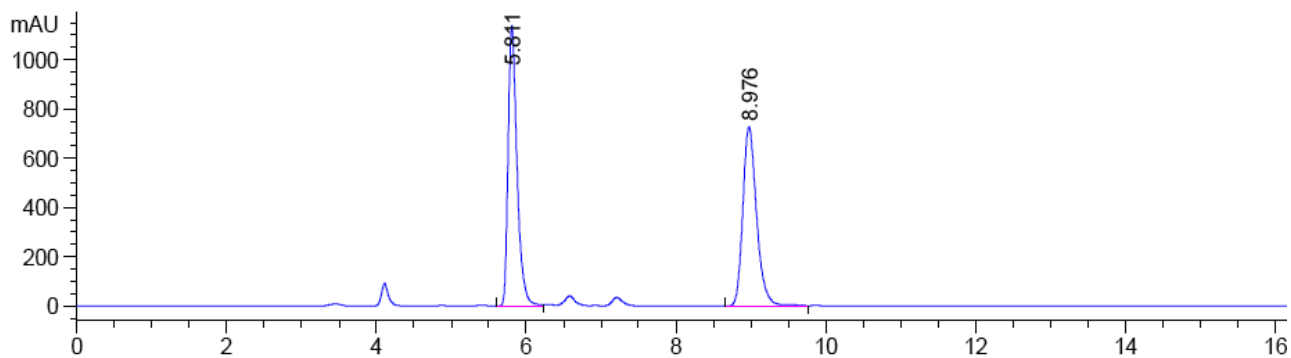

| Peak # | RetTime [min] | Type | Width [min] | Area [mAU*s] | Height [mAU] | Area %  |
|--------|---------------|------|-------------|--------------|--------------|---------|
| 1      | 5.811         | VV   | 0.1285      | 9434.42578   | 1140.90820   | 50.2442 |
| 2      | 8.976         | VV   | 0.1979      | 9342.73047   | 727.04376    | 49.7558 |

HPLC traces of 4n

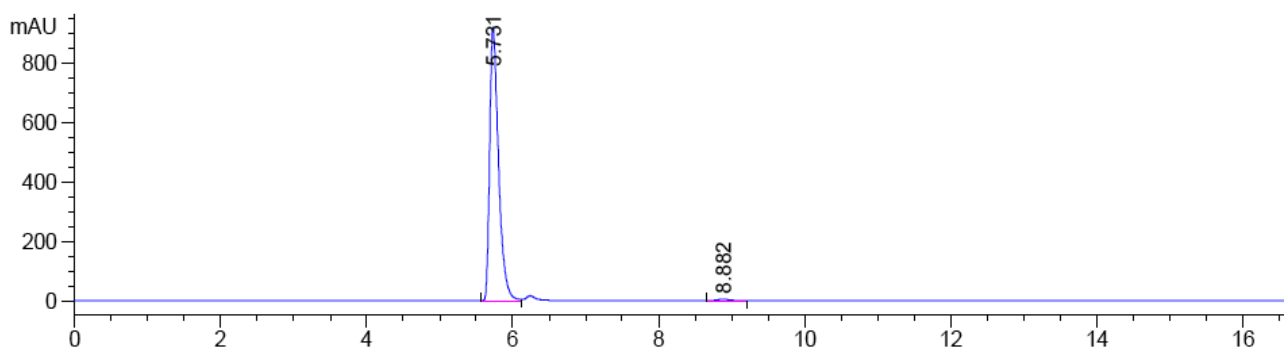

| Peak # | RetTime [min] | Type | Width [min] | Area [mAU*s] | Height [mAU] | Area %  |
|--------|---------------|------|-------------|--------------|--------------|---------|
| 1      | 5.731         | BV   | 0.1274      | 7774.39209   | 921.44147    | 99.3077 |
| 2      | 8.882         | BB   | 0.1735      | 54.19931     | 4.53205      | 0.6923  |



#### 4.15 $^1\text{H}$ and $^{13}\text{C}$ -NMR spectra and HPLC traces of compound 4o

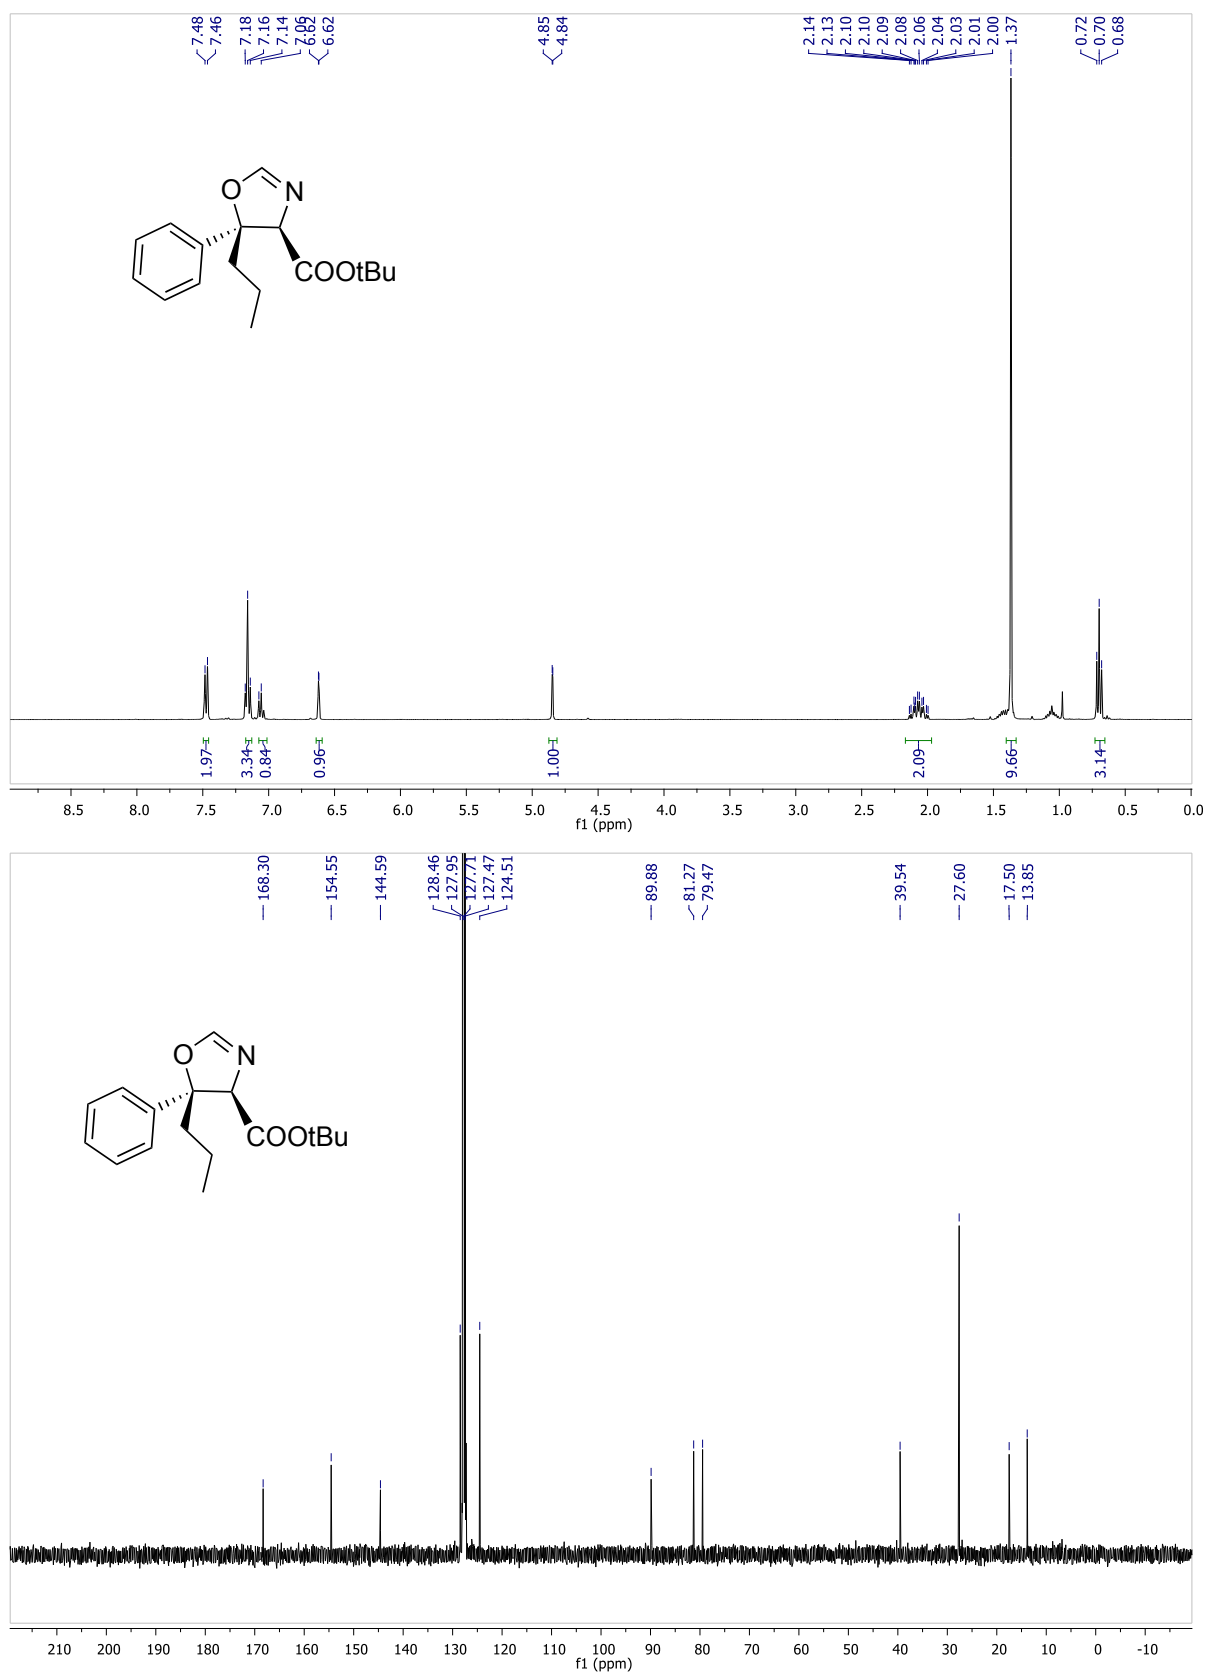

HPLC traces of racemic compound

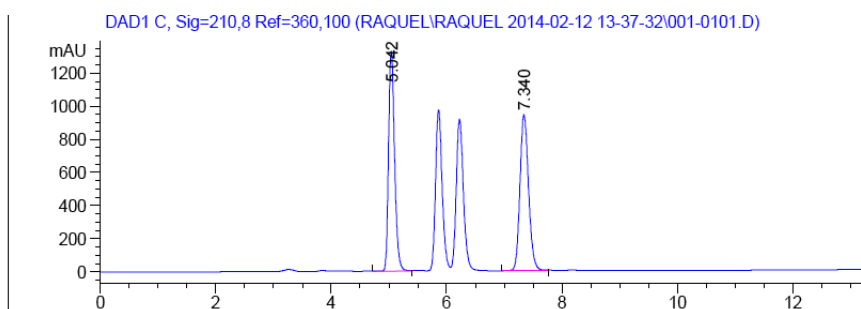

| Peak # | RetTime [min] | Type | Width [min] | Area [mAU*s] | Height [mAU] | Area %  |
|--------|---------------|------|-------------|--------------|--------------|---------|
| 1      | 5.042         | VV   | 0.1128      | 9642.98633   | 1326.78284   | 49.5509 |
| 2      | 7.340         | BB   | 0.1618      | 9817.77734   | 940.26056    | 50.4491 |

HPLC traces of 4o

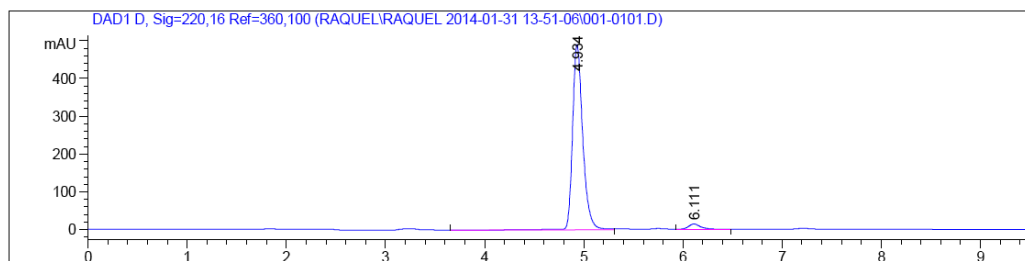

| Peak # | RetTime [min] | Type | Width [min] | Area [mAU*s] | Height [mAU] | Area %   |
|--------|---------------|------|-------------|--------------|--------------|----------|
| 1      | 4.931         | BB   | 0.1074      | 174.25977    | 24.98550     | 100.0000 |

HPLC traces of the enantiomer of 4o

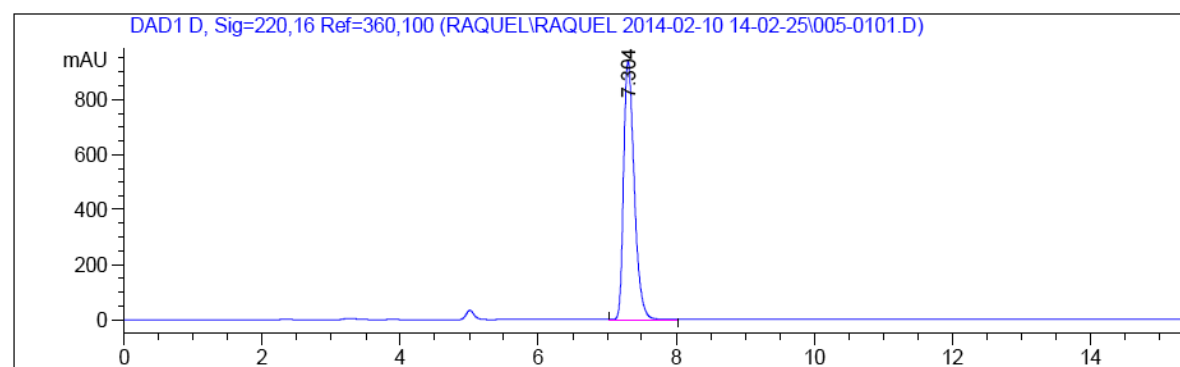

| Peak # | RetTime [min] | Type | Width [min] | Area [mAU*s] | Height [mAU] | Area %   |
|--------|---------------|------|-------------|--------------|--------------|----------|
| 1      | 7.304         | BV   | 0.1646      | 1.00548e4    | 941.15955    | 100.0000 |

HPLC traces of mixture of both enantiomers

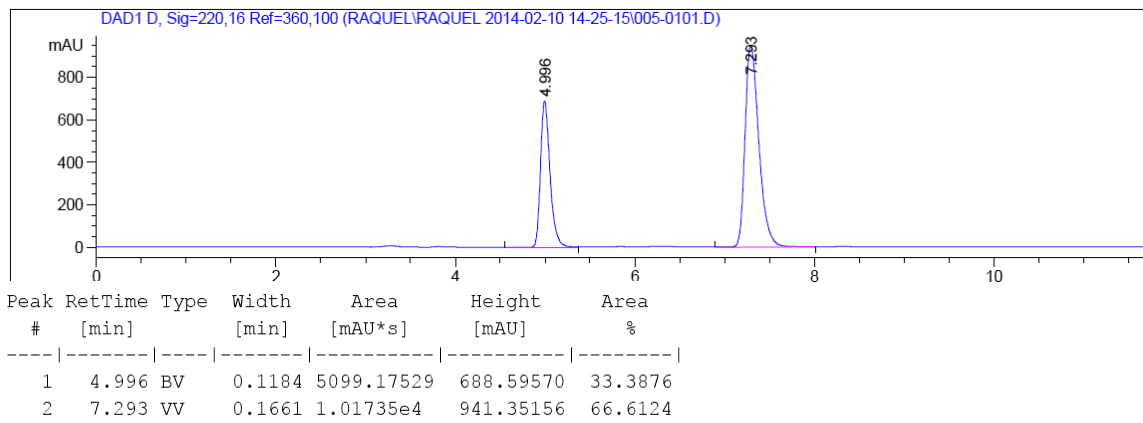

#### 4.16 $^1\text{H}$ and $^{13}\text{C}$ -NMR spectra and HPLC traces of compound 4p

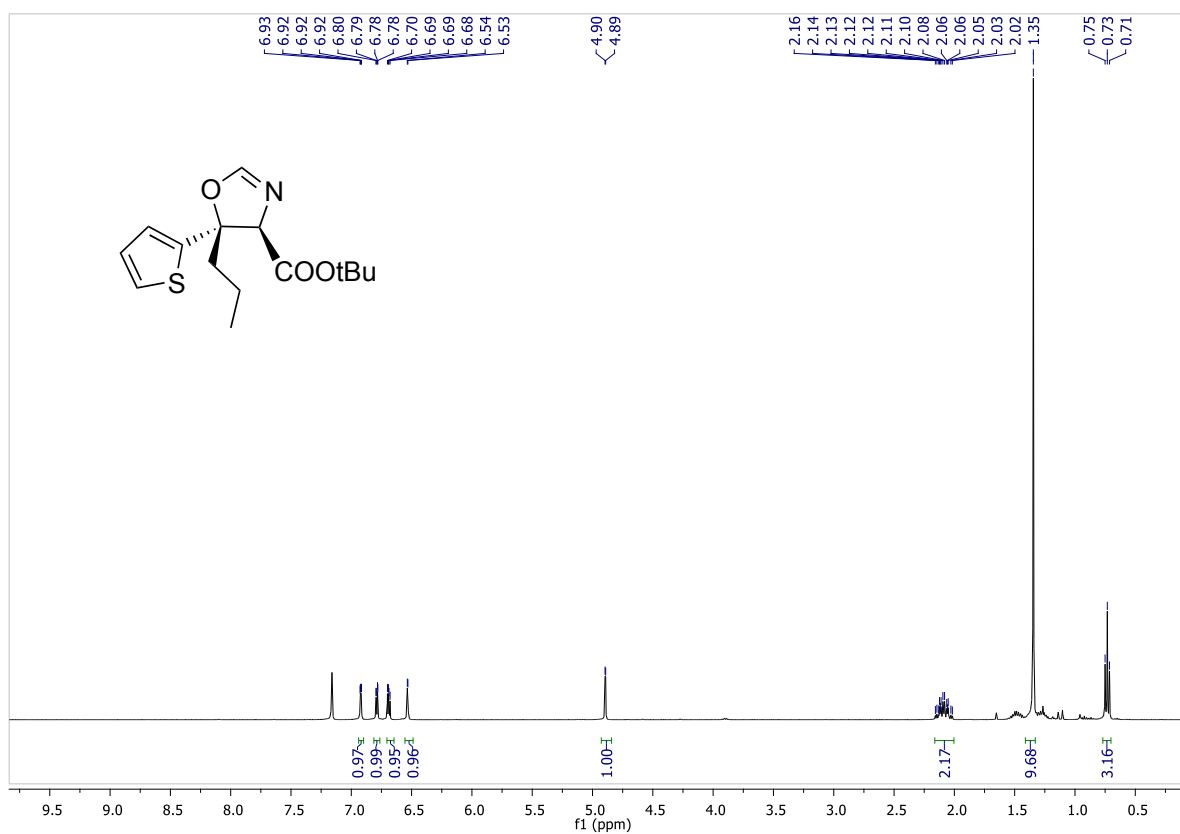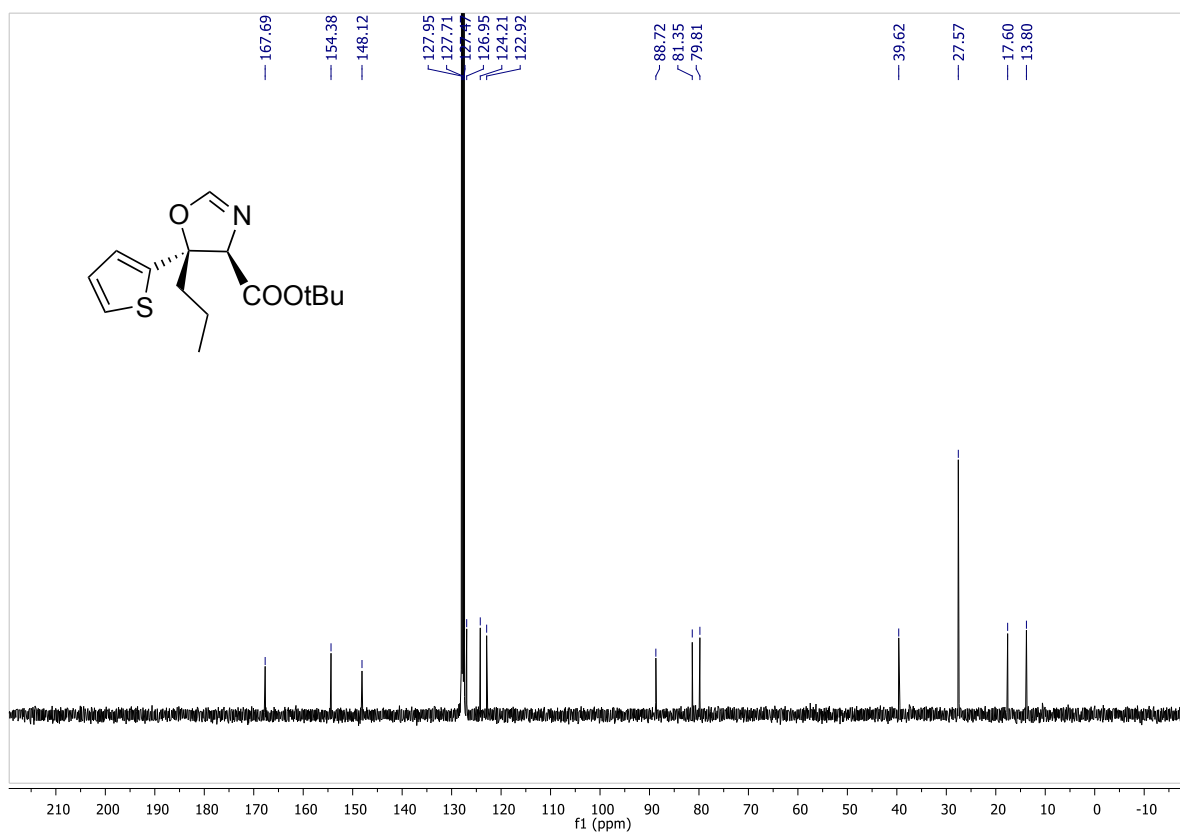

HPLC traces of racemic compound

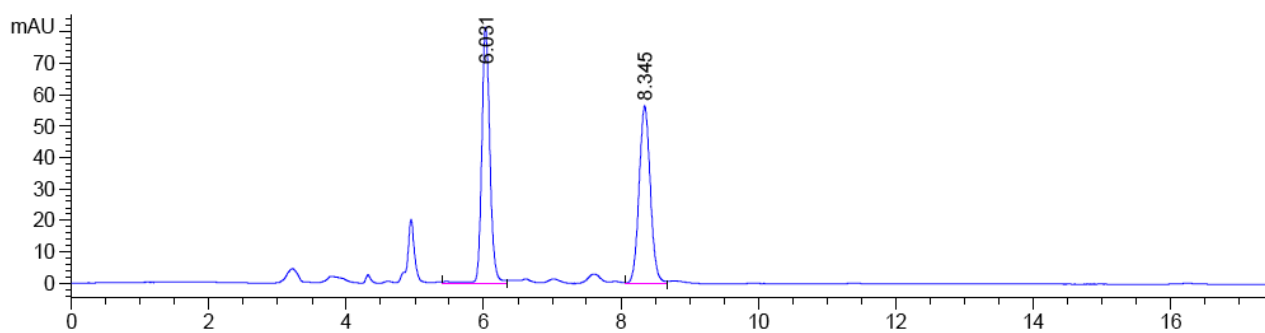

| Peak # | RetTime [min] | Type | Width [min] | Area [mAU*s] | Height [mAU] | Area %  |
|--------|---------------|------|-------------|--------------|--------------|---------|
| 1      | 6.031         | BB   | 0.1246      | 387.05649    | 47.71211     | 51.7795 |
| 2      | 8.345         | VB   | 0.1757      | 360.45273    | 31.92039     | 48.2205 |

HPLC traces of 4p

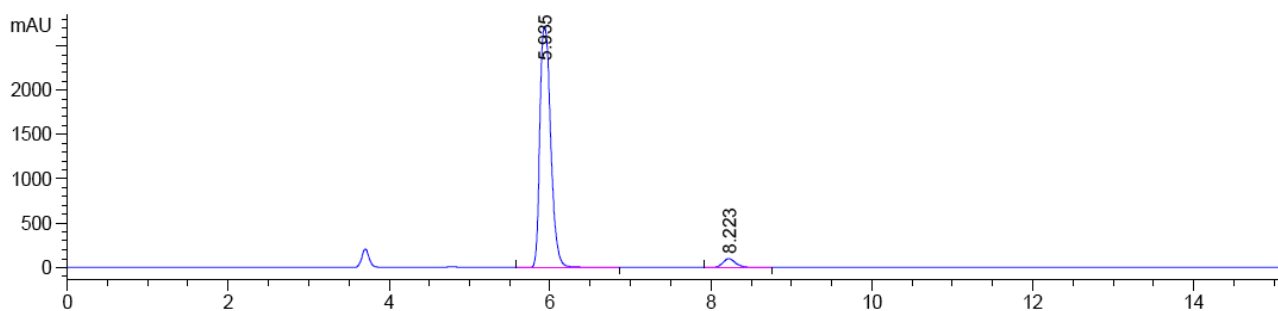

| Peak # | RetTime [min] | Type | Width [min] | Area [mAU*s] | Height [mAU] | Area %  |
|--------|---------------|------|-------------|--------------|--------------|---------|
| 1      | 5.932         | BB   | 0.1267      | 1.60698e4    | 1938.75146   | 96.3445 |
| 2      | 8.222         | BB   | 0.1673      | 609.71246    | 55.86193     | 3.6555  |

### 4.17 $^1\text{H}$ and $^{13}\text{C}$ -NMR spectra and HPLC traces of compound 4q

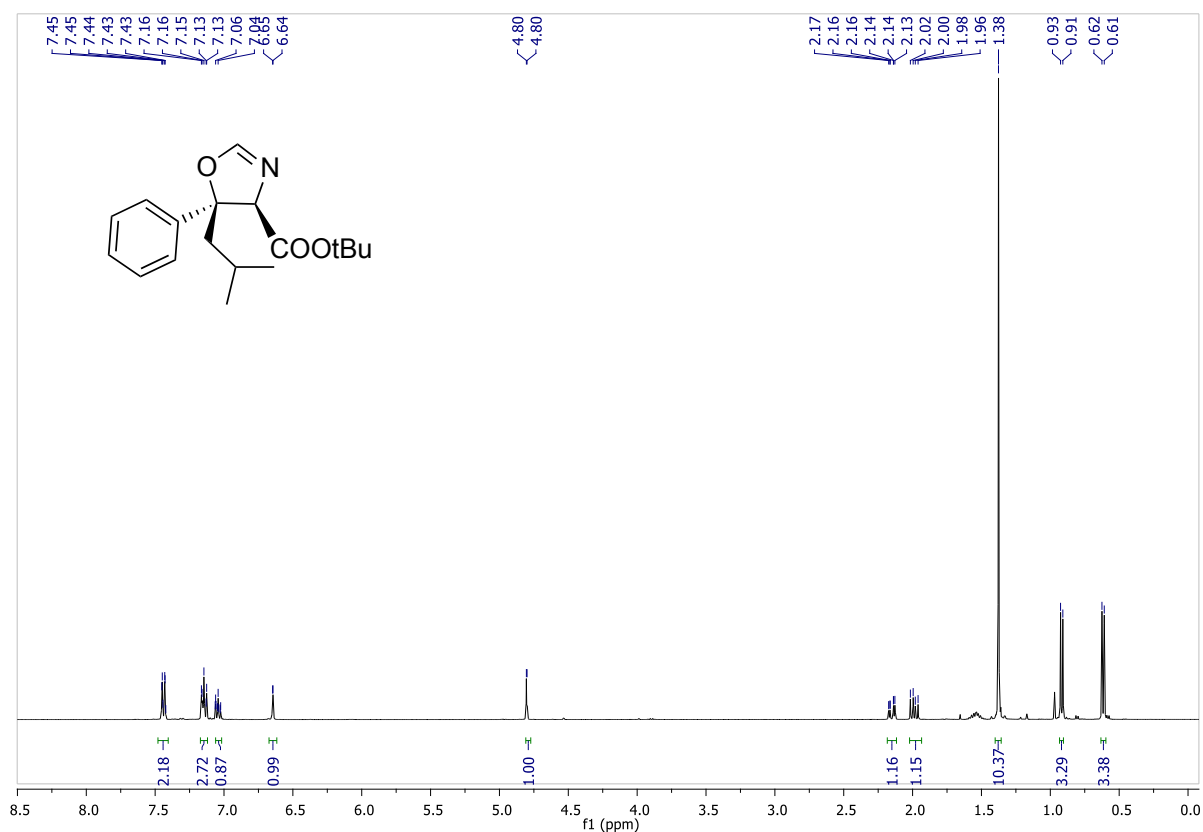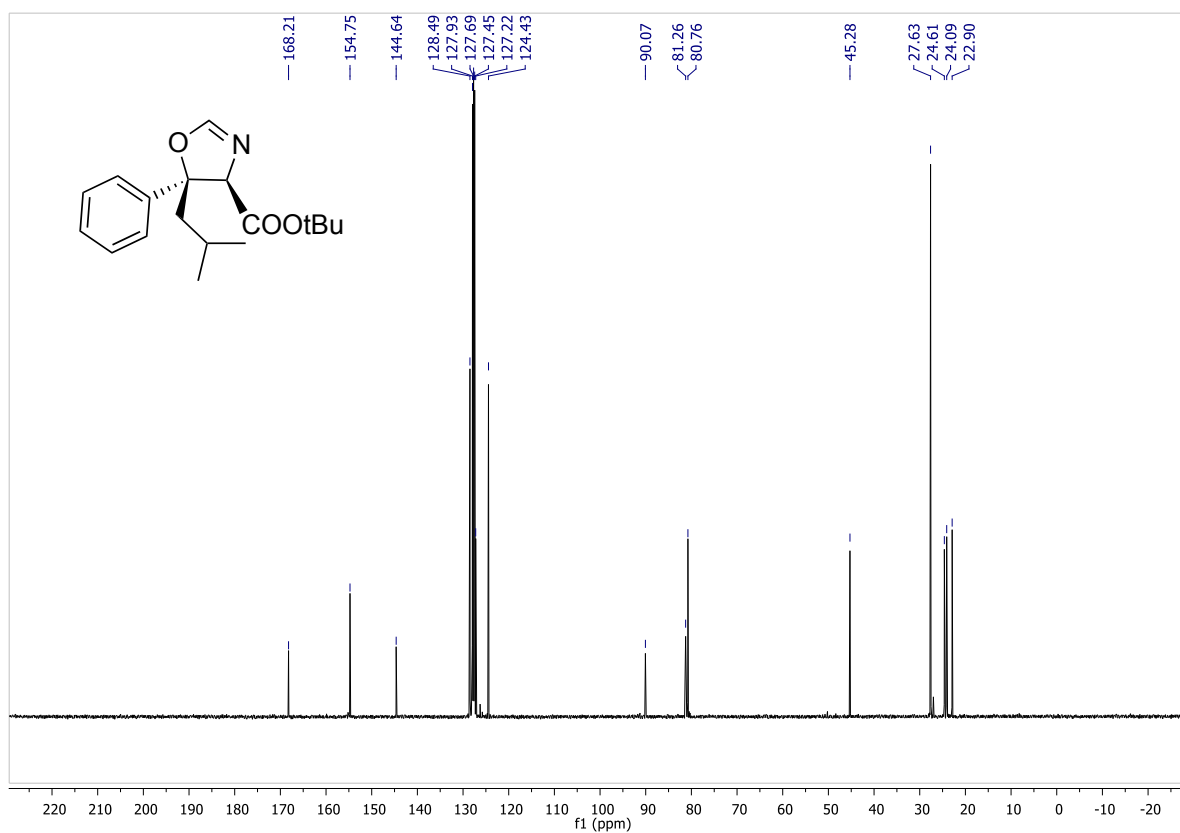

HPLC traces of **4q**

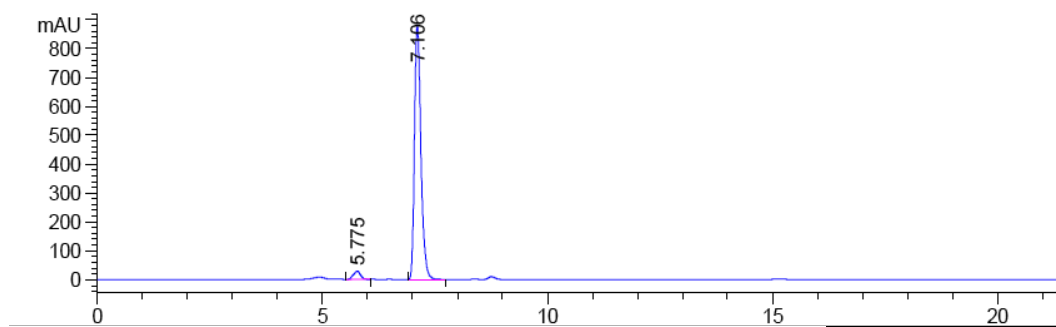

| Peak # | RetTime [min] | Type | Width [min] | Area [mAU*s] | Height [mAU] | Area %  |
|--------|---------------|------|-------------|--------------|--------------|---------|
| 1      | 5.775         | VB   | 0.1645      | 308.13486    | 28.41267     | 3.4005  |
| 2      | 7.106         | BB   | 0.1534      | 8753.33301   | 877.46674    | 96.5995 |

HPLC traces of the enantiomer of **4q**

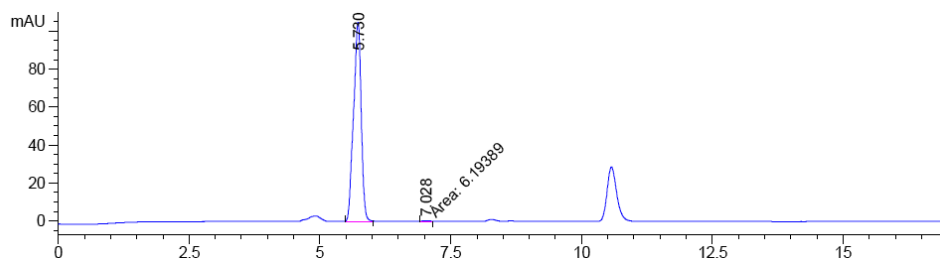

| Peak # | RetTime [min] | Type | Width [min] | Area [mAU*s] | Height [mAU] | Area %  |
|--------|---------------|------|-------------|--------------|--------------|---------|
| 1      | 5.730         | BB   | 0.1498      | 1067.13123   | 104.80763    | 99.4229 |
| 2      | 7.028         | MM   | 0.1750      | 6.19389      | 5.89914e-1   | 0.5771  |

HPLC traces of mixture of both enantiomers

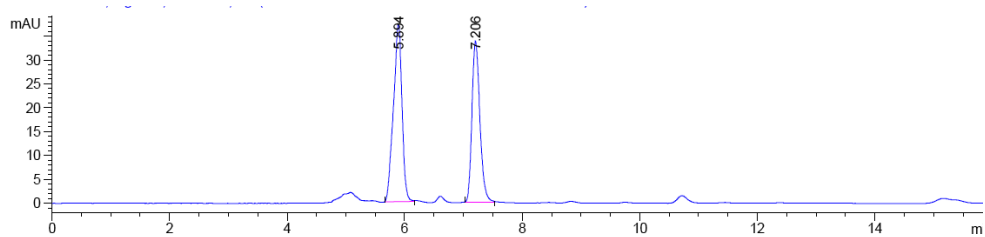

| Peak # | RetTime [min] | Type | Width [min] | Area [mAU*s] | Height [mAU] | Area %  |
|--------|---------------|------|-------------|--------------|--------------|---------|
| 1      | 5.894         | BB   | 0.1482      | 376.91049    | 37.19103     | 54.1739 |
| 2      | 7.206         | BB   | 0.1457      | 318.83081    | 33.92261     | 45.8261 |

### 4.18 $^1\text{H}$ and $^{13}\text{C}$ -NMR spectra and HPLC traces of compound 4r

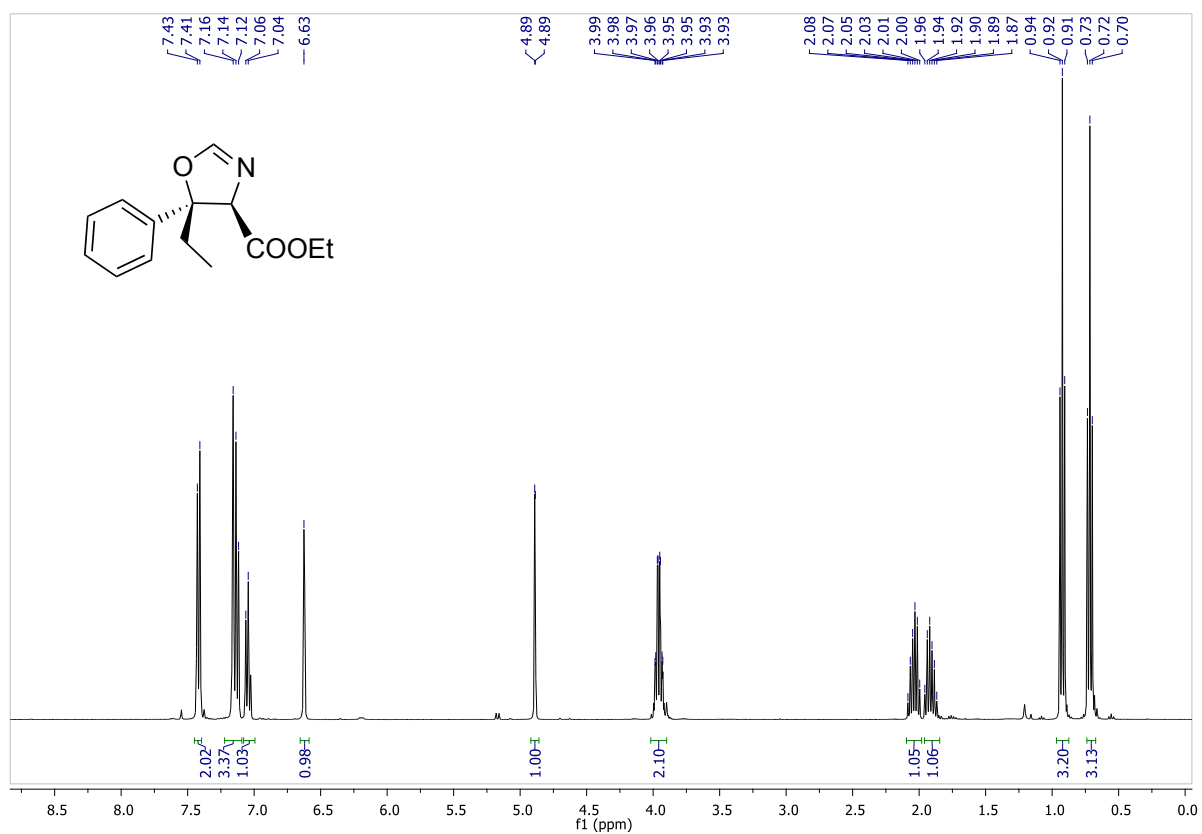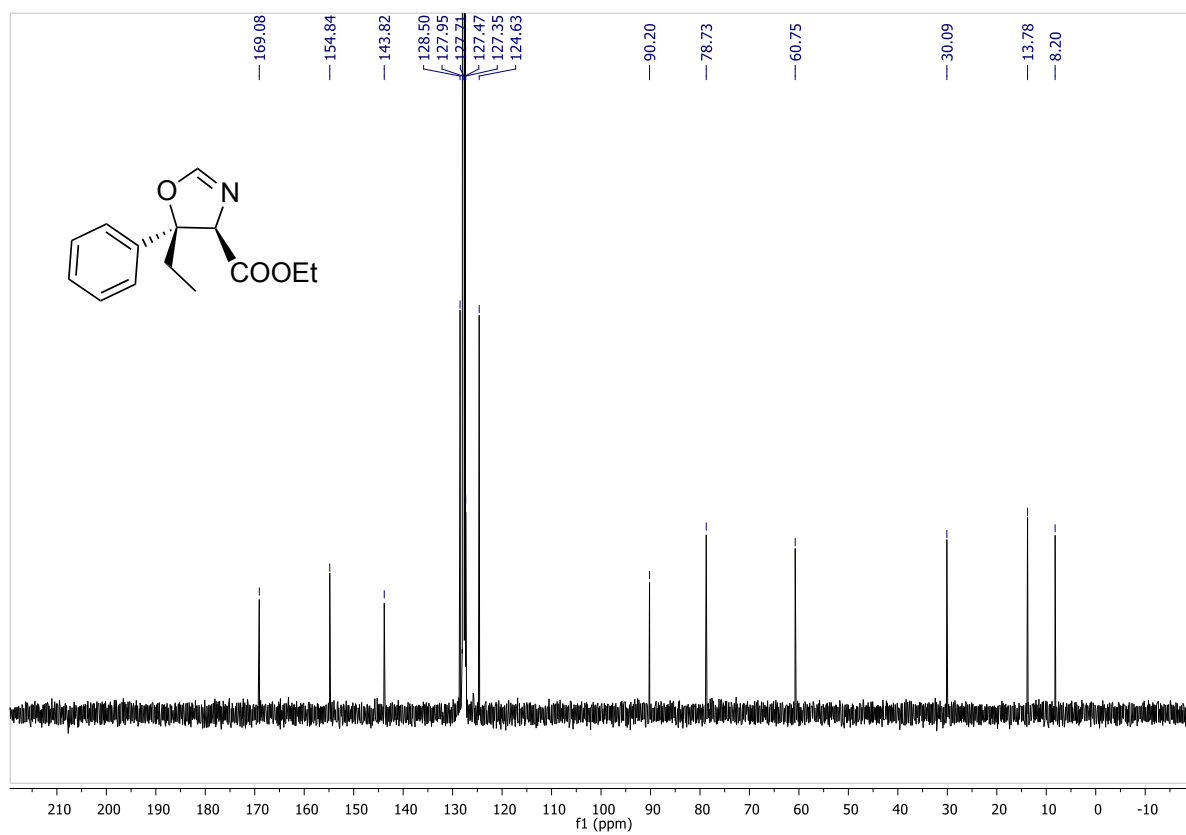



HPLC traces of 4r

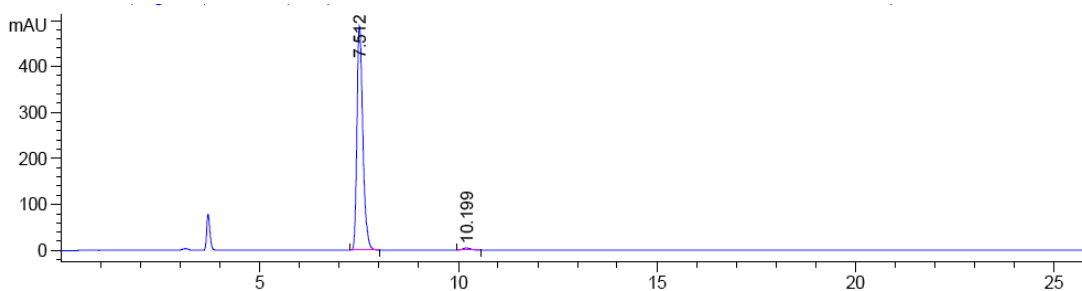

| Peak # | RetTime [min] | Type | Width [min] | Area [mAU*s] | Height [mAU] | Area %  |
|--------|---------------|------|-------------|--------------|--------------|---------|
| 1      | 7.512         | VB   | 0.1592      | 5067.86621   | 487.94693    | 98.5910 |
| 2      | 10.199        | BB   | 0.2217      | 72.42654     | 4.97817      | 1.4090  |

HPLC traces of the enantiomer of 4r

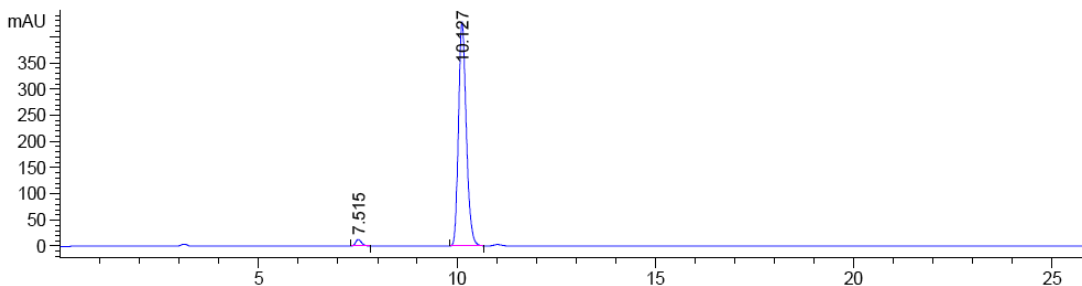

| Peak # | RetTime [min] | Type | Width [min] | Area [mAU*s] | Height [mAU] | Area %  |
|--------|---------------|------|-------------|--------------|--------------|---------|
| 1      | 7.515         | BB   | 0.1581      | 131.48410    | 12.76887     | 2.2005  |
| 2      | 10.127        | BB   | 0.2092      | 5843.82031   | 428.22617    | 97.7995 |

HPLC traces of mixture of both enantiomers

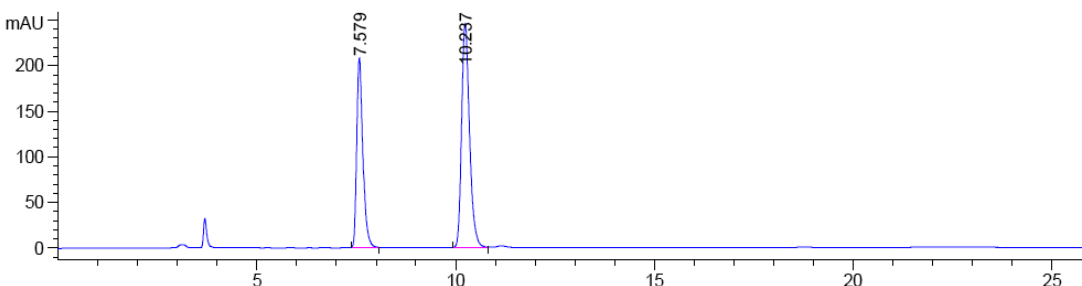

| Peak # | RetTime [min] | Type | Width [min] | Area [mAU*s] | Height [mAU] | Area %  |
|--------|---------------|------|-------------|--------------|--------------|---------|
| 1      | 7.579         | BB   | 0.1608      | 2225.79517   | 207.99393    | 39.3794 |
| 2      | 10.237        | BB   | 0.2129      | 3426.38330   | 245.46373    | 60.6206 |

#### 4.19 $^1\text{H}$ and $^{13}\text{C}$ -NMR spectra and HPLC traces of compound 4s

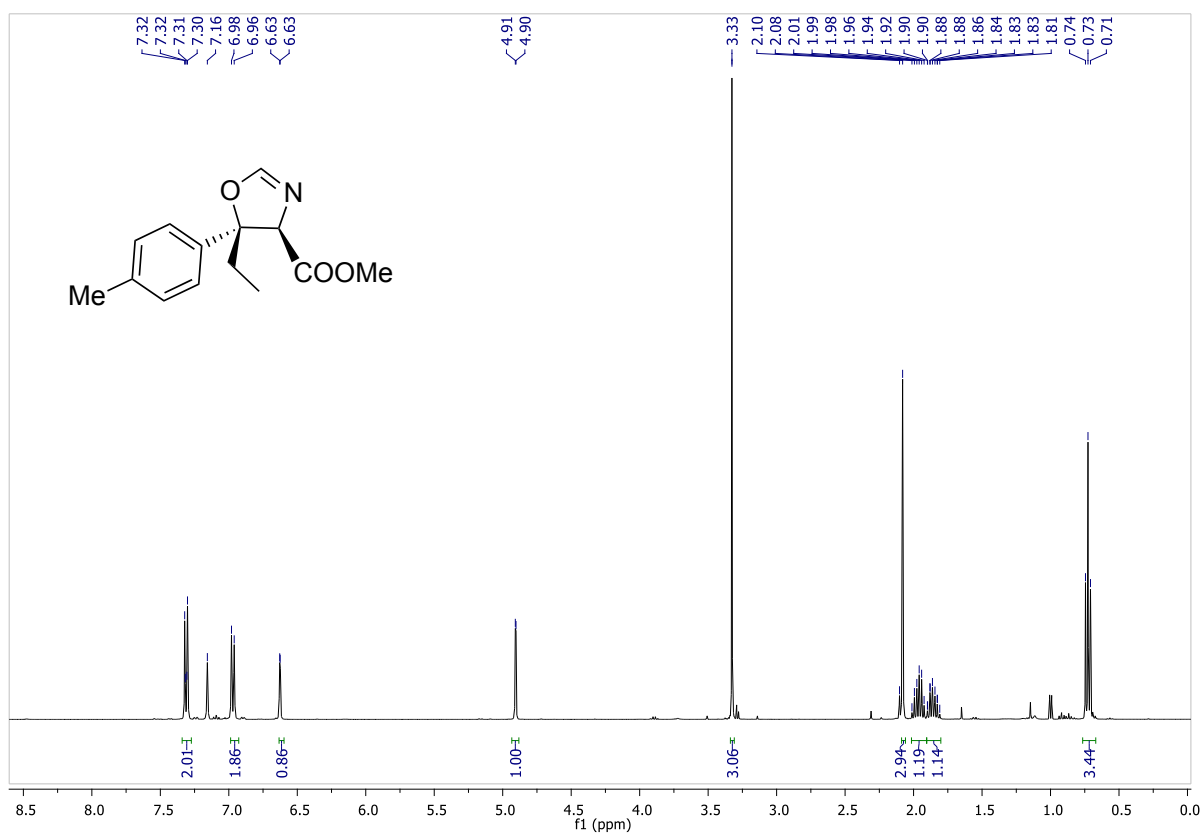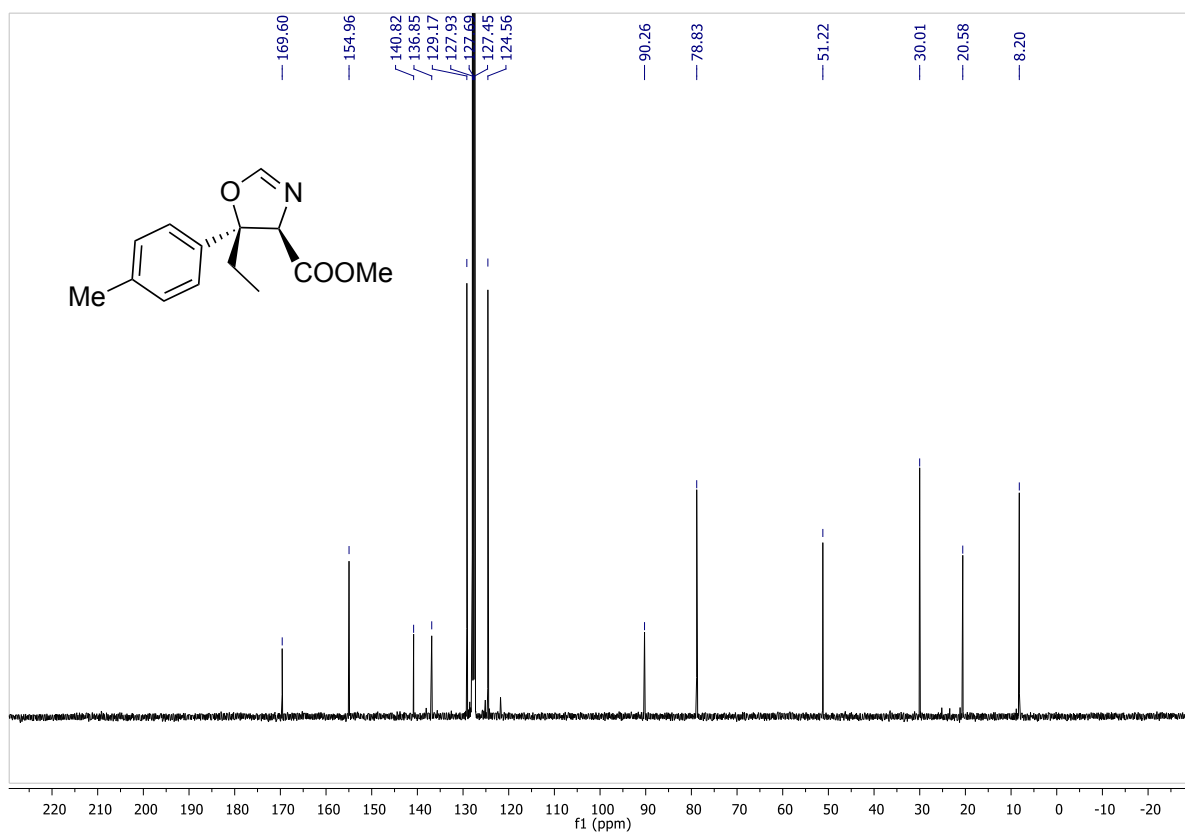

HPLC traces of racemic compound

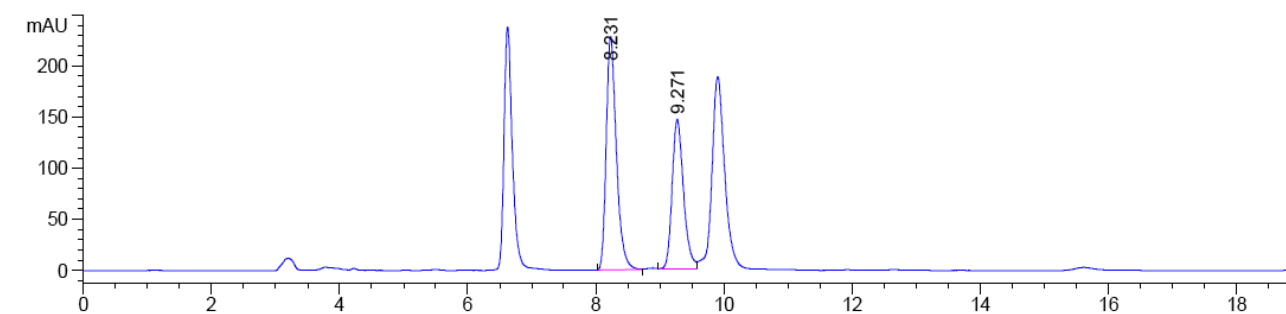

| Peak # | RetTime [min] | Type | Width [min] | Area [mAU*s] | Height [mAU] | Area %  |
|--------|---------------|------|-------------|--------------|--------------|---------|
| 1      | 8.233         | VV   | 0.1741      | 1089.13306   | 97.63374     | 59.1131 |
| 2      | 9.272         | VV   | 0.1916      | 753.32410    | 59.55931     | 40.8869 |

HPLC traces of 4s

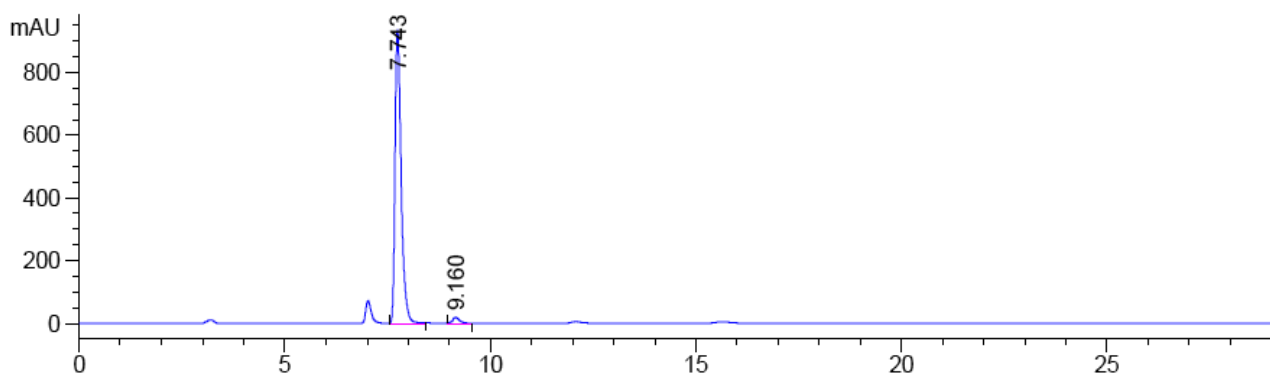

| Peak # | RetTime [min] | Type | Width [min] | Area [mAU*s] | Height [mAU] | Area %  |
|--------|---------------|------|-------------|--------------|--------------|---------|
| 1      | 7.743         | BB   | 0.1591      | 9795.77246   | 935.92224    | 97.8341 |
| 2      | 9.160         | BB   | 0.1817      | 216.85867    | 18.11472     | 2.1659  |

## 4.20 $^1\text{H}$ and $^{13}\text{C}$ -NMR spectra and HPLC traces of compound 4t

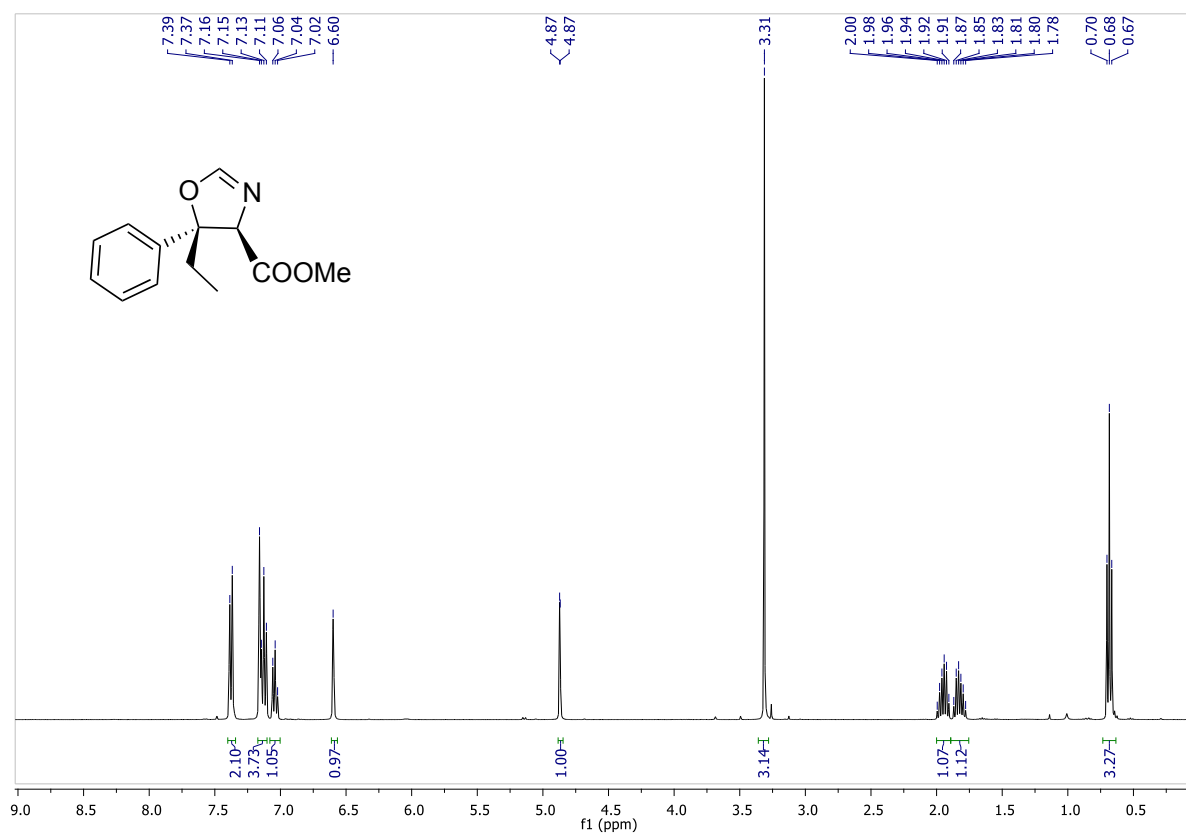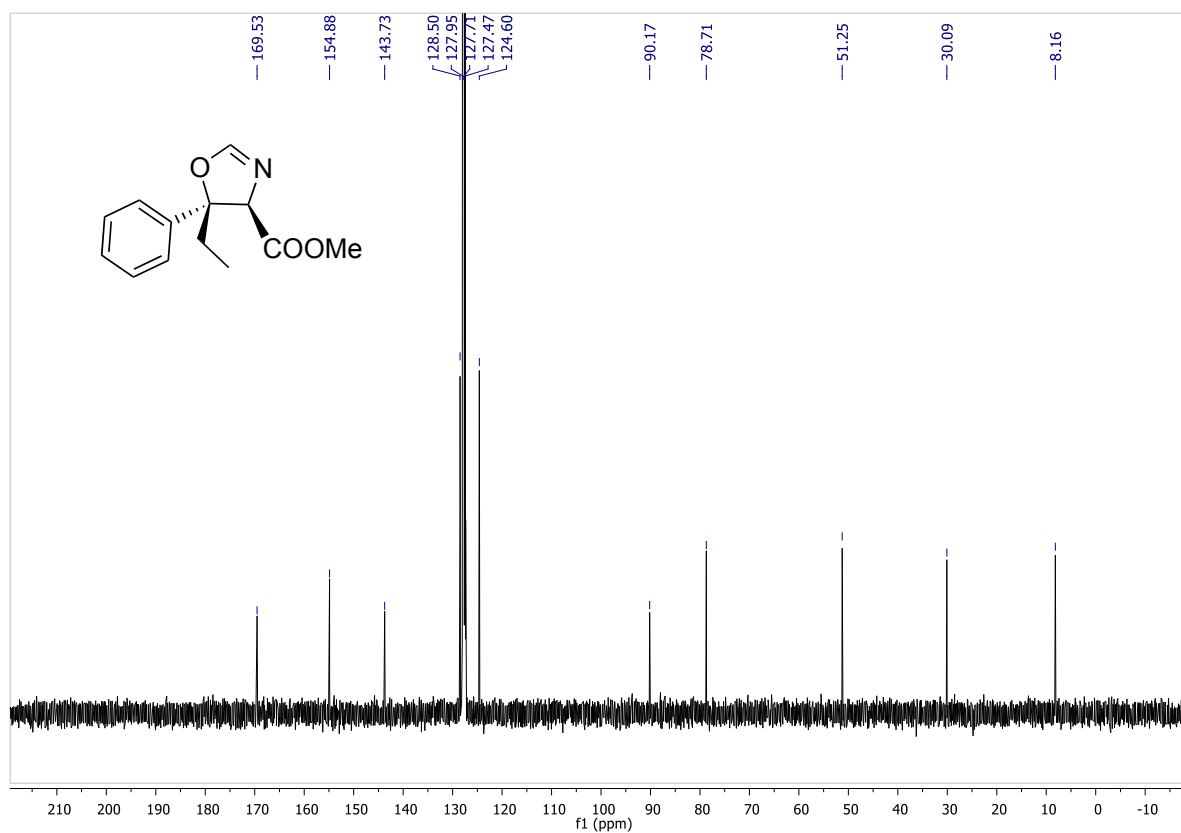

### HPLC traces of 4t

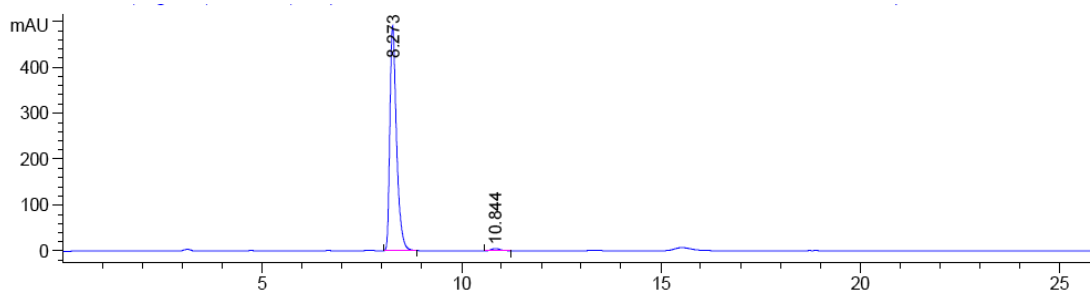

| Peak # | RetTime [min] | Type | Width [min] | Area [mAU*s] | Height [mAU] | Area %  |
|--------|---------------|------|-------------|--------------|--------------|---------|
| 1      | 8.273         | BB   | 0.1777      | 5690.38281   | 489.13629    | 98.7867 |
| 2      | 10.844        | BB   | 0.2238      | 69.89135     | 4.80098      | 1.2133  |

### HPLC traces of the enantiomer of 4t

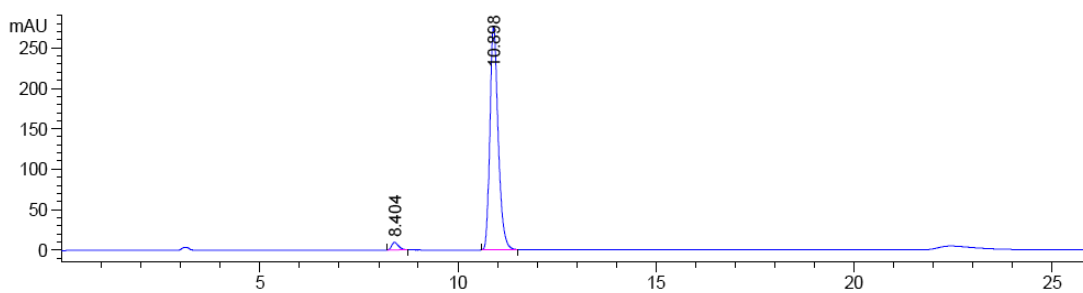

| Peak # | RetTime [min] | Type | Width [min] | Area [mAU*s] | Height [mAU] | Area %  |
|--------|---------------|------|-------------|--------------|--------------|---------|
| 1      | 8.404         | BB   | 0.1747      | 108.29958    | 9.37741      | 2.6268  |
| 2      | 10.898        | BB   | 0.2216      | 4014.64526   | 276.17184    | 97.3732 |

### HPLC traces of mixture of both enantiomers

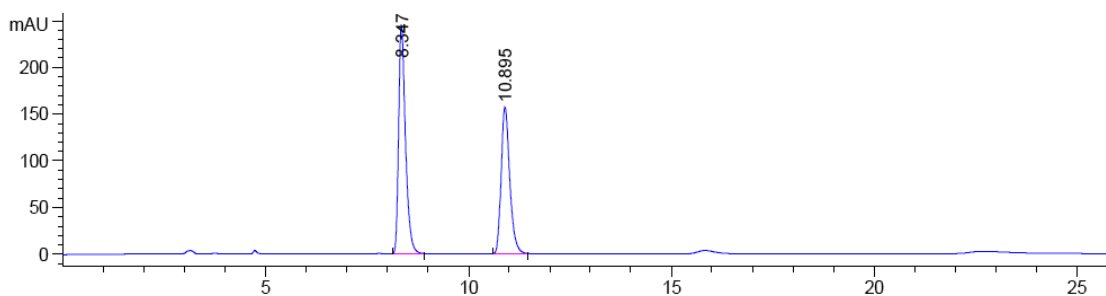

| Peak # | RetTime [min] | Type | Width [min] | Area [mAU*s] | Height [mAU] | Area %  |
|--------|---------------|------|-------------|--------------|--------------|---------|
| 1      | 8.347         | BB   | 0.1762      | 165.15140    | 14.35936     | 54.9991 |
| 2      | 10.896        | BB   | 0.2251      | 135.12869    | 9.21488      | 45.0009 |

## 4.21 $^1\text{H}$ and $^{13}\text{C}$ -NMR spectra and HPLC traces of compound 4u

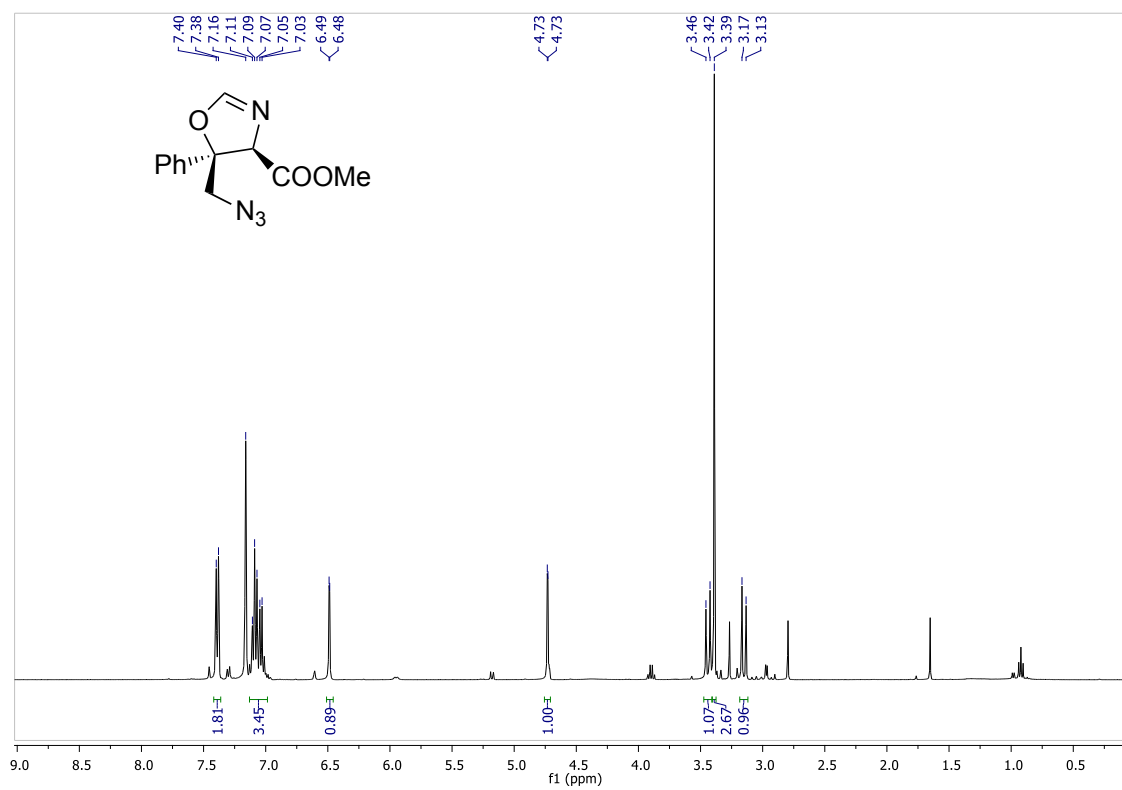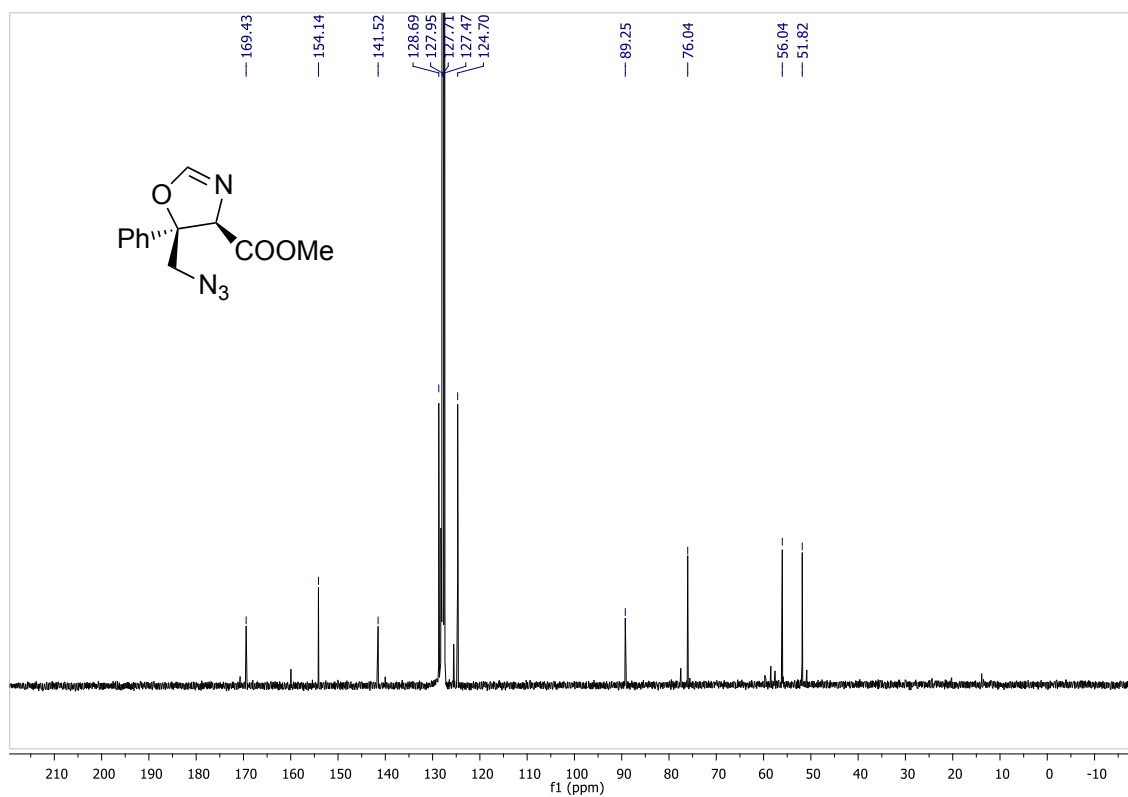

HPLC traces of racemic compound

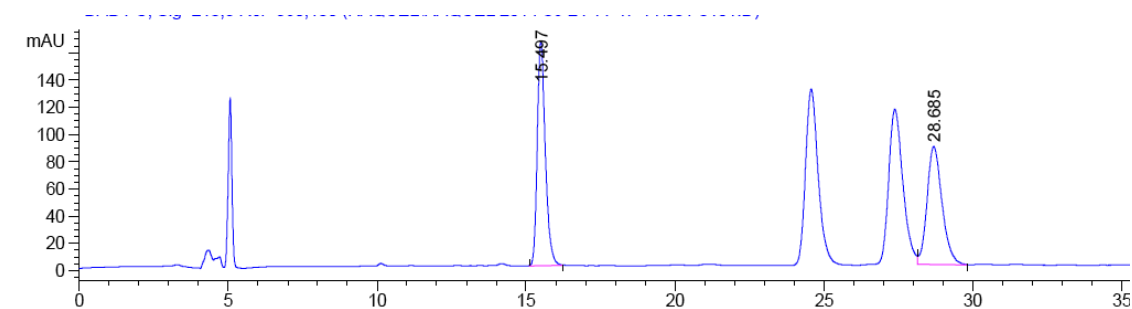

| Peak # | RetTime [min] | Type | Width [min] | Area [mAU*s] | Height [mAU] | Area %  |
|--------|---------------|------|-------------|--------------|--------------|---------|
| 1      | 15.497        | BB   | 0.2845      | 3086.36938   | 164.79169    | 50.3756 |
| 2      | 28.685        | VB   | 0.5328      | 3040.34692   | 86.75761     | 49.6244 |

HPLC traces of 4u

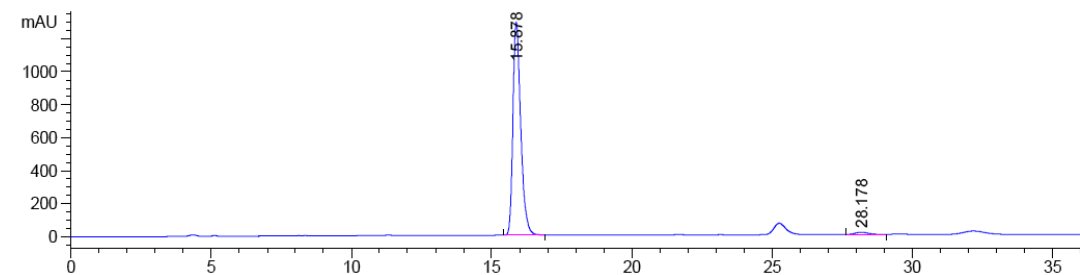

| Peak # | RetTime [min] | Type | Width [min] | Area [mAU*s] | Height [mAU] | Area %  |
|--------|---------------|------|-------------|--------------|--------------|---------|
| 1      | 15.878        | BB   | 0.2961      | 2.49750e4    | 1288.90234   | 98.4232 |
| 2      | 28.178        | BB   | 0.4804      | 400.12769    | 12.81127     | 1.5768  |

HPLC traces of the enantiomer of 4u

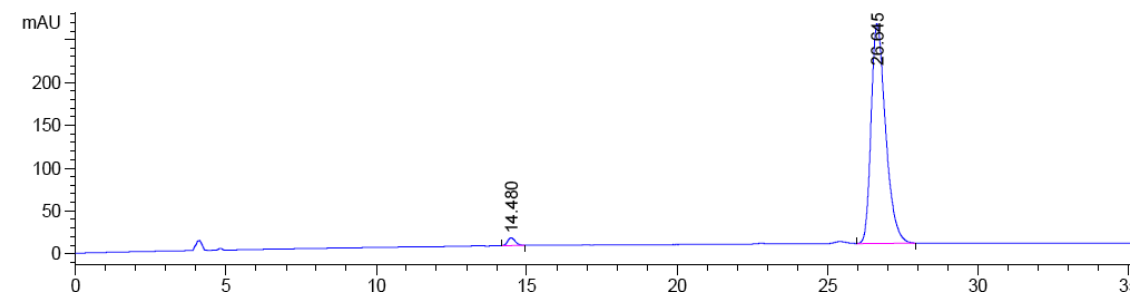

| Peak # | RetTime [min] | Type | Width [min] | Area [mAU*s] | Height [mAU] | Area %  |
|--------|---------------|------|-------------|--------------|--------------|---------|
| 1      | 14.481        | MM   | 0.3569      | 88.31874     | 4.12465      | 2.4299  |
| 2      | 26.645        | VB   | 0.5111      | 3546.35156   | 105.79105    | 97.5701 |

## 4.22 $^1\text{H}$ and $^{13}\text{C}$ -NMR spectra and HPLC traces of compound 4v

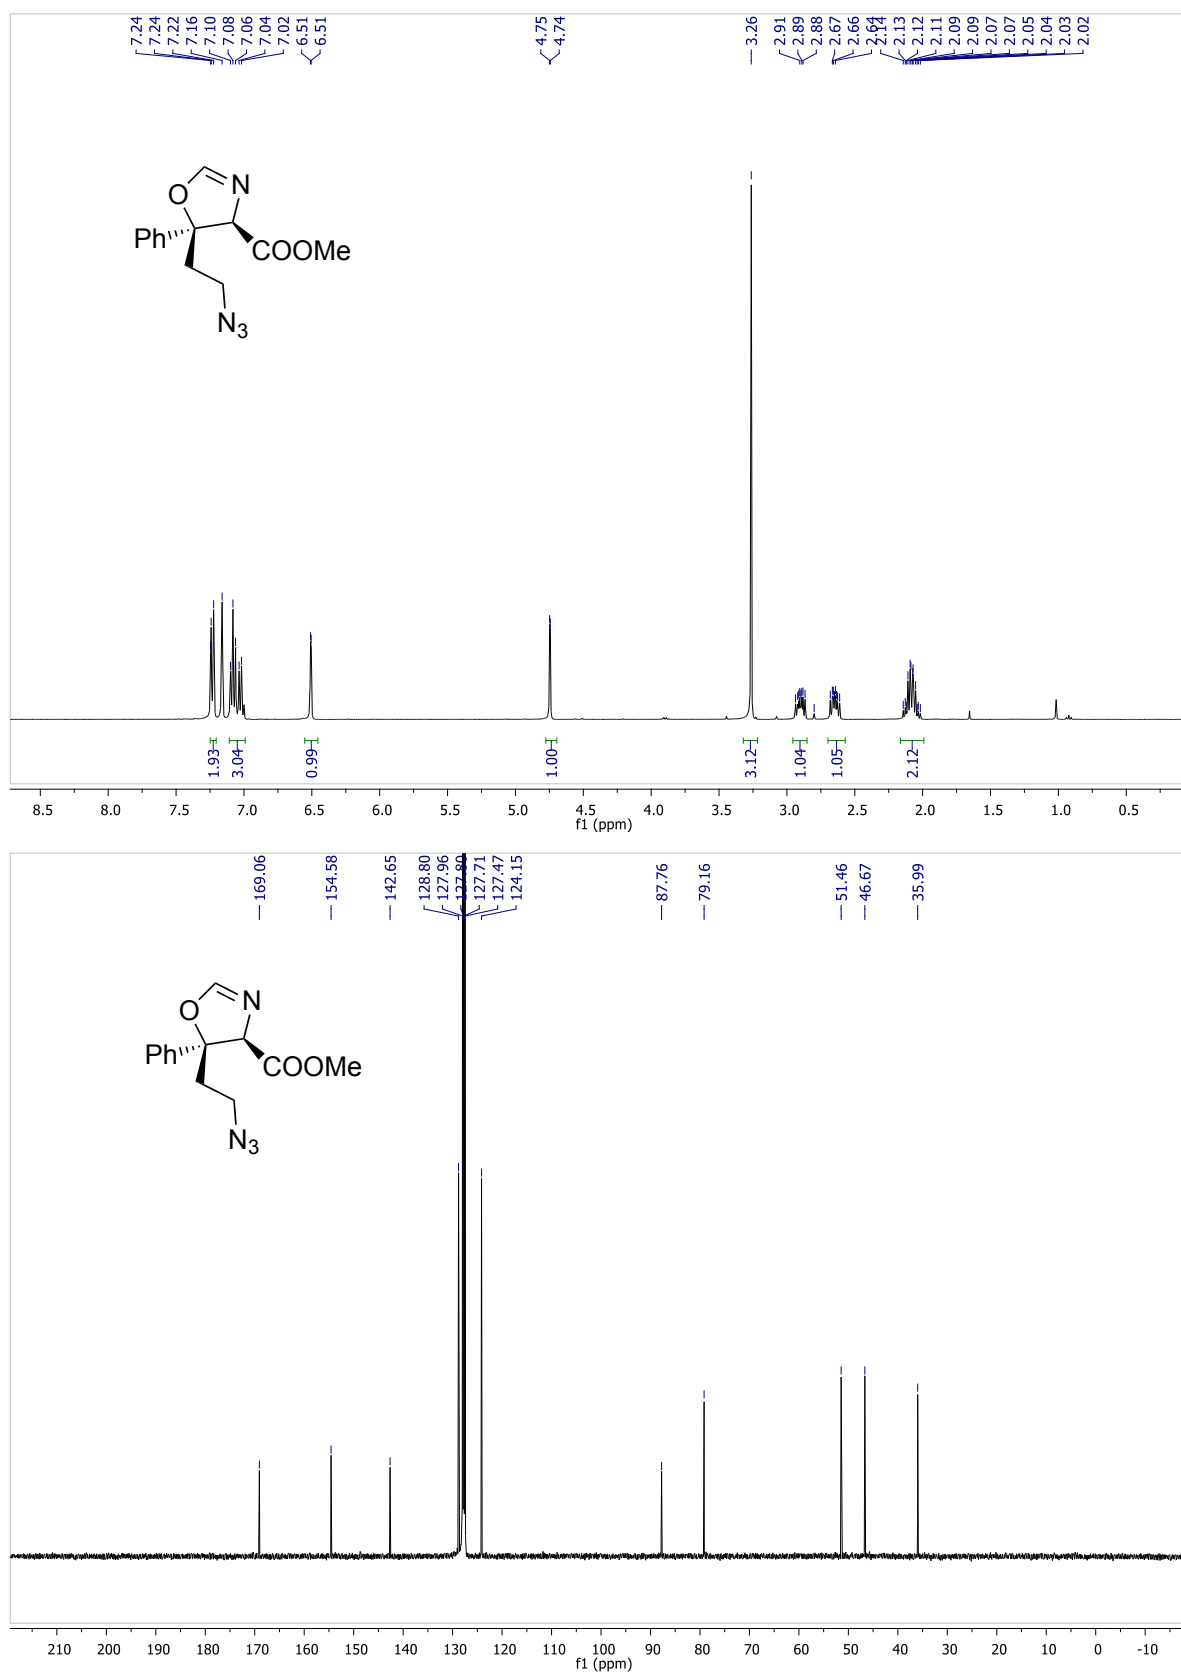



HPLC traces of of 4v

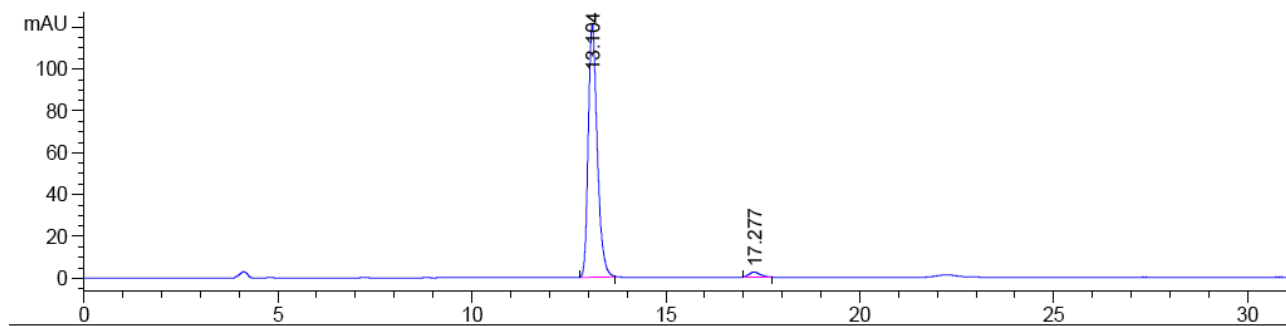

| Peak # | RetTime [min] | Type | Width [min] | Area [mAU*s] | Height [mAU] | Area %  |
|--------|---------------|------|-------------|--------------|--------------|---------|
| 1      | 13.104        | BB   | 0.2448      | 1946.58569   | 120.91148    | 97.3868 |
| 2      | 17.277        | BB   | 0.2977      | 52.23353     | 2.52107      | 2.6132  |

HPLC traces of the enantiomer of 4v

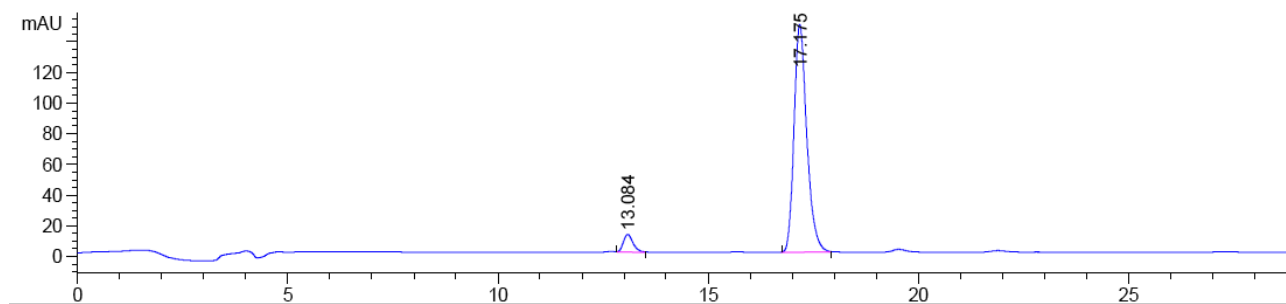

| Peak # | RetTime [min] | Type | Width [min] | Area [mAU*s] | Height [mAU] | Area %  |
|--------|---------------|------|-------------|--------------|--------------|---------|
| 1      | 13.084        | BB   | 0.2410      | 180.05991    | 11.41935     | 5.4079  |
| 2      | 17.175        | BB   | 0.3230      | 3149.48975   | 148.73798    | 94.5921 |

HPLC traces of mixture of both enantiomers

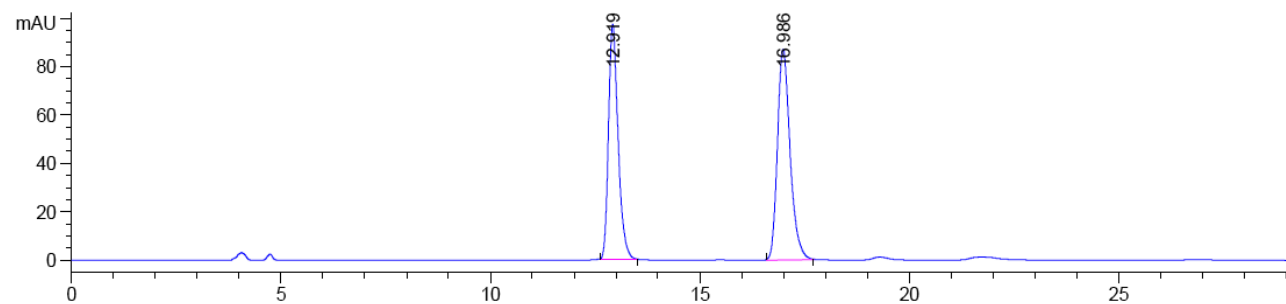

| Peak # | RetTime [min] | Type | Width [min] | Area [mAU*s] | Height [mAU] | Area %  |
|--------|---------------|------|-------------|--------------|--------------|---------|
| 1      | 12.921        | BB   | 0.2330      | 64.08192     | 4.22376      | 44.4948 |
| 2      | 16.982        | BB   | 0.2893      | 79.93909     | 3.91295      | 55.5052 |

### 4.23 $^1\text{H}$ and $^{13}\text{C}$ -NMR spectra and HPLC traces of compound 5a

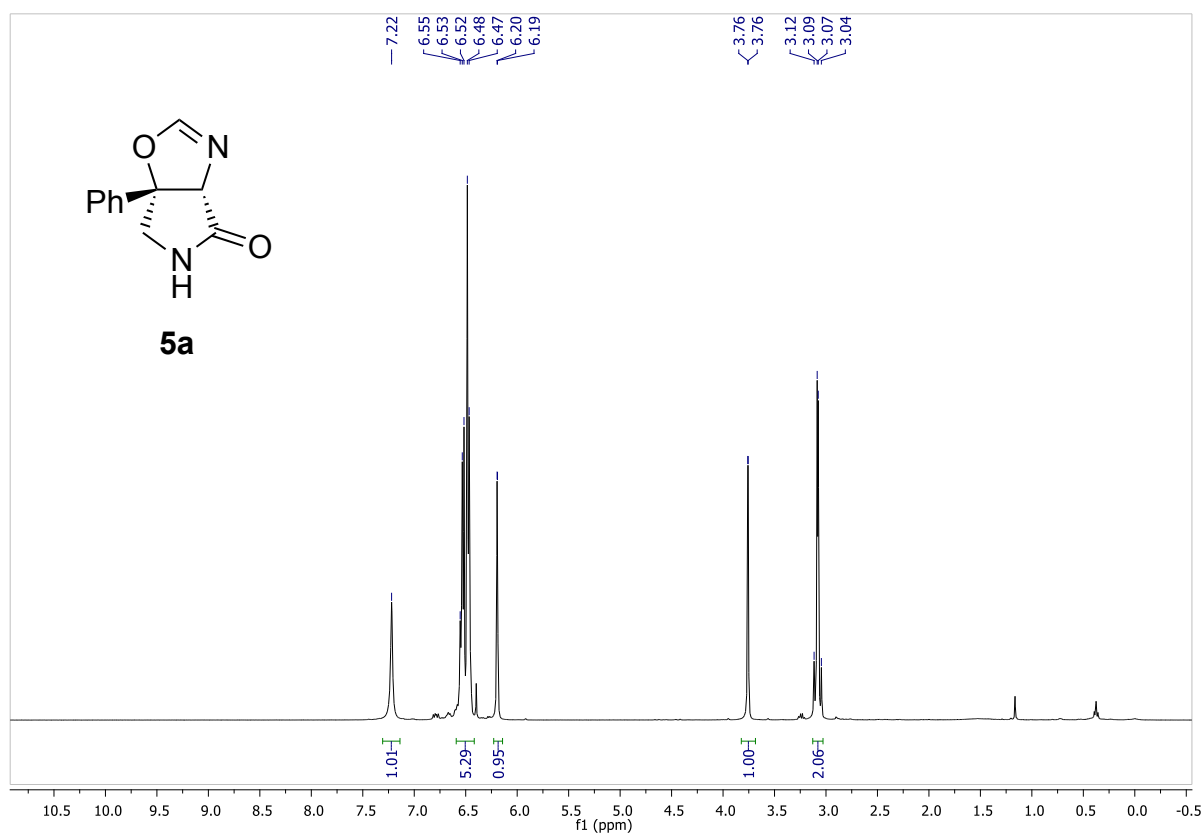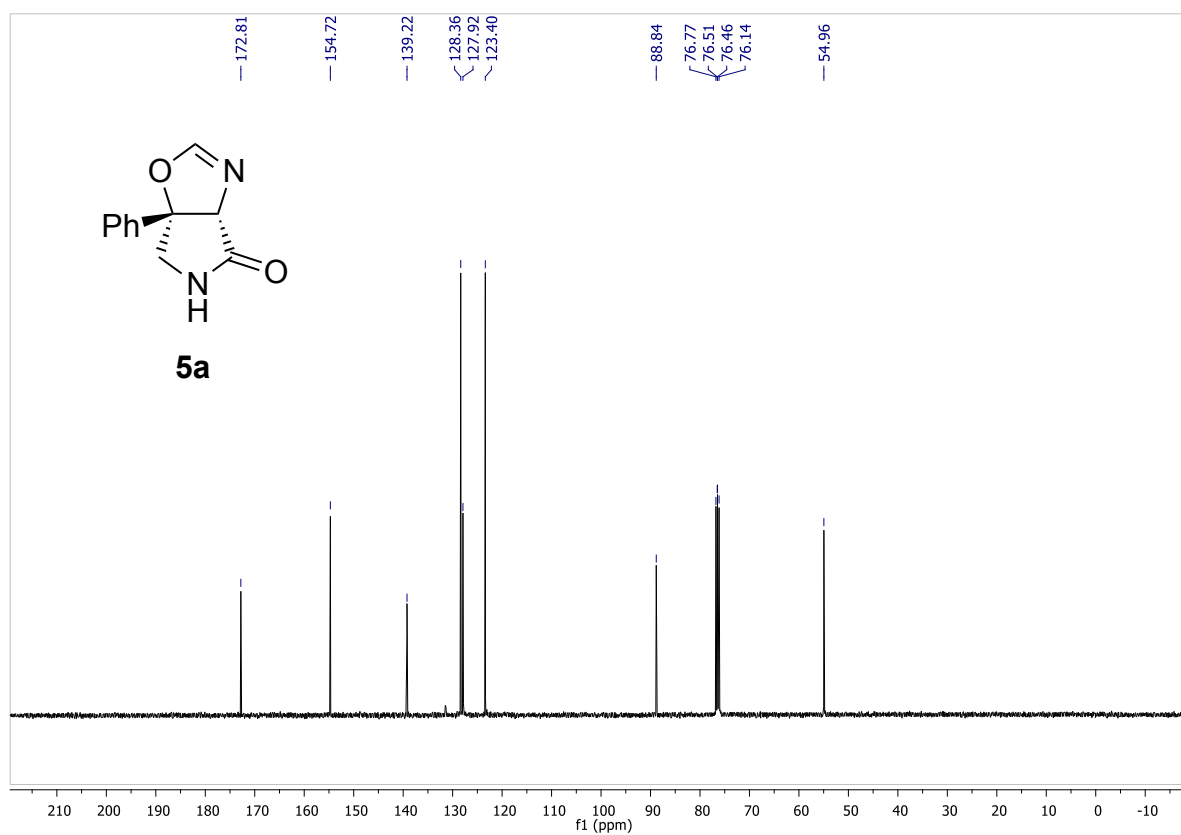

HPLC traces of of **5a**

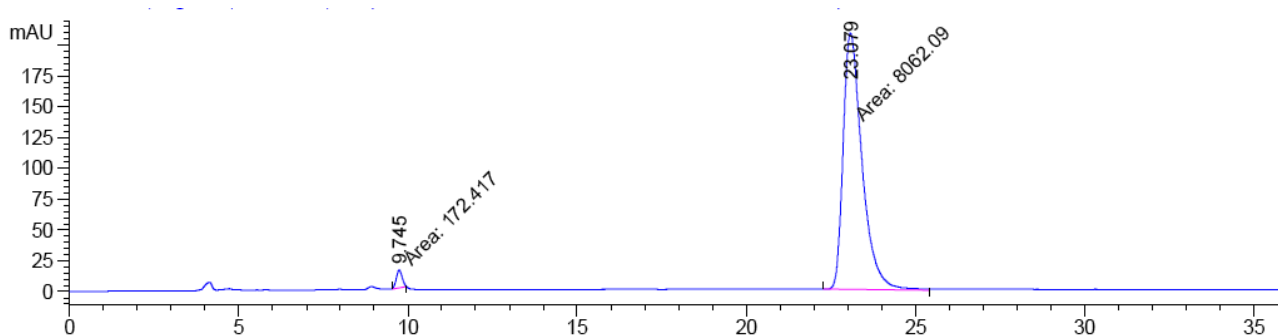

| Peak # | RetTime [min] | Type | Width [min] | Area [mAU*s] | Height [mAU] | Area %  |
|--------|---------------|------|-------------|--------------|--------------|---------|
| 1      | 9.745         | MM   | 0.1979      | 172.41728    | 14.52189     | 2.0938  |
| 2      | 23.079        | MM   | 0.6471      | 8062.09473   | 207.65614    | 97.9062 |

HPLC traces of the enantiomer of **5a**

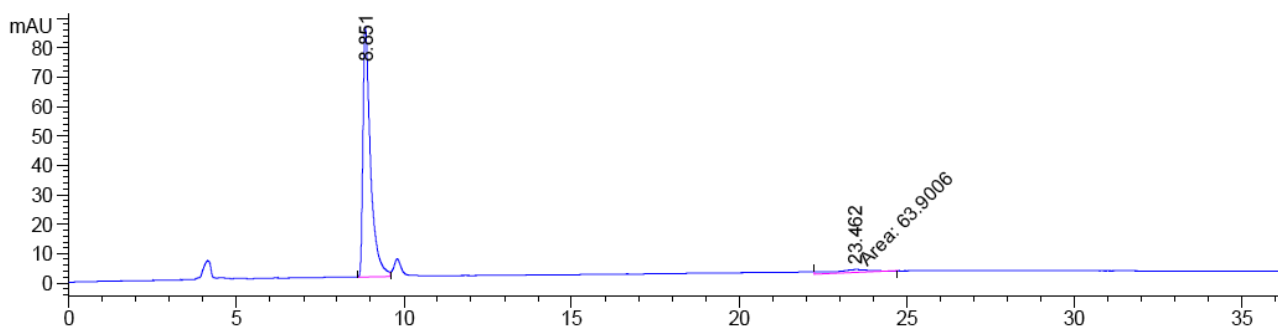

| Peak # | RetTime [min] | Type | Width [min] | Area [mAU*s] | Height [mAU] | Area %  |
|--------|---------------|------|-------------|--------------|--------------|---------|
| 1      | 8.851         | BB   | 0.2300      | 1342.28809   | 85.10344     | 95.4558 |
| 2      | 23.462        | MM   | 1.2407      | 63.90058     | 8.58413e-1   | 4.5442  |

HPLC traces of mixture of both enantiomers

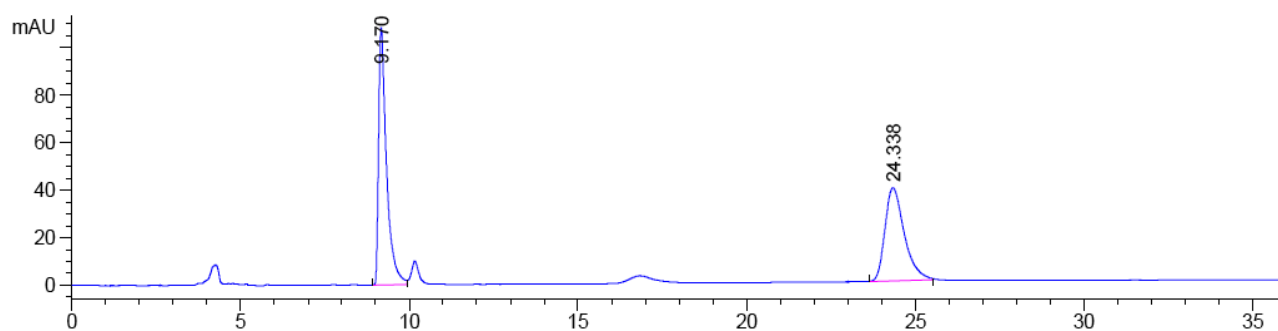

| Peak # | RetTime [min] | Type | Width [min] | Area [mAU*s] | Height [mAU] | Area %  |
|--------|---------------|------|-------------|--------------|--------------|---------|
| 1      | 9.170         | BV   | 0.2402      | 1761.40356   | 108.06648    | 52.9967 |
| 2      | 24.338        | BB   | 0.6045      | 1562.20630   | 39.23745     | 47.0033 |

#### 4.24 $^1\text{H}$ and $^{13}\text{C}$ -NMR spectra and HPLC traces of compound 5b

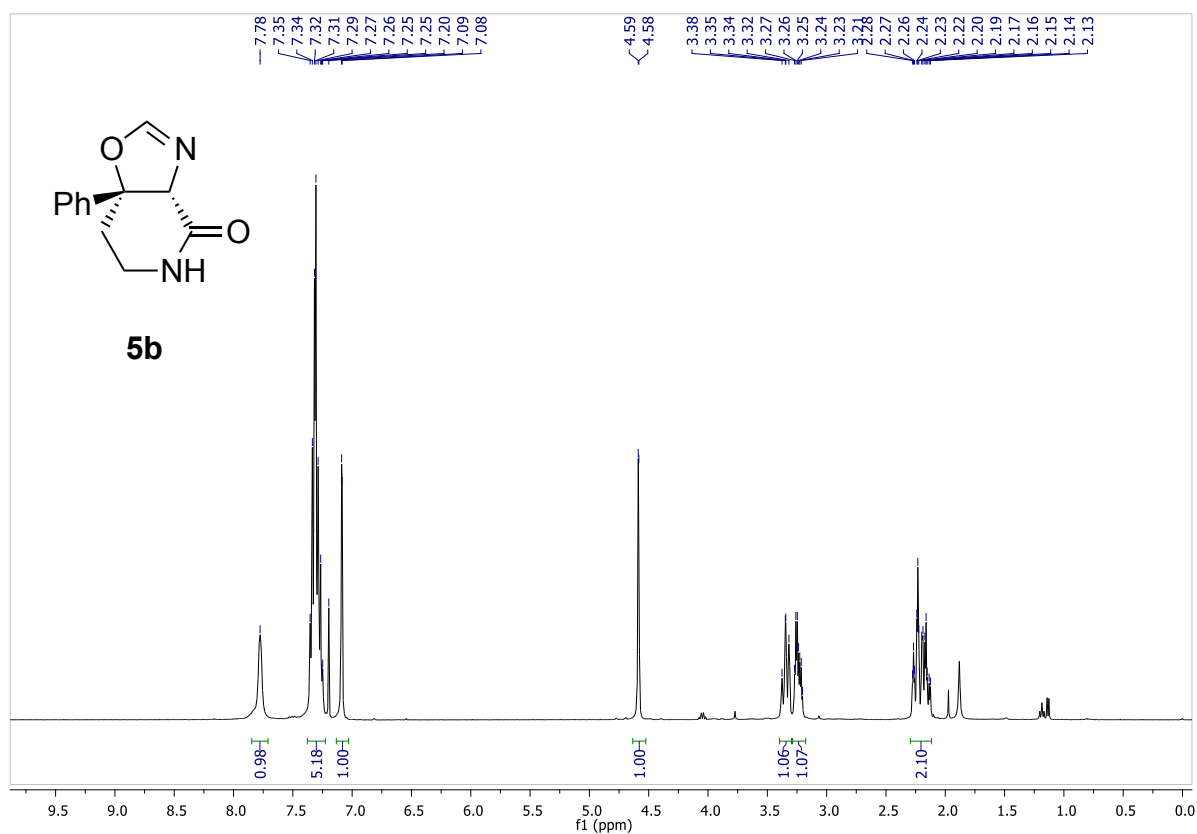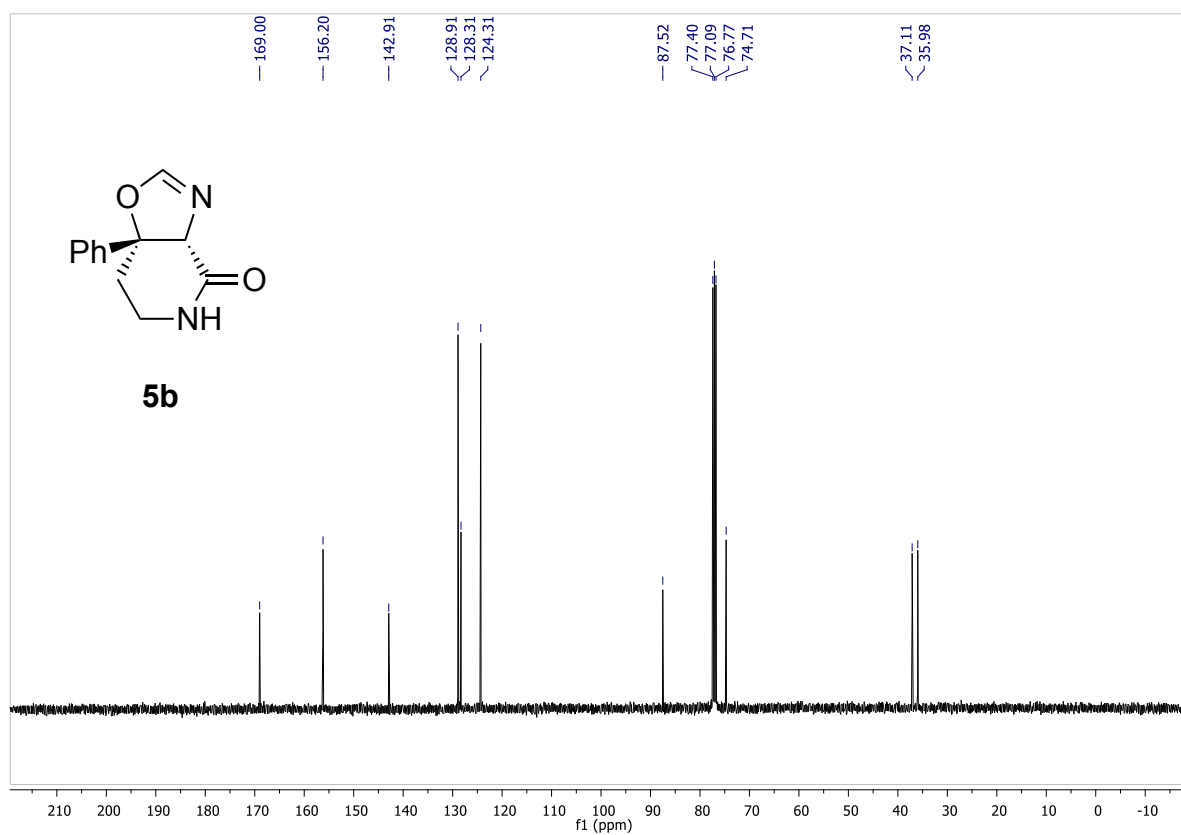

HPLC traces of of **5b**

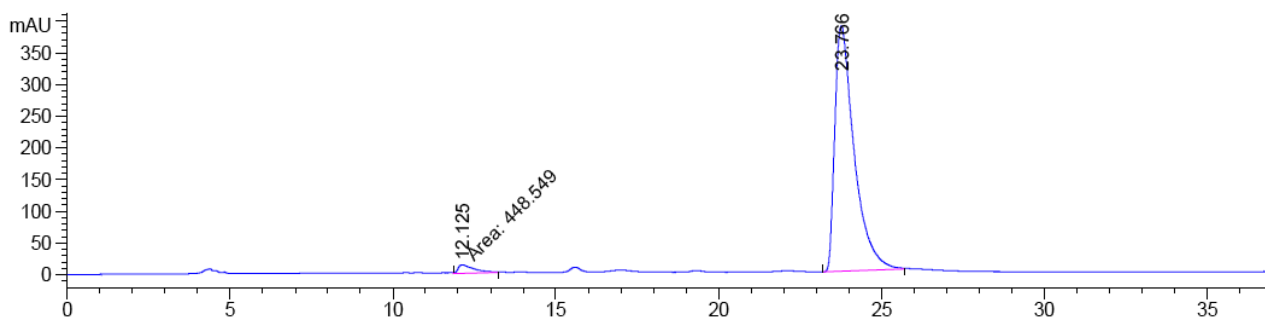

| Peak # | RetTime [min] | Type | Width [min] | Area [mAU*s] | Height [mAU] | Area %  |
|--------|---------------|------|-------------|--------------|--------------|---------|
| 1      | 12.125        | MM   | 0.5608      | 448.54941    | 13.33134     | 2.7296  |
| 2      | 23.766        | BB   | 0.6087      | 1.59843e4    | 386.36707    | 97.2704 |

HPLC traces of the enantiomer of **5b**

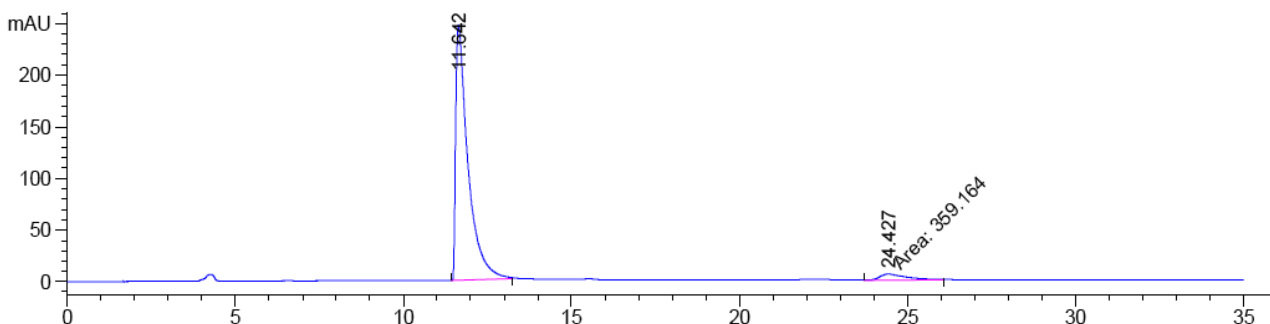

| Peak # | RetTime [min] | Type | Width [min] | Area [mAU*s] | Height [mAU] | Area %  |
|--------|---------------|------|-------------|--------------|--------------|---------|
| 1      | 11.642        | BB   | 0.3644      | 6287.49805   | 247.49672    | 94.5963 |
| 2      | 24.427        | MM   | 0.9756      | 359.16354    | 6.13607      | 5.4037  |

HPLC traces of mixture of both enantiomers

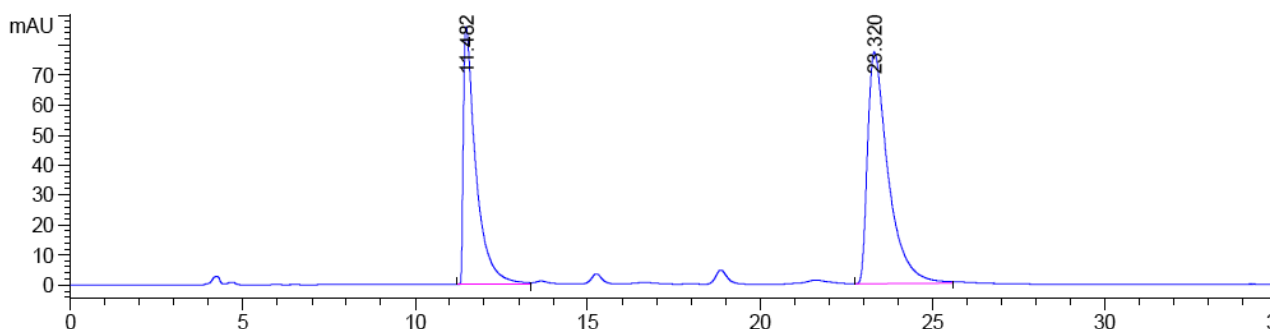

| Peak # | RetTime [min] | Type | Width [min] | Area [mAU*s] | Height [mAU] | Area %  |
|--------|---------------|------|-------------|--------------|--------------|---------|
| 1      | 11.482        | BV   | 0.3609      | 2184.88403   | 85.86687     | 40.4288 |
| 2      | 23.320        | VB   | 0.6183      | 3219.39160   | 77.23882     | 59.5712 |

## 4.25 $^1\text{H}$ and $^{13}\text{C}$ -NMR spectra and HPLC traces of compound 6

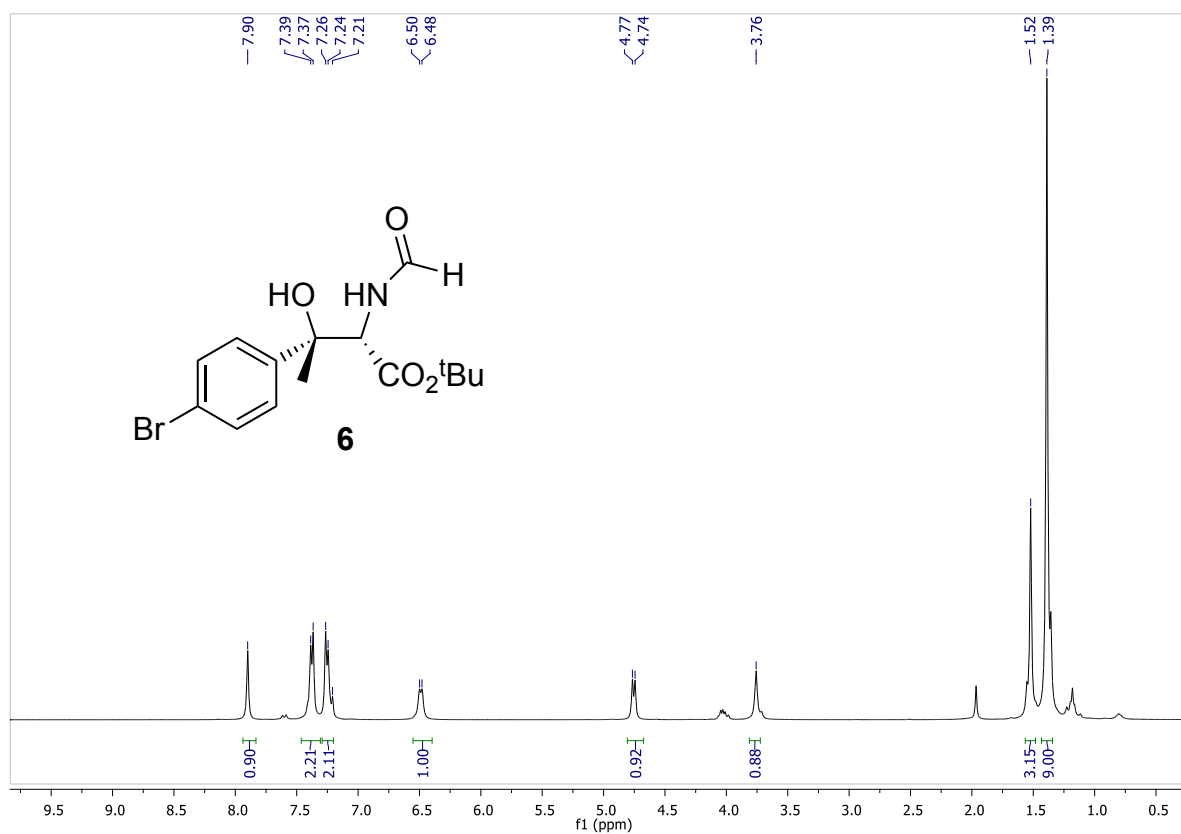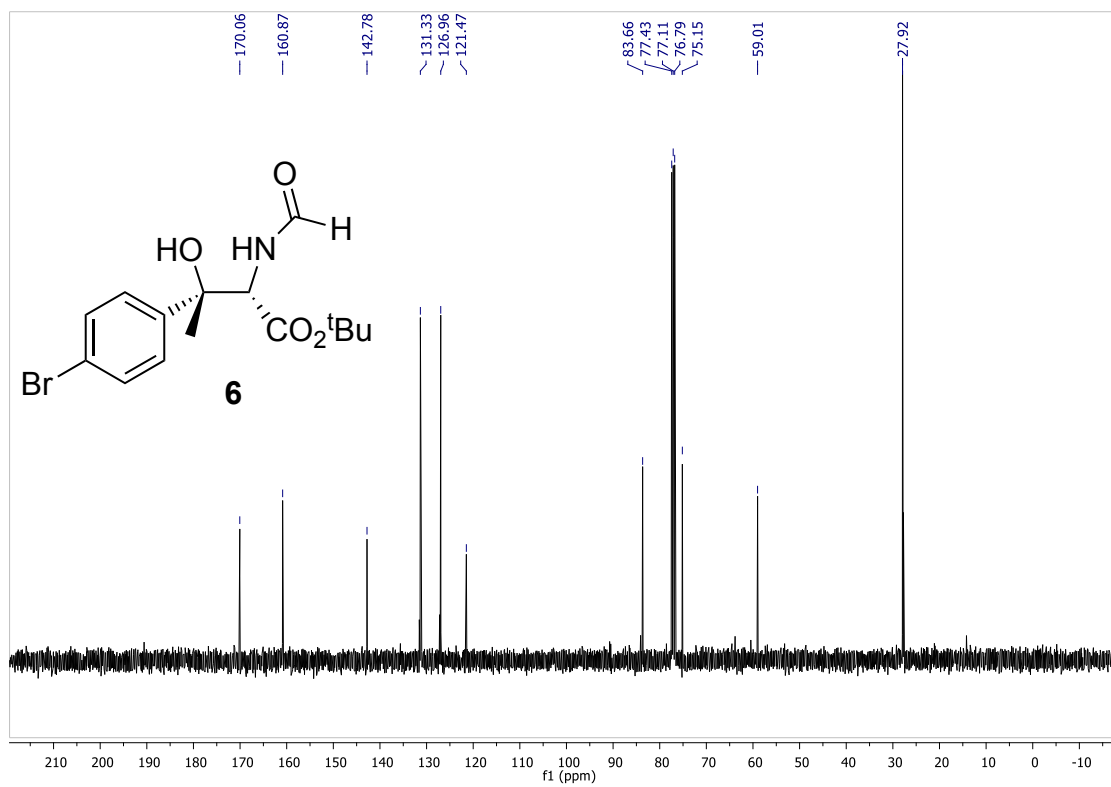

HPLC traces of racemic compound

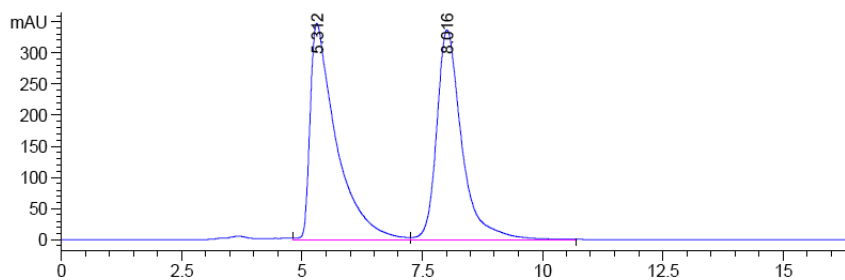

| Peak # | RetTime [min] | Type | Width [min] | Area [mAU*s] | Height [mAU] | Area %  |
|--------|---------------|------|-------------|--------------|--------------|---------|
| 1      | 5.312         | VV   | 0.5193      | 1.30780e4    | 347.28494    | 51.7679 |
| 2      | 8.016         | VB   | 0.5383      | 1.21848e4    | 336.59964    | 48.2321 |

HPLC traces of 6

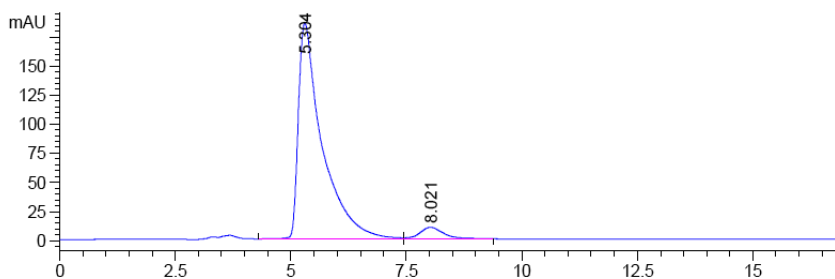

| Peak # | RetTime [min] | Type | Width [min] | Area [mAU*s] | Height [mAU] | Area %  |
|--------|---------------|------|-------------|--------------|--------------|---------|
| 1      | 5.304         | VV   | 0.5088      | 6702.44043   | 185.81700    | 94.6211 |
| 2      | 8.021         | VB   | 0.5571      | 381.01132    | 10.17069     | 5.3789  |

## 4.26 $^1\text{H}$ and $^{13}\text{C}$ -NMR spectra and HPLC traces of compound 7

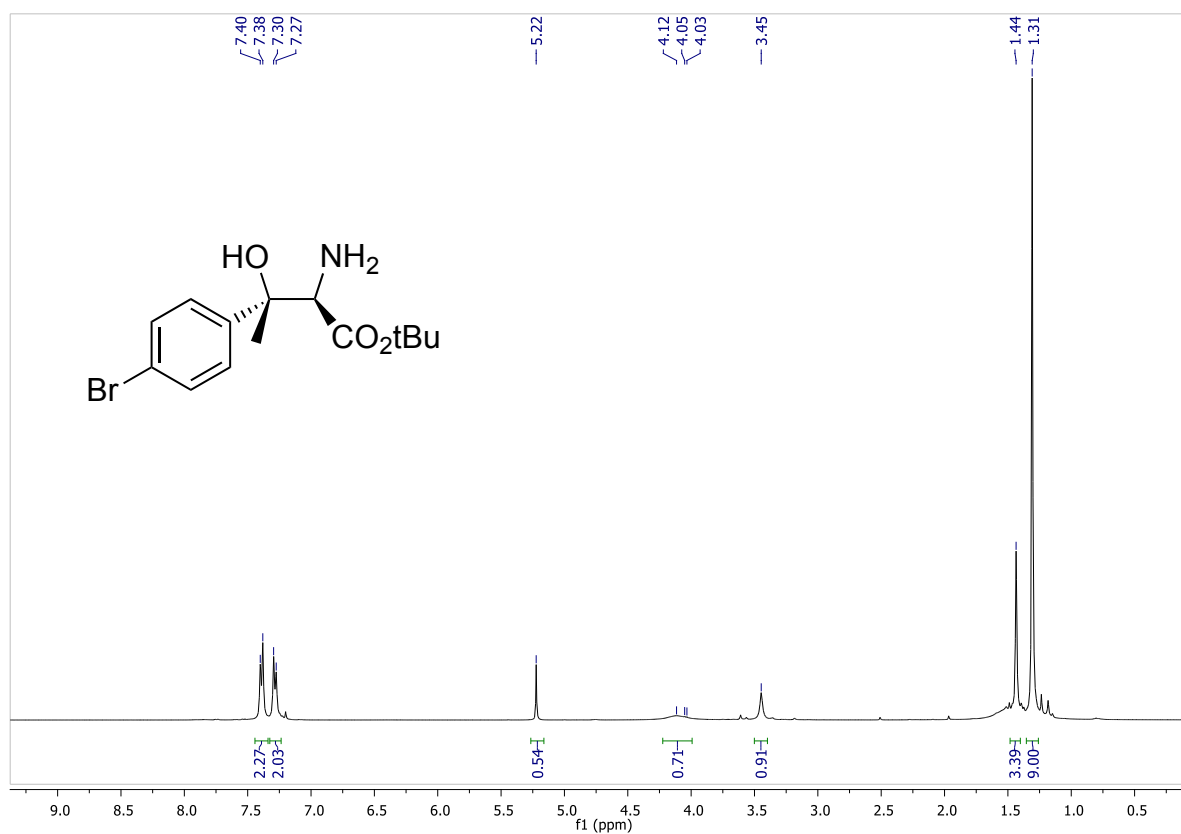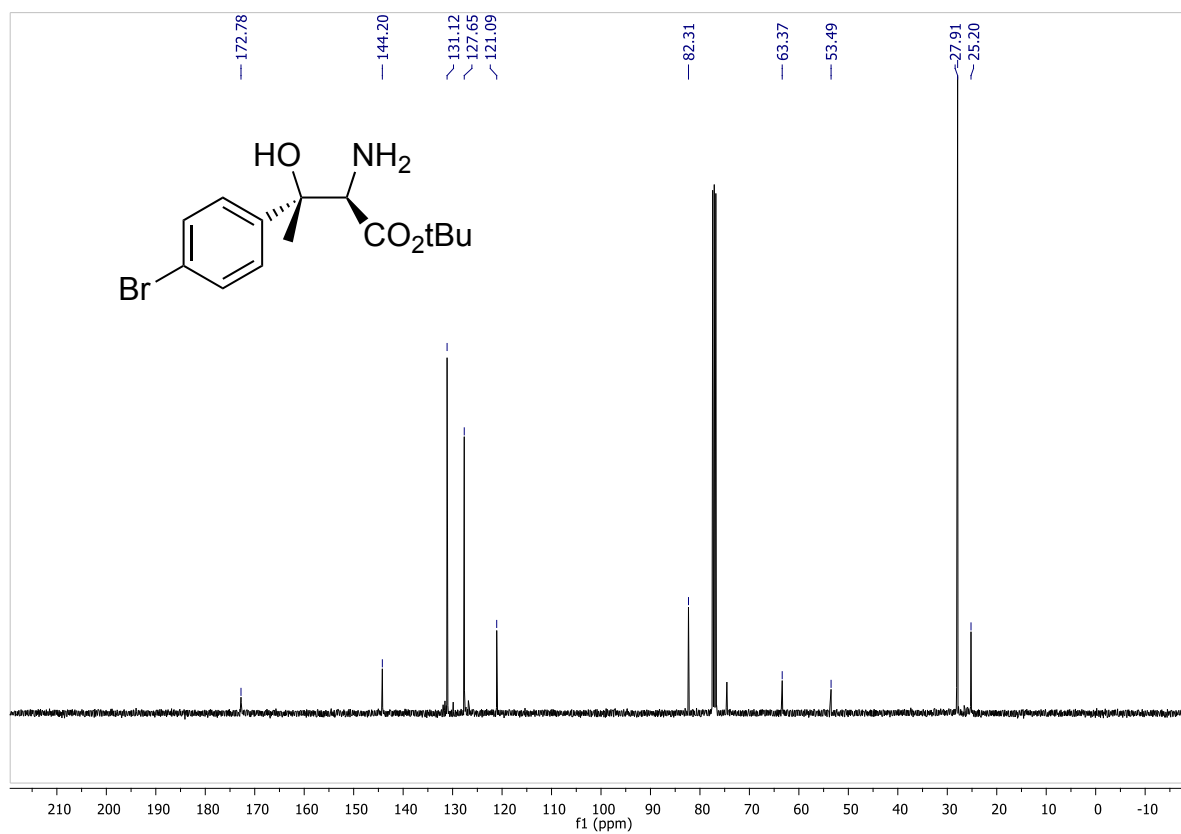



### 4.27 $^1\text{H}$ and $^{13}\text{C}$ -NMR spectra and HPLC traces of compound **8**

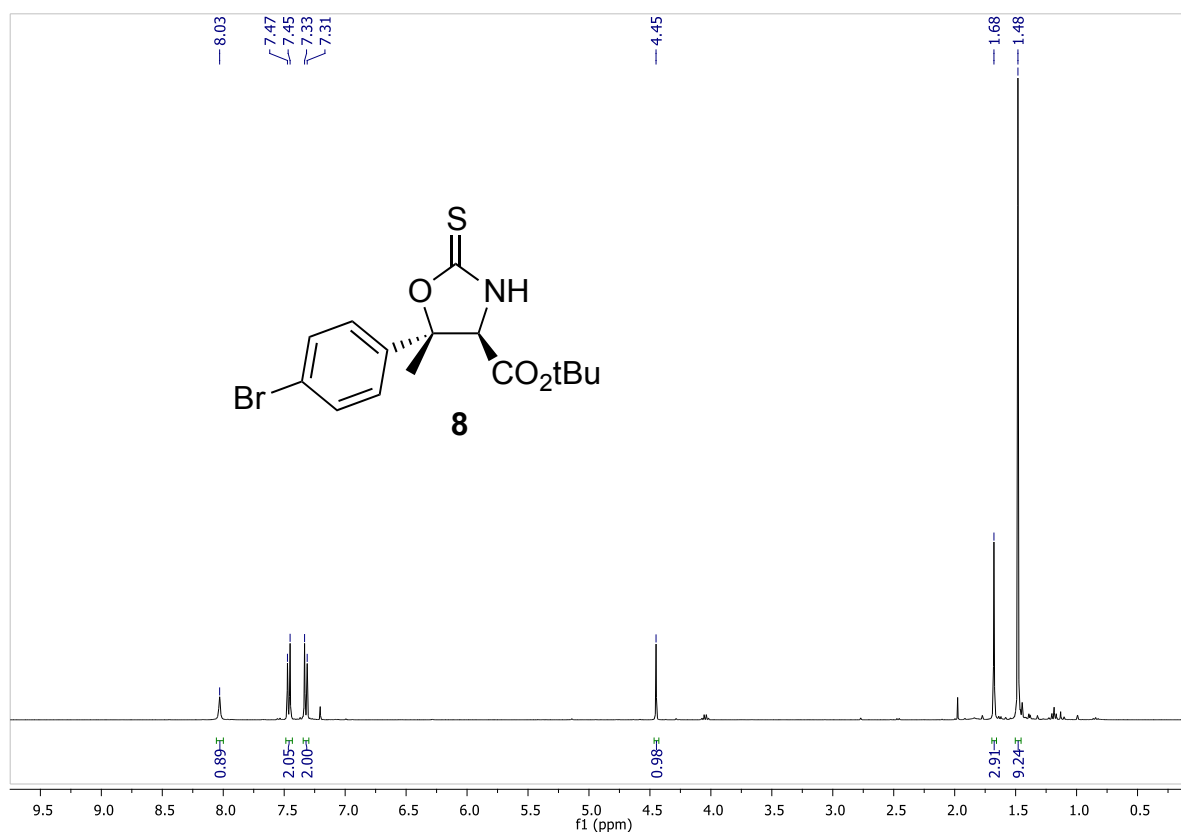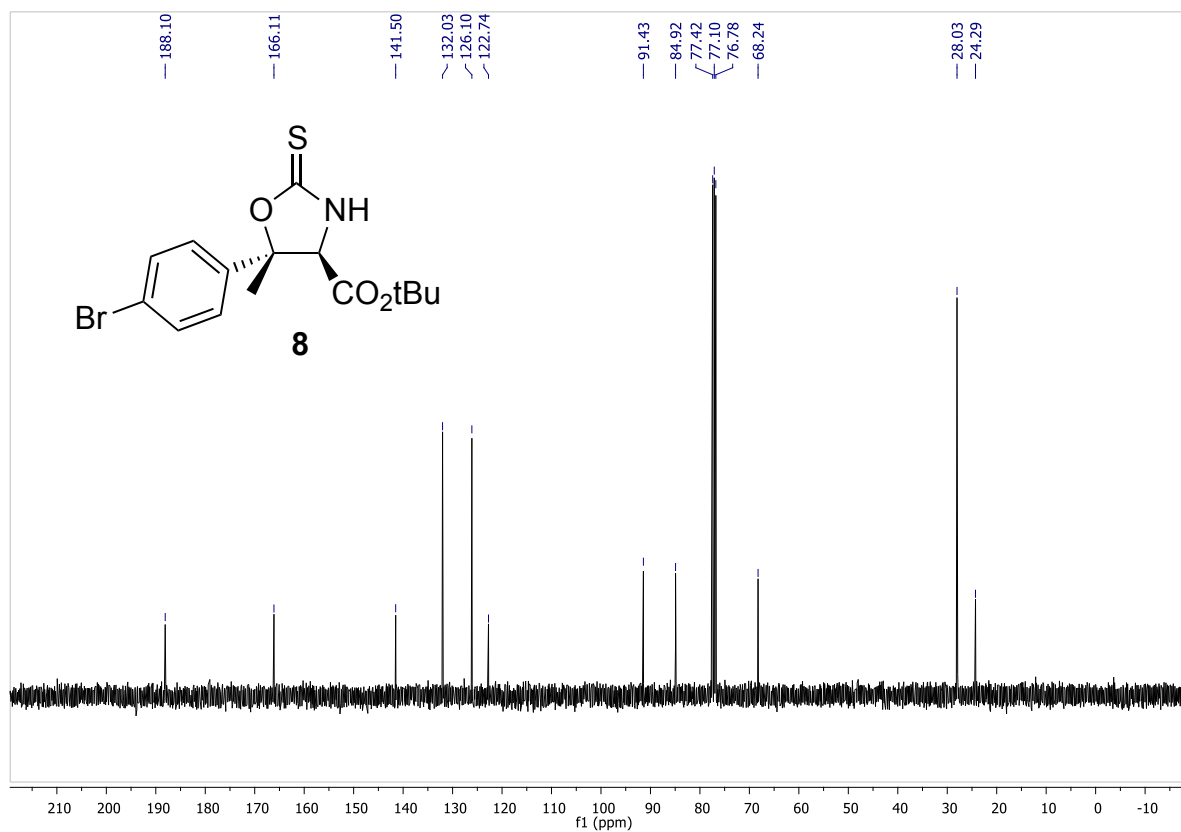

HPLC traces of racemic compound

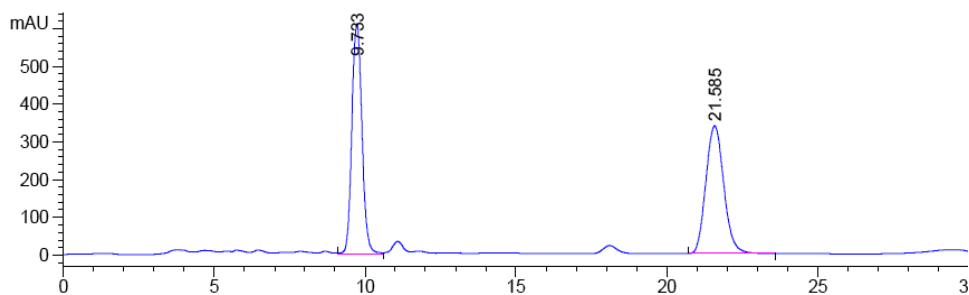

| Peak # | RetTime [min] | Type | Width [min] | Area [mAU*s] | Height [mAU] | Area %  |
|--------|---------------|------|-------------|--------------|--------------|---------|
| 1      | 9.733         | VV   | 0.3728      | 1.42701e4    | 610.20959    | 50.3676 |
| 2      | 21.585        | BB   | 0.6522      | 1.40618e4    | 338.82504    | 49.6324 |

Before recrystallization

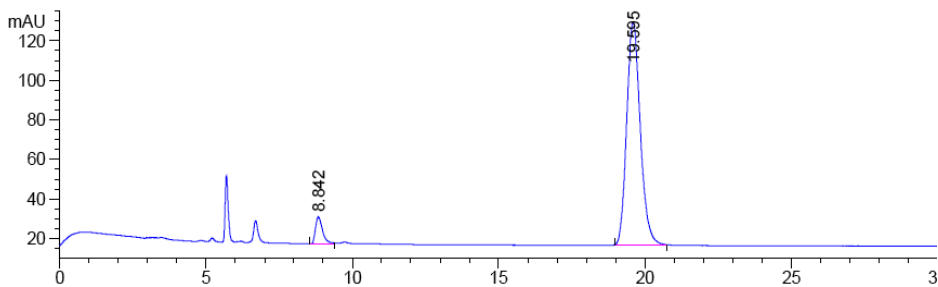

| Peak # | RetTime [min] | Type | Width [min] | Area [mAU*s] | Height [mAU] | Area %  |
|--------|---------------|------|-------------|--------------|--------------|---------|
| 1      | 8.842         | BB   | 0.2564      | 221.97612    | 13.46174     | 5.7443  |
| 2      | 19.595        | BB   | 0.5008      | 3642.29297   | 112.76889    | 94.2557 |

After recrystallization

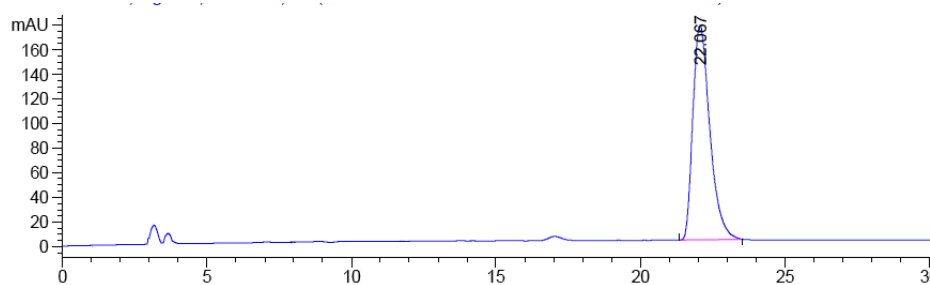

| Peak # | RetTime [min] | Type | Width [min] | Area [mAU*s] | Height [mAU] | Area %   |
|--------|---------------|------|-------------|--------------|--------------|----------|
| 1      | 22.067        | BB   | 0.6358      | 7138.50342   | 174.28699    | 100.0000 |

## 5. X-Ray data of compound 8

Low temperature single X-ray diffraction data were collected for **8** using a Nonius KCCD diffractometer. Data were reduced using DENZO-SMN<sup>5</sup> and solved using SIR92.<sup>6</sup> Structures were refined using CRYSTALS<sup>7</sup>. For **8**, the Flack x parameter<sup>8</sup> refined to 0.015(5). Full crystallographic data (in CIF format) is available as ESI and has been deposited with the Cambridge Crystallographic Data Centre (reference code **CCDC 1036558**).

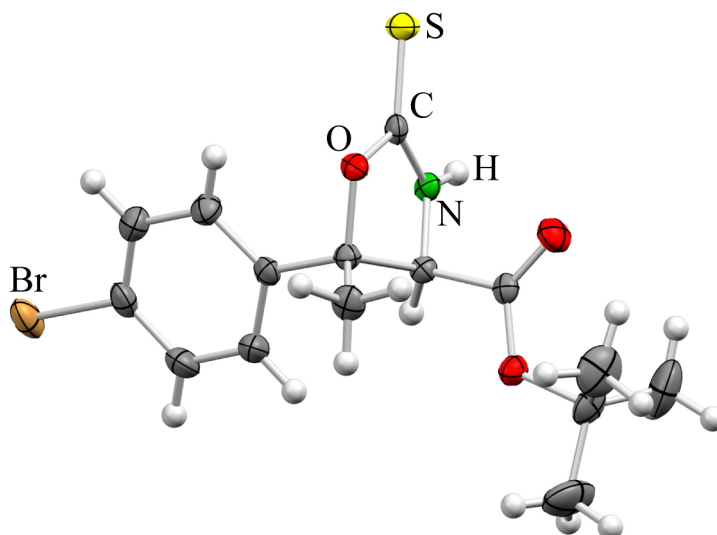

**Figure S1.** XRD molecular structure of compound **8** (thermal ellipsoids set at 60 % probability).

## 6. <sup>1</sup>H-NMR and <sup>13</sup>C-NMR spectra and HPLC traces of compound 4x, 4y and 4z.

### 6.1 Synthesis and characterization of *tert*-butyl 5,5-diethyl-4,5-dihydrooxazole-4-carboxylate

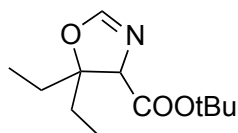

**4x.** The general procedure was followed. The desired product was obtained as a colorless oil in 32% yield (25 mg); The er was determined by HPLC using a Chiralpack OD-H [hexane/iso-propanol 90:10,  $\lambda$  220, 1 mL/min] t (minor) = 4.48 min., t (major) = 5.35 min. (61:39).  $[\alpha]_D^{20} = +4.96$  (*c* 0.5, CHCl<sub>3</sub>); <sup>1</sup>H

<sup>5</sup> Otwinowski & Minor, Processing of X-ray Diffraction Data Collected in Oscillation Mode, *Methods Enzymol.* **1997**, 276, Eds C. W. Carter, R. M. Sweet, Academic Press.

<sup>6</sup> A. Altomare, G. Cascarano, C. Giacovazzo, A. Guagliardi, M. C. Burla, G. Polidori & M. Camalli, *J. Appl. Cryst.* **1994**, 27, 435

<sup>7</sup> P. W. Betteridge, J. R. Carruthers, R. I. Cooper, K. Prout, & D. J. Watkin, *J. Appl. Cryst.* **2003**, 36, 1487. b) R. I. Cooper, A. L. Thompson & D. J. Watkin, *J. Appl. Cryst.* **2010**, 43, 1100-1107

<sup>8</sup> a) H. D. Flack, *Acta Cryst.* **1983**, A39, 876-881. b) H. D. Flack & G. Bernardinelli, *J. Appl. Cryst.* **2000**, 33, 1143-1148.

NMR (400 MHz, C<sub>6</sub>D<sub>6</sub>)  $\delta$  0.69 (t,  $J$  = 7.5 Hz, 3H), 0.84 (t,  $J$  = 7.5 Hz, 3H), 1.31 (s, 9H), 1.37-1.58 (m, 2H), 1.60-1.71 (m, 1H), 1.74-1.88 (m, 1H), 4.37 (d,  $J$  = 2.0 Hz, 1H), 6.51 (d,  $J$  = 2.0 Hz, 1H); <sup>13</sup>C NMR (100 MHz, C<sub>6</sub>D<sub>6</sub>)  $\delta$  6.9 (CH<sub>3</sub>), 7.9 (CH<sub>3</sub>), 25.9 (CH<sub>2</sub>), 27.5 (3xCH<sub>3</sub>), 30.0 (CH<sub>2</sub>), 74.7 (CH), 80.7 (C), 89.5 (C), 155.0 (CH), 168.6 (C); IR  $\nu_{\max}/\text{cm}^{-1}$  1730, 1668, 1369, 1155; HRMS (ES) calcd C<sub>12</sub>H<sub>21</sub>NO<sub>3</sub> (M<sup>+</sup>) 227.1521, found 227.1527.

### 6.2 Synthesis and characterization of *tert*-butyl 5,5-dimethyl-4,5-dihydrooxazole-4-carboxylate

**4y.** The general procedure was followed. The desired product was obtained as a colorless oil in 40% yield (28 mg); The er was determined by HPLC using a Chiralpack OD-H [hexane/iso-propanol 90:10,  $\lambda$  220, 1 mL/min] t (minor) = 4.89 min., t (major) = 6.12 min. (47:53).  $[\alpha]_{\text{D}}^{20}$  = +12.0 ( $c$  0.5, CHCl<sub>3</sub>); <sup>1</sup>H NMR (400 MHz, C<sub>6</sub>D<sub>6</sub>)  $\delta$  1.12 (s, 3H), 1.25 (s, 3H), 1.29 (s, 9H), 4.24 (d,  $J$  = 2.0 Hz, 1H), 6.50 (d,  $J$  = 2.0 Hz, 1H); <sup>13</sup>C NMR (100 MHz, C<sub>6</sub>D<sub>6</sub>)  $\delta$  22.3 (CH<sub>3</sub>), 27.5 (3xCH<sub>3</sub>), 28.3 (CH<sub>3</sub>), 76.7 (CH), 80.8 (C), 84.2 (C), 155.1 (CH), 168.4 (C); IR  $\nu_{\max}/\text{cm}^{-1}$  1738, 1368, 1216, 1104; HRMS (ES) calcd C<sub>10</sub>H<sub>17</sub>NNaO<sub>3</sub> (M+Na<sup>+</sup>) 222.1101, found 222.1103.

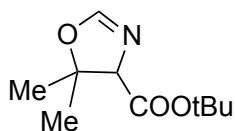

### 6.3 Synthesis and characterization of (4*R*,5*S*)-*tert*-butyl 5-cyclohexyl-5-methyl-4,5-dihydrooxazole-4-carboxylate **4z**.

The general procedure was followed. The desired product was obtained as a colorless oil in 78% yield (70 mg, trans:cis=85:15; data for the trans diastereoisomer); The er was determined by HPLC using a Chiralpack AD-H [hexane/iso-propanol 95:5,  $\lambda$  220, 1 mL/min] t (minor) = 12.76 min., t (major) = 13.62 min. (67:33).  $[\alpha]_{\text{D}}^{20}$  = - 18.5 ( $c$  0.68, CHCl<sub>3</sub>); <sup>1</sup>H NMR (400 MHz, C<sub>6</sub>D<sub>6</sub>)  $\delta$  0.73-0.85 (m, 1H), 1.01-1.03 (m, 2H), 1.29 (s, 3H), 1.32 (s, 9H), 1.51-1.76 (m, 6H), 4.46 (d,  $J$  = 2.0 Hz, 1H), 6.53 (d,  $J$  = 2.0 Hz, 1H); <sup>13</sup>C NMR (100 MHz, C<sub>6</sub>D<sub>6</sub>)  $\delta$  18.4 (CH<sub>3</sub>), 26.1 (CH<sub>2</sub>), 26.2 (CH<sub>2</sub>), 26.4 (CH<sub>2</sub>), 26.6 (CH<sub>2</sub>), 27.6 (3xCH<sub>3</sub>), 47.7 (CH), 73.8 (CH), 80.6 (C), 89.0 (C), 154.8 (CH), 168.9 (C); HRMS (ES) calcd C<sub>15</sub>H<sub>26</sub>NO<sub>3</sub> [M+H]<sup>+</sup> 268.1907, found 268.1906.

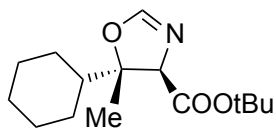

## 6.4 $^1\text{H}$ and $^{13}\text{C}$ -NMR spectra and HPLC traces of compound 4x

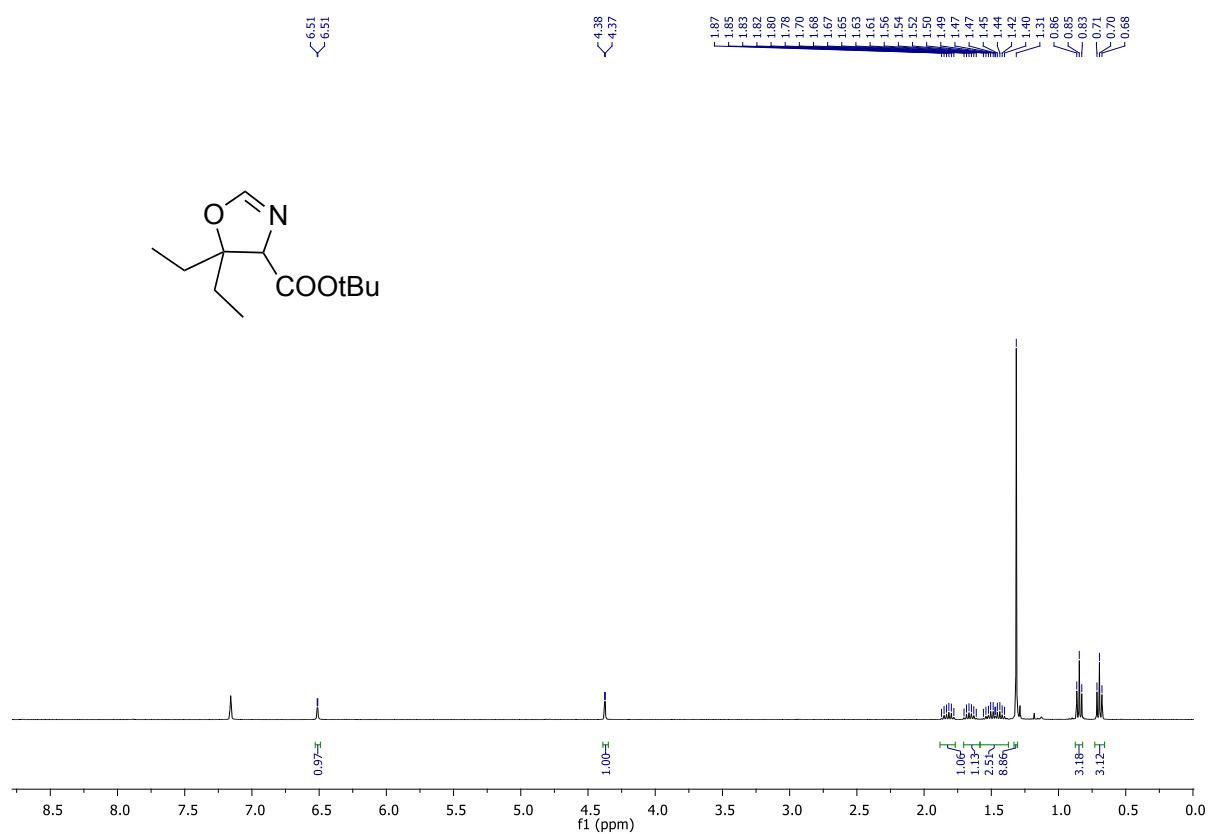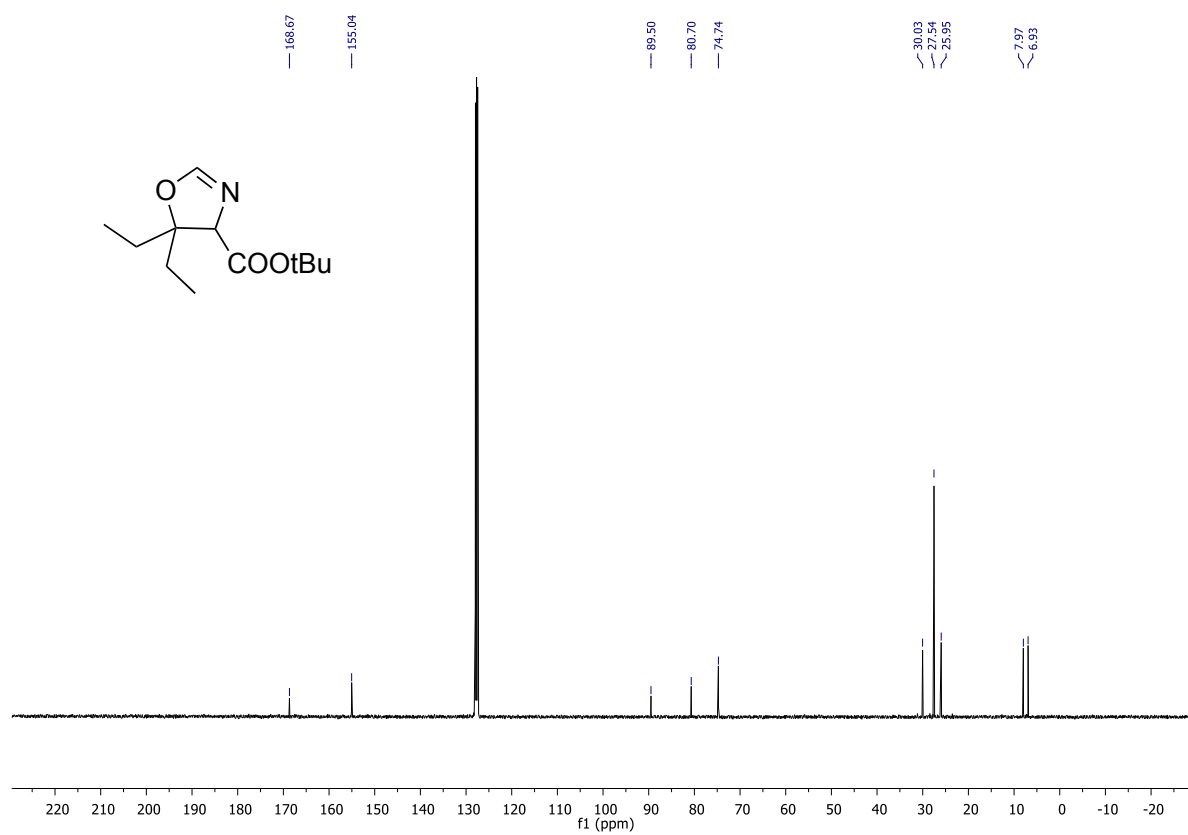

HPLC traces of racemic product

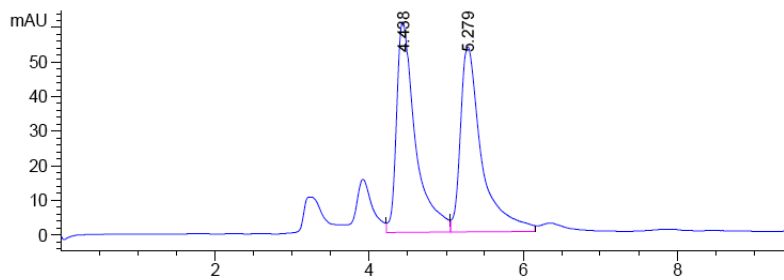

| Peak # | RetTime [min] | Type | Width [min] | Area [mAU*s] | Height [mAU] | Area %  |
|--------|---------------|------|-------------|--------------|--------------|---------|
| 1      | 4.438         | VV   | 0.2468      | 1028.21252   | 60.94788     | 50.3448 |
| 2      | 5.279         | VB   | 0.2766      | 1014.13007   | 53.62664     | 49.6552 |

HPLC traces of 4x

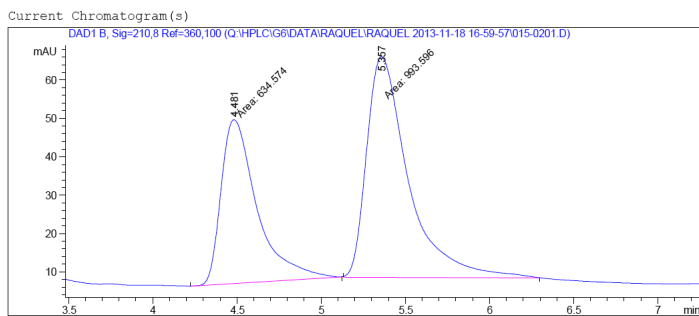

Signal 2: DAD1 B, Sig=210,8 Ref=360,100

| Peak # | RetTime [min] | Type | Width [min] | Area [mAU*s] | Height [mAU] | Area %  |
|--------|---------------|------|-------------|--------------|--------------|---------|
| 1      | 4.481         | MM   | 0.2473      | 634.57391    | 42.76239     | 38.9747 |
| 2      | 5.357         | MM   | 0.2879      | 993.59576    | 57.51864     | 61.0253 |

Totals : 1628.16968 100.28104

# 6.5 <sup>1</sup>H and <sup>13</sup>C-NMR spectra and HPLC traces of compound 4y

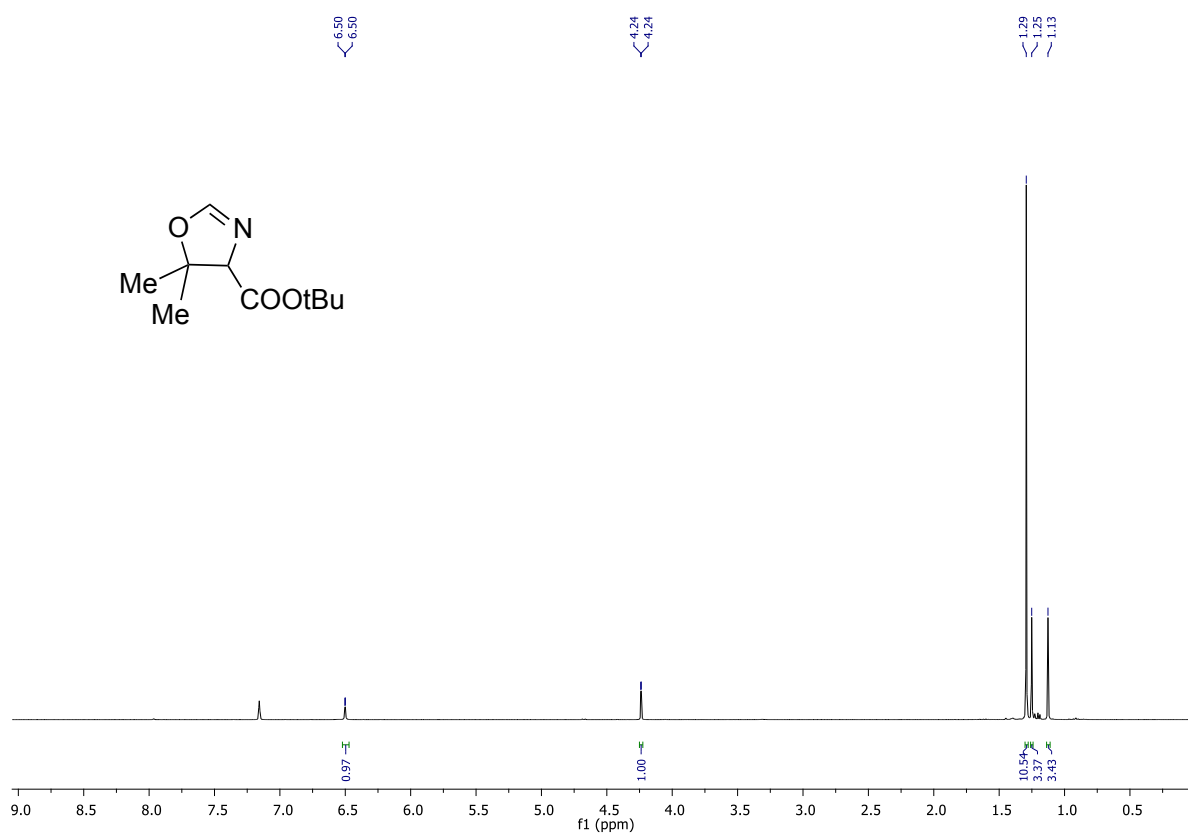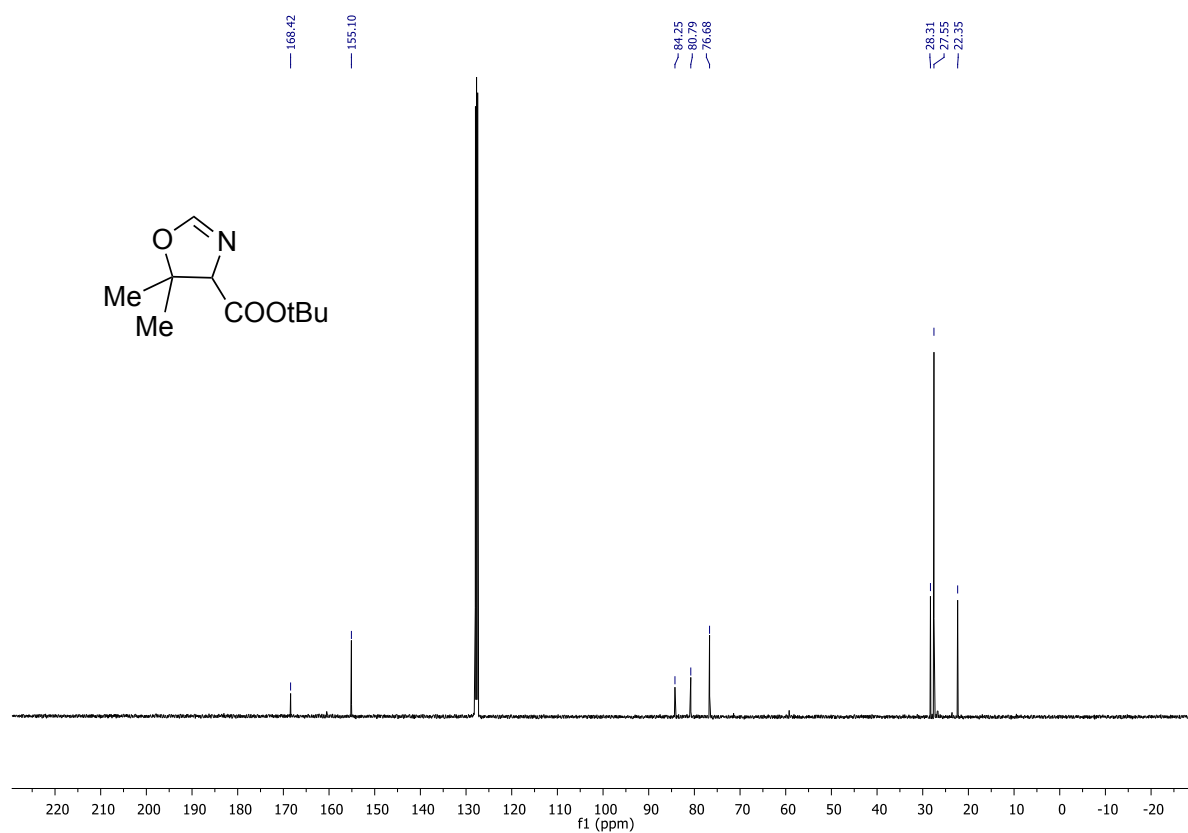

HPLC traces of racemic product

Current Chromatogram(s)

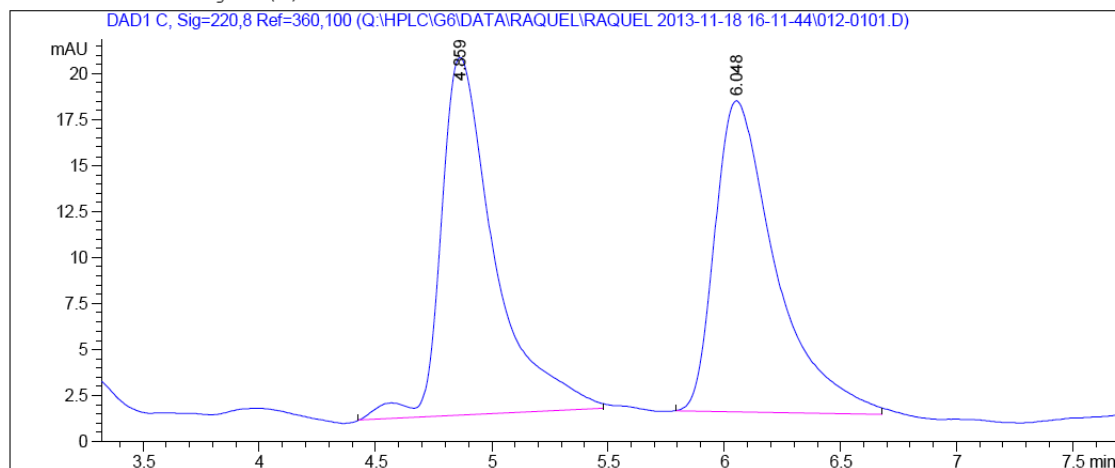

| Peak # | RetTime [min] | Type | Width [min] | Area [mAU*s] | Height [mAU] | Area %  |
|--------|---------------|------|-------------|--------------|--------------|---------|
| 1      | 4.859         | BB   | 0.2372      | 312.04694    | 19.45072     | 50.4168 |
| 2      | 6.048         | BB   | 0.2698      | 306.88721    | 16.90664     | 49.5832 |

Totals : 618.93414 36.35736

HPLC traces of 4y

Current Chromatogram(s)

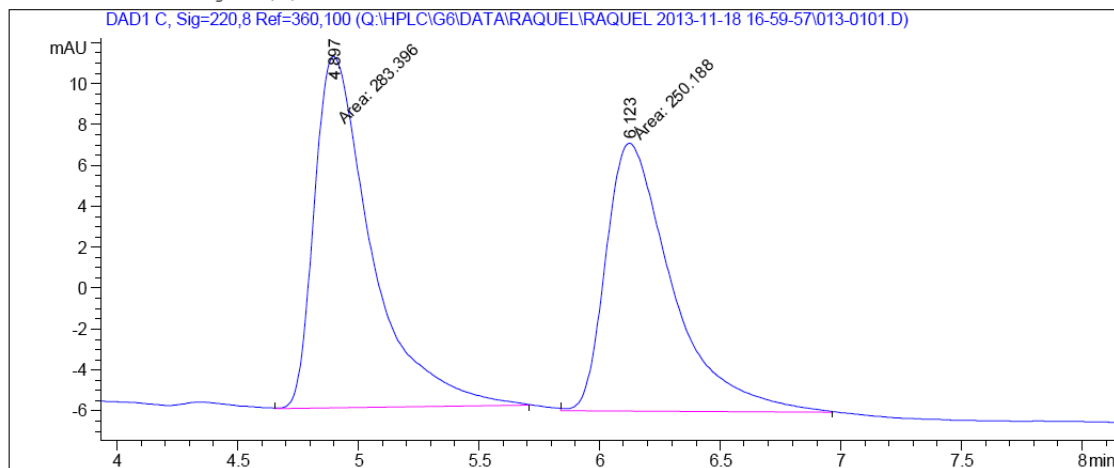

Signal 3: DAD1 C, Sig=220,8 Ref=360,100

| Peak # | RetTime [min] | Type | Width [min] | Area [mAU*s] | Height [mAU] | Area %  |
|--------|---------------|------|-------------|--------------|--------------|---------|
| 1      | 4.897         | MM   | 0.2748      | 283.39566    | 17.18750     | 53.1117 |
| 2      | 6.123         | MM   | 0.3188      | 250.18811    | 13.08142     | 46.8883 |

Totals : 533.58377 30.26892



## 6.6 $^1\text{H}$ and $^{13}\text{C}$ -NMR spectra and HPLC traces of compound 4z

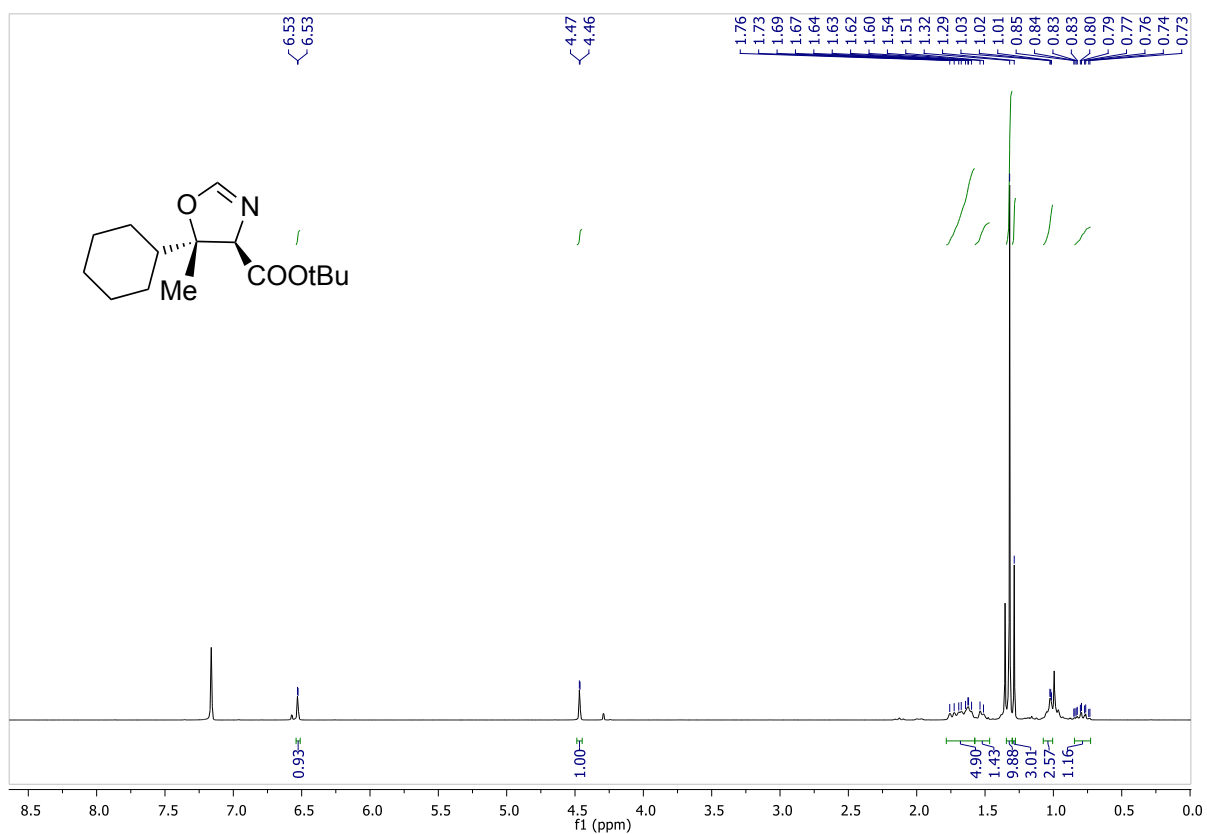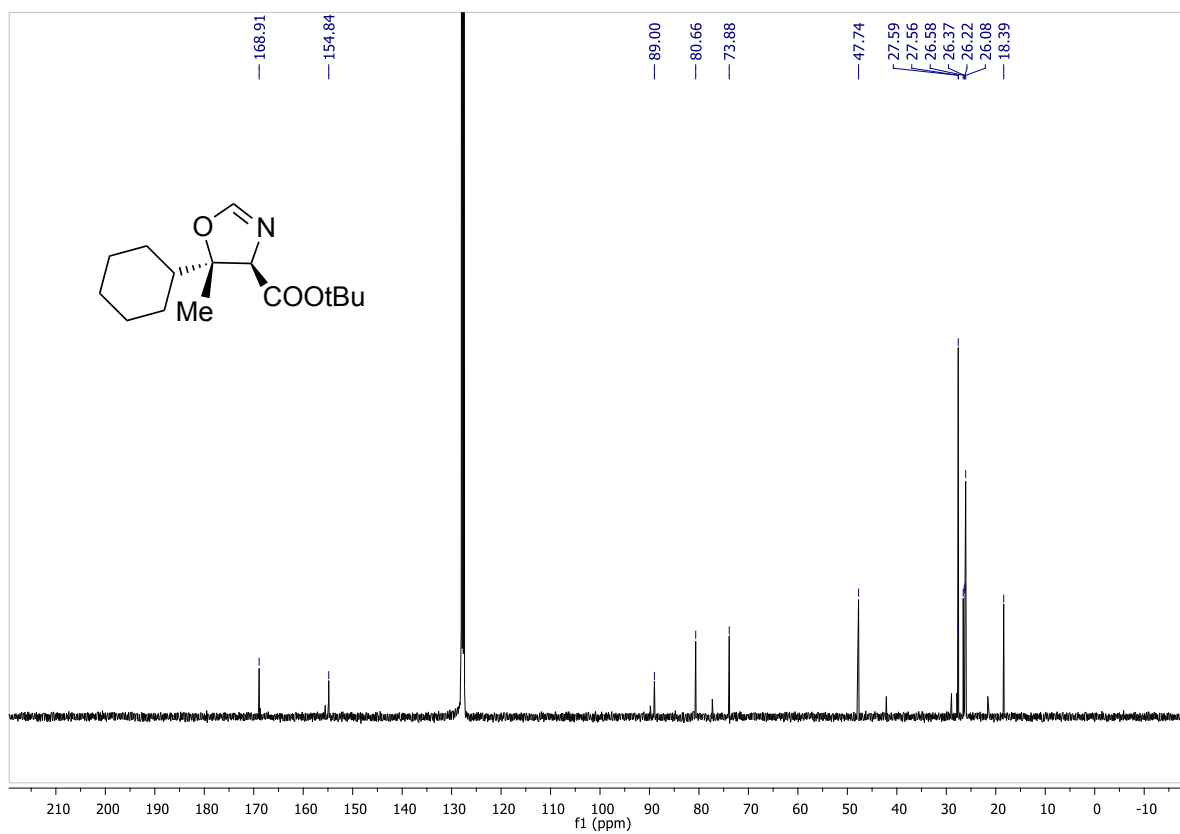

HPLC traces of **4z**

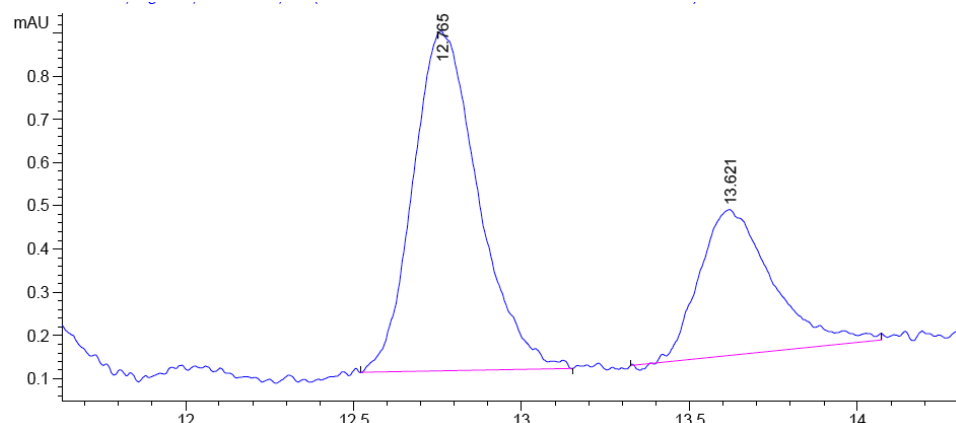

| Peak # | RetTime [min] | Type | Width [min] | Area [mAU*s] | Height [mAU] | Area %  |
|--------|---------------|------|-------------|--------------|--------------|---------|
| 1      | 12.765        | BB   | 0.2106      | 10.62484     | 7.81774e-1   | 67.4861 |
| 2      | 13.621        | BB   | 0.2290      | 5.11890      | 3.37373e-1   | 32.5139 |

HPLC traces of the enantiomer of **4z**

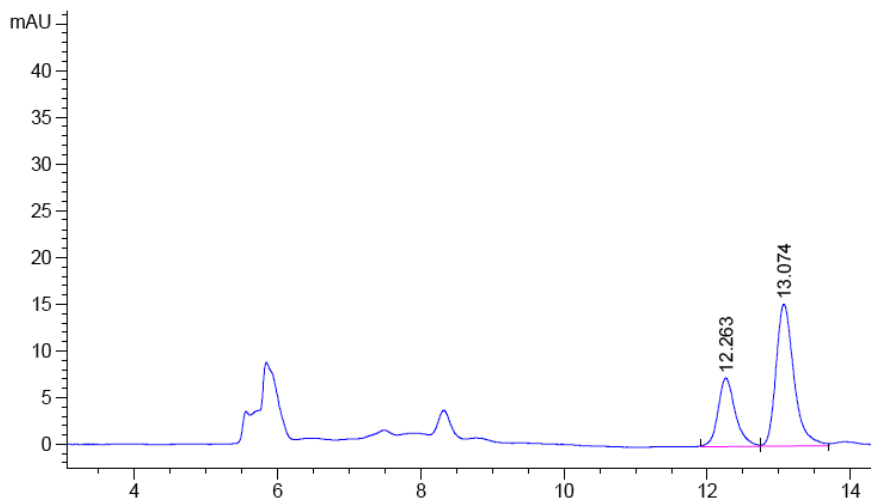

| Peak # | RetTime [min] | Type | Width [min] | Area [mAU*s] | Height [mAU] | Area %  |
|--------|---------------|------|-------------|--------------|--------------|---------|
| 1      | 12.263        | BV   | 0.2563      | 123.37828    | 7.33200      | 31.8211 |
| 2      | 13.074        | VV   | 0.2633      | 264.34637    | 15.17248     | 68.1789 |

HPLC traces of mixture of both enantiomers

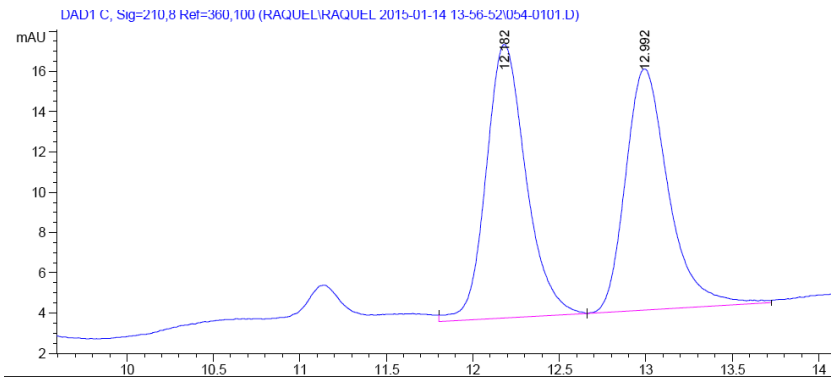

| Peak # | RetTime [min] | Type | Width [min] | Area [mAU*s] | Height [mAU] | Area %  |
|--------|---------------|------|-------------|--------------|--------------|---------|
| 1      | 12.182        | VV   | 0.2469      | 217.25031    | 13.56342     | 51.2339 |
| 2      | 12.992        | VB   | 0.2658      | 206.78554    | 11.95432     | 48.7661 |
